# Supplementary material for: Genome-wide transcriptome analysis of the plant pathogen Xanthomonas identifies sRNAs with putative virulence functions
Source: PubMed Central journal article supplement — Nucleic Acids Res. 2011 Nov 12;40(5):2020–31. doi: 10.1093/nar/gkr904 (PMC3300014; doi:10.1093/nar/gkr904), 2011-11-12
Supplement: supp_gkr904_nar-02265-h-2011-File008.pdf [file supp_gkr904_nar-02265-h-2011-File008.pdf]

**Table S1.** Bacterial strains, plasmids and oligonucleotides used in this study.

| Strain or plasmid                                           | Relevant characteristics <sup>a</sup>                                                                                                                                         | Reference or source |
|-------------------------------------------------------------|-------------------------------------------------------------------------------------------------------------------------------------------------------------------------------|---------------------|
| <b><i>Xanthomonas campestris</i> pv. <i>vesicatoria</i></b> |                                                                                                                                                                               |                     |
| 85-10                                                       | Pepper-race 2; wild type; Rif <sup>R</sup>                                                                                                                                    | (1)                 |
| 85-10Δ <i>hrpX</i>                                          | 85-10 derivative deleted in <i>hrpX</i> ; Rif <sup>R</sup>                                                                                                                    | (2)                 |
| 85-10Δ <i>sX12</i>                                          | 85-10 derivative deleted in <i>sX12</i> ; Rif <sup>R</sup>                                                                                                                    | This study          |
| 85*                                                         | 85-10 derivative containing the <i>hrpG</i> * mutation; Rif <sup>R</sup>                                                                                                      | (3)                 |
| <b><i>Escherichia coli</i></b>                              |                                                                                                                                                                               |                     |
| DH5α λpir                                                   | F <sup>-</sup> <i>recA hsdR17(r<sub>k</sub><sup>+</sup>, m<sub>k</sub><sup>+</sup>) φ80dlacZ ΔM15 [λpir]</i>                                                                  | (4)                 |
| TOP10                                                       | F <sup>-</sup> <i>mcrA Δ(mrr-hsdRMS-mcrBC) φ80lacZΔM15 ΔlacX74 recA1 araD139 Δ(ara-leu) 7697 galJ galK rpsL (Str<sup>R</sup>) endA1 nupG</i>                                  | Invitrogen          |
| TOP10F <sup>-</sup>                                         | F <sup>-</sup> { <i>lacI<sup>q</sup> Tn10 (Tet<sup>R</sup>-)</i> } <i>mcrA Δ(mrr-hsdRMS-mcrBC) φ80lacZΔM15ΔlacX74 recA1 araD139 Δ(ara-leu) 7697 galJ galK rpsL endA1 nupG</i> | Invitrogen          |
| <b>Plasmids</b>                                             |                                                                                                                                                                               |                     |
| pBRM-P                                                      | Derivative of pBBR1MCS-5 without promoter; Gm <sup>R</sup>                                                                                                                    | (5)                 |
| pBRM-sX6                                                    | pBRM-P derivative expressing c-Myc-epitope tagged sX6; Gm <sup>R</sup>                                                                                                        | This study          |
| pCR 2.1-TOPO                                                | General-purpose cloning vector; Ap <sup>R</sup> Km <sup>R</sup>                                                                                                               | Invitrogen          |
| pFG72-1                                                     | Derivative of pUFR043 containing <i>hrpG</i> *, Km <sup>R</sup>                                                                                                               | (3)                 |
| pLAFR6                                                      | RK2 replicon, Mob <sup>+</sup> Tra <sup>+</sup> ; without promoter; multicloning site flanked by transcription terminators; Tc <sup>R</sup>                                   | (6)                 |
| psX12                                                       | pLAFR6 derivative containing <i>sX12</i> ; Tc <sup>R</sup>                                                                                                                    | This study          |
| pOK1                                                        | Suicide vector; <i>sacB sacQ mobRK2 oriR6K</i> ; Sm <sup>R</sup>                                                                                                              | (7)                 |
| pOKΔ <i>sX12</i>                                            | pOK1 derivative containing flanking regions of <i>sX12</i> ; Sm <sup>R</sup>                                                                                                  | This study          |
| pRK2013                                                     | ColE1 replicon, TraRK <sup>+</sup> Mob <sup>+</sup> ; Km <sup>R</sup>                                                                                                         | (8)                 |
| <b>Oligonucleotide</b>                                      | <b>Sequence (Purpose)</b>                                                                                                                                                     | <b>Gene</b>         |
| NB76                                                        | CTGCGTGGAGTTTCTAGGCT (Northern blot probe)                                                                                                                                    | <i>sX1</i>          |
| NB2                                                         | GTCGCCTAGATGCTCTAGGG (Northern blot probe)                                                                                                                                    | <i>sX2</i>          |
| NB12                                                        | GTGGCGAGTAAGGCCAAAAAG (Northern blot probe)                                                                                                                                   | <i>sX3</i>          |
| NB13                                                        | CAAATTGTTTCAGGAACCTACGC (Northern blot probe)                                                                                                                                 | <i>sX4</i>          |
| NB81                                                        | GGACTTCGTAACGCAGGACT (Northern blot probe)                                                                                                                                    | <i>sX5</i>          |
| NB16                                                        | TCAGGATGTGCTTGAACCTTCAT (Northern blot probe)                                                                                                                                 | <i>sX6</i>          |
| NB17                                                        | CTCCTGGCCTTCGATAGATCTA (Northern blot probe)                                                                                                                                  | <i>sX7</i>          |
| NB23                                                        | ACTAGGCGCATAAGTCGTTGTT (Northern blot probe)                                                                                                                                  | <i>sX8</i>          |
| NB25                                                        | ACATCACACCGCGACCAG (Northern blot probe)                                                                                                                                      | <i>sX9</i>          |
| NB28                                                        | CCGAAGGAGTGTGTATTAGC (Northern blot probe)                                                                                                                                    | <i>sX10</i>         |
| NB31                                                        | AGTAGTAGGCTTGCTCAGAGCC (Northern blot probe)                                                                                                                                  | <i>sX11</i>         |
| NB42                                                        | TACCTTTCGACGAGGATGTG (Northern blot probe)                                                                                                                                    | <i>sX12</i>         |
| NB100                                                       | GAGAGATCTACCGACAGGCGT (Northern blot probe)                                                                                                                                   | <i>sX13</i>         |
| NB101                                                       | CACAGCTCCGACTGACATC (Northern blot probe)                                                                                                                                     | <i>sX14</i>         |
| NB67                                                        | TTACCGATCGTCGTGTAGCTG (Northern blot probe)                                                                                                                                   | <i>sX15</i>         |
| NB30                                                        | TGGTCGTAATTAAGGGACAAG (Northern blot probe)                                                                                                                                   | 6S                  |
| NB55                                                        | CTACCGACCCCTTACGCTACC (Northern blot probe)                                                                                                                                   | <i>asX1</i>         |
| NB89                                                        | CAGACCACCCAACAACCTTC (Northern blot probe)                                                                                                                                    | <i>asX2</i>         |
| NB45                                                        | GCCGAACCTACGTCCTTGTC (Northern blot probe)                                                                                                                                    | <i>asX3</i>         |
| NB98                                                        | CCAAAAACACGACTCAGTCG (Northern blot probe)                                                                                                                                    | <i>asX4</i>         |
| NB37                                                        | GATCAAACGAGTGGCTACTGTG (Northern blot probe)                                                                                                                                  | <i>asX5</i>         |
| NB66                                                        | AAACAGACCATGTGGCACATC (Northern blot probe)                                                                                                                                   | <i>asX6</i>         |
| NB72                                                        | CAGCTACACGACGATCGGTA (Northern blot probe)                                                                                                                                    | <i>asX7</i>         |
| NB-5S                                                       | CCTGGCGATGACCTACTCTC (Northern blot probe)                                                                                                                                    | 5S rRNA             |
| 5' RNA-adapter                                              | AUAUGCGCGAAUUCUGUAGAACGAACACUAGAAGAAA (5' RACE; RNA-adapter)                                                                                                                  |                     |
| 3' RNA-adapter*                                             | P-UUCACUGUUCUAGCGCCGCAUGCUC-idT* (3' RACE; RNA-adapter)                                                                                                                       |                     |
| 5'-RACE-adapter                                             | GCGCGAATTCCTGTAGA (5' RACE; adapter-specific primer)                                                                                                                          |                     |
| 3'-RACE-adapter                                             | CGGCCGTAAGAACAG (3' RACE; adapter-specific primer)                                                                                                                            |                     |
| sX12-5' RACE1                                               | ACCTTTCGACGAGGATG (5' RACE; reverse transcription)                                                                                                                            | <i>sX12</i>         |
| sX12-5' RACE2                                               | CGACGAGGATGTGCAG (5' RACE; PCR)                                                                                                                                               | <i>sX12</i>         |
| sX12-3' RACE                                                | TGCACATCCTCGTCTGA (3' RACE; PCR)                                                                                                                                              | <i>sX12</i>         |

| Oligonucleotide         | Sequence (Purpose)                                                        | Gene |
|-------------------------|---------------------------------------------------------------------------|------|
| asX4-5'RACE1            | GAATCTGGTCACGACG (5' RACE; reverse transcription)                         | asX4 |
| asX4-5'RACE2            | TCTGGTCACGACGGTG (5' RACE; PCR)                                           | asX4 |
| asX4-3'RACE             | GTCGTGACCAGATTCCTGTCT (3' RACE; PCR)                                      | asX4 |
| pCR2.1_colo_fw          | ACGACGTTGTAACGACGG (colony PCR)                                           |      |
| pCR2.1_colo_rev         | TTCACACAGGAAACAGCTATGAC (colony PCR)                                      |      |
| pCR2.1_seq              | CACAGGAAACAGCTATGAC (sequencing)                                          |      |
| $\Delta$ sX12-left-fwd  | <u>CAGGATCC</u> ATGATCAGGGTGTGAGGGTG (sX12 deletion; left fragment)       | sX12 |
| $\Delta$ sX12-left-rev  | AAC <u>AAGCTT</u> ATGACCTCTGCCGGTTGTCT (sX12 deletion; left fragment)     | sX12 |
| $\Delta$ sX12-right-fwd | AAC <u>AAGCTT</u> AATCGATTTCCCGGCTTG (sX12 deletion; right fragment)      | sX12 |
| $\Delta$ sX12-right-rev | <u>GCTCTAGAGTGGCGACCTGGTACTTCAG</u> (sX12 deletion; right fragment)       | sX12 |
| sX12-comp-fwd           | <u>CAGGATCCAACGGAGTTCAGCACTACGGT</u> (complementation of $\Delta$ sX12)   | sX12 |
| sX12-comp-rev           | AAC <u>AAGCTT</u> CGAATTCTTGGAAATGGTCA (complementation of $\Delta$ sX12) | sX12 |
| sX6-fwd                 | TTT <u>GGTCTCT</u> ATTTCGCTGAGCCGATTTTTGCAC (sX6-c-Myc tagging)           | sX6  |
| sX6-rev                 | TTT <u>GGTCTCT</u> CACCGCTGCAGGCTTTTCTTCTCC (sX6-c-Myc tagging)           | sX6  |

<sup>a</sup>, Ap, ampicillin; Gm, gentamycin; Km, kanamycin; Rif, rifampicin; Sm, spectinomycin; Tc, tetracycline. <sup>R</sup>, resistance. Recognition sites of restriction enzymes are underlined.

\*, RNA oligonucleotide carrying a phosphate modification at the 5' and an inverted deoxythymidine (idT) at the 3' end.

## References

- Canteros, B.I. (1990) Ph.D. thesis. *University of Florida, Gainesville, FL.*
- Koebnik, R., Krüger, A., Thieme, F., Urban, A. and Bonas, U. (2006) Specific binding of the *Xanthomonas campestris* pv. *vesicatoria* AraC-type transcriptional activator HrpX to plant-inducible promoter boxes. *J. Bacteriol.*, **188**, 7652-7660.
- Wengelnik, K., Rossier, O. and Bonas, U. (1999) Mutations in the regulatory gene *hrpG* of *Xanthomonas campestris* pv. *vesicatoria* result in constitutive expression of all *hrp* genes. *J. Bacteriol.*, **181**, 6828-6831.
- Menard, R., Sansonetti, P.J. and Parsot, C. (1993) Nonpolar mutagenesis of the *ipa* genes defines IpaB, IpaC, and IpaD as effectors of *Shigella flexneri* entry into epithelial cells. *J. Bacteriol.*, **175**, 5899-5906.
- Szczesny, R., Jordan, M., Schramm, C., Schulz, S., Coge, V., Bonas, U. and Büttner, D. (2010) Functional characterization of the Xcs and Xps type II secretion systems from the plant pathogenic bacterium *Xanthomonas campestris* pv. *vesicatoria*. *New Phytol.*, **187**, 983-1002.
- Bonas, U., Stall, R.E. and Staskawicz, B. (1989) Genetic and structural characterization of the avirulence gene *avrBs3* from *Xanthomonas campestris* pv. *vesicatoria*. *Mol. Gen. Genet.*, **218**, 127-136.
- Huguët, E., Hahn, K., Wengelnik, K. and Bonas, U. (1998) *hpaA* mutants of *Xanthomonas campestris* pv. *vesicatoria* are affected in pathogenicity but retain the ability to induce host-specific hypersensitive reaction. *Mol. Microbiol.*, **29**, 1379-1390.
- Figurski, D.H. and Helinski, D.R. (1979) Replication of an origin-containing derivative of plasmid RK2 dependent on a plasmid function provided *in trans*. *Proc. Natl. Acad. Sci. U. S. A.*, **76**, 1648-1652.

**Table S2.** Classification of putative TSSs which were automatically identified in the *Xcv* genome [see Figure 1B and METHODS; (1)].

| TSS position <sup>a</sup> | Strand | p-value <sup>b</sup> | Library 2 <sup>c</sup> | Library 1 <sup>c</sup> | Primary <sup>d</sup> to CDS | 5' UTR (bp) | Internal <sup>d</sup> to CDS | Distance to start/stop <sup>e</sup> (bp) | Antisense <sup>d</sup> to CDS | Distance to start/stop <sup>e</sup> (bp) | Orphan <sup>f</sup> |
|---------------------------|--------|----------------------|------------------------|------------------------|-----------------------------|-------------|------------------------------|------------------------------------------|-------------------------------|------------------------------------------|---------------------|
| 22092#                    | +      | 0.0001               | 6                      | 0                      | XCVd0018                    | 29          | -                            | -                                        | -                             | -                                        | -                   |
| 22614#                    | -      | 0.0034               | 7                      | 2                      | -                           | -           | -                            | -                                        | XCVd0019                      | 28/478                                   | -                   |
| 24098#                    | -      | 0.0191               | 3                      | 0                      | -                           | -           | -                            | -                                        | -                             | -                                        | +                   |
| 31729#                    | -      | 0.0071               | 7                      | 0                      | -                           | -           | -                            | -                                        | -                             | -                                        | +                   |
| 54664#                    | -      | 0.0344               | 3                      | 0                      | -                           | -           | -                            | -                                        | XCVd0049                      | 81/1463                                  | -                   |
| 56391#                    | -      | 0.0000               | 72                     | 14                     | -                           | -           | -                            | -                                        | -                             | -                                        | +                   |
| 63600#                    | +      | 0.0003               | 6                      | 0                      | -                           | -           | -                            | -                                        | XCVd0054                      | 572/930                                  | -                   |
| 76432#                    | -      | 0.0007               | 7                      | 0                      | XCVd0069                    | 24          | -                            | -                                        | -                             | -                                        | -                   |
| 81111#                    | -      | 0.0032               | 9                      | 2                      | -                           | -           | -                            | -                                        | XCVd0073                      | 701/681                                  | -                   |
| 81749#                    | -      | 0.0014               | 9                      | 2                      | -                           | -           | -                            | -                                        | XCVd0073                      | 1339/43                                  | -                   |
| 82121#                    | +      | 0.0018               | 5                      | 1                      | XCVd0074                    | 21          | -                            | -                                        | -                             | -                                        | -                   |
| 88062#                    | +      | 0.0024               | 4                      | 0                      | -                           | -           | XCVd0079                     | 757/2551                                 | -                             | -                                        | -                   |
| 90670#                    | +      | 0.0341               | 9                      | 0                      | XCVd0080                    | 50          | -                            | -                                        | -                             | -                                        | -                   |
| 94989#                    | +      | 0.0081               | 4                      | 0                      | -                           | -           | XCVd0086                     | 82/1066                                  | -                             | -                                        | -                   |
| 95432#                    | -      | 0.0000               | 21                     | 1                      | -                           | -           | -                            | -                                        | XCVd0086                      | 525/623                                  | -                   |
| 97457#                    | -      | 0.0064               | 6                      | 1                      | -                           | -           | -                            | -                                        | XCVd0087                      | 1099/1000                                | -                   |
| 99301#                    | -      | 0.0172               | 4                      | 0                      | -                           | -           | XCVd0089                     | 238/370                                  | -                             | -                                        | -                   |
| 100770#                   | +      | 0.0000               | 20                     | 2                      | -                           | -           | XCVd0091                     | 817/13                                   | -                             | -                                        | -                   |
| 101600#                   | +      | 0.0145               | 5                      | 0                      | XCVd0093                    | 287         | -                            | -                                        | XCVd0092                      | 52/706                                   | -                   |
| 101864#                   | +      | 0.0000               | 156                    | 25                     | XCVd0093                    | 23          | -                            | -                                        | -                             | -                                        | -                   |
| 103085#                   | +      | 0.0369               | 4                      | 3                      | -                           | -           | -                            | -                                        | XCVd0094                      | 894/170                                  | -                   |
| 104001#                   | -      | 0.0000               | 57                     | 11                     | XCVd0094                    | 22          | -                            | -                                        | -                             | -                                        | -                   |
| 109851#                   | +      | 0.0000               | 35                     | 6                      | -                           | -           | -                            | -                                        | XCVd0099                      | 1283/99                                  | -                   |
| 112115#                   | -      | 0.0104               | 5                      | 0                      | XCVd0101<br>XCVd0102        | 285<br>28   | -                            | -                                        | -                             | -                                        | -                   |
| 112250#                   | +      | 0.0000               | 41                     | 11                     | XCVd0103                    | 27          | -                            | -                                        | -                             | -                                        | -                   |
| 113697#                   | +      | 0.0159               | 3                      | 1                      | -                           | -           | -                            | -                                        | XCVd0104                      | 755/579                                  | -                   |
| 114827#                   | -      | 0.0000               | 11                     | 0                      | -                           | -           | XCVd0105                     | 786/281                                  | -                             | -                                        | -                   |
| 115639#                   | -      | 0.0000               | 33                     | 4                      | XCVd0105                    | 26          | -                            | -                                        | -                             | -                                        | -                   |
| 116378#                   | +      | 0.0000               | 80                     | 8                      | XCVd0107                    | 277         | -                            | -                                        | XCVd0106                      | 31/486                                   | -                   |
| 117900#                   | +      | 0.0000               | 18                     | 2                      | -                           | -           | -                            | -                                        | XCVd0109                      | 740/180                                  | -                   |
| 117969#                   | +      | 0.0018               | 13                     | 2                      | -                           | -           | -                            | -                                        | XCVd0109                      | 671/249                                  | -                   |
| 118654#                   | +      | 0.0156               | 8                      | 1                      | XCVd0110                    | 201         | -                            | -                                        | XCVd0109                      | 14/934                                   | -                   |
| 118665#                   | -      | 0.0000               | 54                     | 9                      | XCVd0109                    | 25          | -                            | -                                        | -                             | -                                        | -                   |
| 119469#                   | +      | 0.0018               | 5                      | 1                      | XCVd0112                    | 49          | XCVd0111                     | 375/41                                   | -                             | -                                        | -                   |
| 120806#                   | +      | 0.0083               | 6                      | 1                      | -                           | -           | XCVd0112                     | 1288/1684                                | -                             | -                                        | -                   |
| 120867#                   | -      | 0.0229               | 5                      | 1                      | -                           | -           | -                            | -                                        | XCVd0112                      | 1349/1623                                | -                   |
| 123136#                   | +      | 0.0004               | 5                      | 0                      | XCVd0114                    | 218         | XCVd0113                     | 624/71                                   | -                             | -                                        | -                   |
| 127227#                   | -      | 0.0439               | 4                      | 2                      | -                           | -           | -                            | -                                        | XCVd0115                      | 3019/62                                  | -                   |
| 127749#                   | -      | 0.0000               | 28                     | 3                      | -                           | -           | -                            | -                                        | XCVd0116                      | 275/1032                                 | -                   |
| 136150#                   | +      | 0.0027               | 3                      | 0                      | -                           | -           | XCVd0125                     | 512/210                                  | -                             | -                                        | -                   |
| 137519#                   | -      | 0.0000               | 15                     | 0                      | XCVd0126                    | 23          | -                            | -                                        | -                             | -                                        | -                   |
| 138153#                   | +      | 0.0020               | 5                      | 0                      | -                           | -           | -                            | -                                        | XCVd0127                      | 74/355                                   | -                   |
| 151691#                   | +      | 0.0026               | 4                      | 0                      | -                           | -           | -                            | -                                        | XCVd0144                      | 337/304                                  | -                   |
| 159251#                   | +      | 0.0000               | 49                     | 5                      | XCVd0153                    | 36          | -                            | -                                        | XCVd0152                      | 71/2254                                  | -                   |
| 159633#                   | +      | 0.0158               | 3                      | 0                      | -                           | -           | XCVd0153                     | 346/49                                   | XCVd0154                      | 409/74                                   | -                   |
| 164247#                   | -      | 0.0168               | 3                      | 0                      | -                           | -           | XCVd0155                     | 1062/4193                                | -                             | -                                        | -                   |
| 169348#                   | +      | 0.0024               | 3                      | 0                      | -                           | -           | -                            | -                                        | XCVd0160<br>XCVd0161          | 98/667<br>249/104                        | -                   |
| 180140#                   | +      | 0.0049               | 3                      | 0                      | -                           | -           | -                            | -                                        | XCVd0171                      | 604/86                                   | -                   |
| 182433#                   | -      | 0.0050               | 3                      | 0                      | XCVd0172                    | 62          | -                            | -                                        | -                             | -                                        | -                   |

<sup>a</sup>, TSS position on the *Xcv* chromosome and the plasmid (pXCV183; marked with #), respectively. <sup>b</sup>, p-value indicates the significance of the annotated TSS (see METHODS). <sup>c</sup>, number of read starts at TSS position. <sup>d</sup>, TSS classification and the corresponding CDS. <sup>e</sup>, distance of the TSS to annotated start and stop codon of the corresponding CDS. <sup>f</sup>, a TSS is classified as orphan (+) if it is neither classified as primary, internal nor antisense TSS.

| TSS position <sup>a</sup> | Strand | p-value <sup>b</sup> | Library 2 <sup>c</sup> | Library 1 <sup>c</sup> | Primary <sup>d</sup> to CDS | 5' UTR (bp) | Internal <sup>d</sup> to CDS | Distance to start/stop <sup>e</sup> (bp) | Antisense <sup>d</sup> to CDS | Distance to start/stop <sup>e</sup> (bp) | Orphan <sup>f</sup> |
|---------------------------|--------|----------------------|------------------------|------------------------|-----------------------------|-------------|------------------------------|------------------------------------------|-------------------------------|------------------------------------------|---------------------|
| 1404                      | +      | 0.0000               | 15                     | 1                      | XCV0002                     | 202         | -                            | -                                        | -                             | -                                        | -                   |
| 9520                      | +      | 0.0078               | 5                      | 2                      | XCV0007                     | 68          | -                            | -                                        | -                             | -                                        | -                   |
| 10034                     | +      | 0.0036               | 4                      | 0                      | -                           | -           | XCV0007                      | 446/744                                  | -                             | -                                        | -                   |
| 10857                     | +      | 0.0001               | 10                     | 1                      | XCV0008                     | 78          | -                            | -                                        | -                             | -                                        | -                   |
| 11675                     | -      | 0.0001               | 6                      | 0                      | -                           | -           | -                            | -                                        | XCV0009<br>XCV0008            | 17/775<br>740/72                         | -                   |
| 15312                     | -      | 0.0000               | 12                     | 0                      | XCV0013<br>XCV0014          | 297<br>20   | -                            | -                                        | -                             | -                                        | -                   |
| 17027                     | +      | 0.0000               | 42                     | 18                     | -                           | -           | XCV0016                      | 23/900                                   | -                             | -                                        | -                   |
| 17192                     | -      | 0.0001               | 12                     | 0                      | -                           | -           | -                            | -                                        | XCV0016                       | 188/735                                  | -                   |
| 18468                     | +      | 0.0022               | 3                      | 0                      | -                           | -           | XCV0017                      | 538/49                                   | -                             | -                                        | -                   |
| 18664                     | -      | 0.0147               | 3                      | 0                      | -                           | -           | -                            | -                                        | -                             | -                                        | +                   |
| 23398                     | +      | 0.0000               | 13                     | 1                      | -                           | -           | XCV0022                      | 45/317                                   | -                             | -                                        | -                   |
| 38760                     | -      | 0.0000               | 13                     | 0                      | -                           | -           | XCV0035                      | 12/425                                   | -                             | -                                        | -                   |
| 44970                     | -      | 0.0000               | 14                     | 3                      | XCV0037                     | 79          | -                            | -                                        | -                             | -                                        | -                   |
| 45473                     | +      | 0.0246               | 5                      | 0                      | XCV0039                     | 58          | -                            | -                                        | XCV0038                       | 1/376                                    | -                   |
| 45497                     | -      | 0.0170               | 3                      | 0                      | XCV0038                     | 23          | -                            | -                                        | XCV0039                       | 34/1308                                  | -                   |
| 46397                     | -      | 0.0101               | 3                      | 0                      | -                           | -           | -                            | -                                        | XCV0039                       | 866/408                                  | -                   |
| 47391                     | -      | 0.0063               | 6                      | 0                      | XCV0040                     | 22          | -                            | -                                        | -                             | -                                        | -                   |
| 52187                     | +      | 0.0170               | 3                      | 1                      | XCV0045                     | 22          | -                            | -                                        | -                             | -                                        | -                   |
| 60944                     | -      | 0.0066               | 4                      | 0                      | XCV0050                     | 66          | -                            | -                                        | XCV0051                       | 98/1191                                  | -                   |
| 62304                     | +      | 0.0206               | 3                      | 0                      | XCV0052                     | 23          | -                            | -                                        | -                             | -                                        | -                   |
| 72269                     | +      | 0.0213               | 3                      | 0                      | XCV0061                     | 116         | -                            | -                                        | XCV0060                       | 27/761                                   | -                   |
| 72322                     | -      | 0.0002               | 9                      | 1                      | XCV0060                     | 80          | -                            | -                                        | XCV0061                       | 63/404                                   | -                   |
| 72626                     | +      | 0.0001               | 13                     | 2                      | -                           | -           | XCV0061                      | 241/100                                  | -                             | -                                        | -                   |
| 75816                     | -      | 0.0016               | 4                      | 0                      | -                           | -           | -                            | -                                        | -                             | -                                        | +                   |
| 77193                     | -      | 0.0006               | 6                      | 1                      | XCV0064                     | 16          | -                            | -                                        | -                             | -                                        | -                   |
| 78522                     | +      | 0.0000               | 23                     | 2                      | -                           | -           | XCV0066                      | 817/13                                   | XCV0067                       | 231/46                                   | -                   |
| 78978                     | -      | 0.0187               | 8                      | 5                      | XCV0067                     | 225         | -                            | -                                        | -                             | -                                        | -                   |
| 81973                     | -      | 0.0123               | 6                      | 2                      | XCV0069                     | 270         | -                            | -                                        | -                             | -                                        | -                   |
| 84253                     | -      | 0.0047               | 3                      | 0                      | XCV0072                     | 20          | -                            | -                                        | -                             | -                                        | -                   |
| 84514                     | +      | 0.0058               | 3                      | 0                      | -                           | -           | XCV0073                      | 121/460                                  | -                             | -                                        | -                   |
| 85087                     | +      | 0.0000               | 11                     | 0                      | -                           | -           | -                            | -                                        | -                             | -                                        | +                   |
| 87652                     | +      | 0.0469               | 7                      | 0                      | XCV0077                     | 22          | -                            | -                                        | -                             | -                                        | -                   |
| 89289                     | +      | 0.0065               | 4                      | 0                      | -                           | -           | XCV0078                      | 1122/2840                                | -                             | -                                        | -                   |
| 103766                    | +      | 0.0206               | 3                      | 0                      | -                           | -           | -                            | -                                        | XCV0088                       | 747/149                                  | -                   |
| 109502                    | -      | 0.0009               | 6                      | 1                      | XCV0092                     | 72          | -                            | -                                        | -                             | -                                        | -                   |
| 117077                    | -      | 0.0026               | 4                      | 0                      | XCV0099                     | 274         | XCV0100                      | 573/266                                  | -                             | -                                        | -                   |
| 118296                    | -      | 0.0401               | 3                      | 1                      | -                           | -           | XCV0101                      | 675/524                                  | -                             | -                                        | -                   |
| 133989                    | +      | 0.0164               | 3                      | 1                      | -                           | -           | XCV0117                      | 8/588                                    | -                             | -                                        | -                   |
| 138711                    | +      | 0.0011               | 6                      | 1                      | XCV0120                     | 26          | -                            | -                                        | -                             | -                                        | -                   |
| 139008                    | +      | 0.0333               | 3                      | 0                      | -                           | -           | XCV0120                      | 271/934                                  | -                             | -                                        | -                   |
| 149036                    | +      | 0.0002               | 7                      | 0                      | -                           | -           | -                            | -                                        | -                             | -                                        | +                   |
| 149533                    | -      | 0.0000               | 13                     | 1                      | -                           | -           | XCV0125                      | 817/13                                   | -                             | -                                        | -                   |
| 152067                    | -      | 0.0152               | 5                      | 0                      | -                           | -           | -                            | -                                        | XCV0128                       | 155/543                                  | -                   |
| 155750                    | +      | 0.0005               | 11                     | 2                      | XCV0131                     | 227         | -                            | -                                        | -                             | -                                        | -                   |
| 156627                    | -      | 0.0000               | 15                     | 3                      | -                           | -           | -                            | -                                        | XCV0132                       | 106/295                                  | -                   |
| 192866                    | -      | 0.0118               | 3                      | 0                      | XCV0160                     | 31          | -                            | -                                        | -                             | -                                        | -                   |
| 193010                    | +      | 0.0008               | 9                      | 2                      | XCV0161                     | 0           | -                            | -                                        | -                             | -                                        | -                   |
| 193630                    | +      | 0.0149               | 3                      | 1                      | -                           | -           | XCV0161                      | 620/750                                  | -                             | -                                        | -                   |
| 195442                    | -      | 0.0000               | 22                     | 0                      | XCV0162                     | 23          | -                            | -                                        | -                             | -                                        | -                   |
| 196578                    | +      | 0.0000               | 37                     | 10                     | XCV0164                     | 32          | -                            | -                                        | -                             | -                                        | -                   |
| 201827                    | -      | 0.0015               | 7                      | 2                      | XCV0168                     | 0           | -                            | -                                        | XCV0169                       | 12/1352                                  | -                   |
| 201899                    | +      | 0.0000               | 16                     | 1                      | -                           | -           | XCV0169                      | 84/1280                                  | XCV0168                       | 72/1250                                  | -                   |

<sup>a</sup>, TSS position on the *Xcv* chromosome and the plasmid (pXCV183; marked with #), respectively. <sup>b</sup>, p-value indicates the significance of the annotated TSS (see METHODS). <sup>c</sup>, number of read starts at TSS position. <sup>d</sup>, TSS classification and the corresponding CDS. <sup>e</sup>, distance of the TSS to annotated start and stop codon of the corresponding CDS. <sup>f</sup>, a TSS is classified as orphan (+) if it is neither classified as primary, internal nor antisense TSS.

| TSS position <sup>a</sup> | Strand | p-value <sup>b</sup> | Library 2 <sup>c</sup> | Library 1 <sup>c</sup> | Primary <sup>d</sup> to CDS | 5' UTR (bp) | Internal <sup>d</sup> to CDS | Distance to start/stop <sup>e</sup> (bp) | Antisense <sup>d</sup> to CDS | Distance to start/stop <sup>e</sup> (bp) | Orphan <sup>f</sup> |
|---------------------------|--------|----------------------|------------------------|------------------------|-----------------------------|-------------|------------------------------|------------------------------------------|-------------------------------|------------------------------------------|---------------------|
| 204493                    | +      | 0.0000               | 12                     | 2                      | -                           | -           | -                            | -                                        | XCV0172                       | 3775/71                                  | -                   |
| 208848                    | +      | 0.0338               | 4                      | 0                      | -                           | -           | XCV0173                      | 420/248                                  | -                             | -                                        | -                   |
| 212756                    | +      | 0.0000               | 8                      | 0                      | XCV0178                     | 116         | XCV0177                      | 396/116                                  | -                             | -                                        | -                   |
| 217013                    | +      | 0.0021               | 4                      | 0                      | -                           | -           | XCV0181                      | 424/562                                  | -                             | -                                        | -                   |
| 217960                    | +      | 0.0416               | 7                      | 4                      | XCV0183                     | 22          | -                            | -                                        | -                             | -                                        | -                   |
| 220222                    | +      | 0.0000               | 11                     | 0                      | XCV0184                     | 23          | -                            | -                                        | -                             | -                                        | -                   |
| 222838                    | -      | 0.0000               | 17                     | 0                      | XCV0186                     | 21          | -                            | -                                        | -                             | -                                        | -                   |
| 224042                    | +      | 0.0000               | 15                     | 2                      | XCV0188                     | 35          | -                            | -                                        | -                             | -                                        | -                   |
| 225642                    | +      | 0.0161               | 4                      | 2                      | XCV0189                     | 118         | -                            | -                                        | -                             | -                                        | -                   |
| 237714                    | -      | 0.0365               | 4                      | 1                      | XCV0200                     | 47          | -                            | -                                        | -                             | -                                        | -                   |
| 238550                    | -      | 0.0323               | 7                      | 0                      | XCV0201                     | 0           | -                            | -                                        | XCV0202                       | 57/1010                                  | -                   |
| 240862                    | +      | 0.0050               | 6                      | 2                      | XCV0205                     | 23          | -                            | -                                        | -                             | -                                        | -                   |
| 241374                    | +      | 0.0011               | 4                      | 0                      | XCV0206                     | 55          | -                            | -                                        | -                             | -                                        | -                   |
| 244105                    | -      | 0.0000               | 194                    | 14                     | XCV0208                     | 62          | -                            | -                                        | -                             | -                                        | -                   |
| 244587                    | +      | 0.0000               | 15                     | 2                      | -                           | -           | XCV0209                      | 4/1204                                   | -                             | -                                        | -                   |
| 250048                    | +      | 0.0221               | 3                      | 0                      | -                           | -           | -                            | -                                        | XCV0213                       | 484/535                                  | -                   |
| 252996                    | +      | 0.0000               | 19                     | 1                      | -                           | -           | -                            | -                                        | XCV0214                       | 72/2471                                  | -                   |
| 253127                    | -      | 0.0000               | 25                     | 10                     | XCV0214                     | 203         | -                            | -                                        | -                             | -                                        | -                   |
| 261157                    | +      | 0.0000               | 17                     | 2                      | XCV0221                     | 81          | -                            | -                                        | -                             | -                                        | -                   |
| 261741                    | -      | 0.0000               | 15                     | 1                      | -                           | -           | XCV0222                      | 817/13                                   | XCV0221                       | 503/3                                    | -                   |
| 265771                    | -      | 0.0000               | 43                     | 8                      | -                           | -           | XCV0226                      | 216/569                                  | -                             | -                                        | -                   |
| 266587                    | -      | 0.0000               | 66                     | 8                      | XCV0227                     | 90          | -                            | -                                        | -                             | -                                        | -                   |
| 267156                    | +      | 0.0000               | 17                     | 2                      | -                           | -           | -                            | -                                        | -                             | -                                        | +                   |
| 269292                    | +      | 0.0043               | 3                      | 0                      | -                           | -           | -                            | -                                        | -                             | -                                        | +                   |
| 278015                    | -      | 0.0012               | 6                      | 0                      | XCV0236                     | 0           | -                            | -                                        | -                             | -                                        | -                   |
| 278867                    | +      | 0.0100               | 5                      | 0                      | XCV0238                     | 23          | -                            | -                                        | -                             | -                                        | -                   |
| 280390                    | +      | 0.0019               | 3                      | 0                      | XCV0240                     | 22          | -                            | -                                        | -                             | -                                        | -                   |
| 283462                    | +      | 0.0037               | 4                      | 0                      | XCV0243                     | 0           | -                            | -                                        | -                             | -                                        | -                   |
| 285329                    | +      | 0.0140               | 4                      | 1                      | XCV0244                     | 22          | -                            | -                                        | -                             | -                                        | -                   |
| 287897                    | -      | 0.0105               | 4                      | 1                      | XCV0246                     | 21          | -                            | -                                        | -                             | -                                        | -                   |
| 288111                    | +      | 0.0128               | 10                     | 5                      | XCV0247                     | 0           | -                            | -                                        | -                             | -                                        | -                   |
| 292756                    | +      | 0.0016               | 8                      | 0                      | XCV0252                     | 122         | -                            | -                                        | XCV0251                       | 108/629                                  | -                   |
| 295006                    | +      | 0.0046               | 6                      | 1                      | XCV0255                     | 119         | -                            | -                                        | -                             | -                                        | -                   |
| 304274                    | +      | 0.0276               | 5                      | 0                      | XCV0264                     | 150         | -                            | -                                        | XCV0263                       | 49/904                                   | -                   |
| 307776                    | +      | 0.0002               | 11                     | 2                      | XCV0266                     | 37          | -                            | -                                        | -                             | -                                        | -                   |
| 311632                    | -      | 0.0178               | 3                      | 0                      | -                           | -           | XCV0268                      | 98/213                                   | -                             | -                                        | -                   |
| 315387                    | -      | 0.0003               | 5                      | 0                      | XCV0270                     | 36          | -                            | -                                        | -                             | -                                        | -                   |
| 320398                    | +      | 0.0021               | 6                      | 1                      | XCV0274                     | 234         | -                            | -                                        | XCV0273                       | 105/1055                                 | -                   |
| 321787                    | -      | 0.0437               | 7                      | 0                      | -                           | -           | -                            | -                                        | XCV0275<br>XCV0276            | 448/77<br>77/444                         | -                   |
| 325673                    | +      | 0.0000               | 24                     | 2                      | XCV0281                     | 36          | -                            | -                                        | -                             | -                                        | -                   |
| 329286                    | -      | 0.0271               | 4                      | 0                      | XCV0283                     | 97          | -                            | -                                        | XCV0284                       | 35/1287                                  | -                   |
| 331021                    | -      | 0.0263               | 6                      | 1                      | -                           | -           | XCV0285                      | 933/278                                  | -                             | -                                        | -                   |
| 331070                    | -      | 0.0003               | 10                     | 1                      | -                           | -           | XCV0285                      | 884/327                                  | -                             | -                                        | -                   |
| 332993                    | +      | 0.0000               | 9                      | 1                      | XCV0287                     | 0           | -                            | -                                        | XCV0286                       | 67/939                                   | -                   |
| 337456                    | +      | 0.0001               | 13                     | 3                      | XCV0293                     | 22          | -                            | -                                        | -                             | -                                        | -                   |
| 338466                    | -      | 0.0057               | 5                      | 2                      | -                           | -           | XCV0294                      | 940/259                                  | -                             | -                                        | -                   |
| 341742                    | -      | 0.0051               | 5                      | 2                      | XCV0296                     | 23          | -                            | -                                        | -                             | -                                        | -                   |
| 341927                    | +      | 0.0000               | 12                     | 0                      | XCV0297                     | 26          | -                            | -                                        | -                             | -                                        | -                   |
| 344260                    | -      | 0.0000               | 27                     | 4                      | XCV0299                     | 26          | -                            | -                                        | -                             | -                                        | -                   |
| 347202                    | -      | 0.0014               | 4                      | 0                      | -                           | -           | XCV0300                      | 99/2498                                  | -                             | -                                        | -                   |
| 347842                    | -      | 0.0030               | 5                      | 0                      | -                           | -           | -                            | -                                        | -                             | -                                        | +                   |
| 348352                    | +      | 0.0081               | 12                     | 5                      | -                           | -           | -                            | -                                        | XCV0302                       | 16/454                                   | -                   |
| 358119                    | -      | 0.0000               | 13                     | 3                      | XCV0313                     | 70          | -                            | -                                        | -                             | -                                        | -                   |

<sup>a</sup>, TSS position on the *Xcv* chromosome and the plasmid (pXCV183; marked with #), respectively. <sup>b</sup>, p-value indicates the significance of the annotated TSS (see METHODS). <sup>c</sup>, number of read starts at TSS position. <sup>d</sup>, TSS classification and the corresponding CDS. <sup>e</sup>, distance of the TSS to annotated start and stop codon of the corresponding CDS. <sup>f</sup>, a TSS is classified as orphan (+) if it is neither classified as primary, internal nor antisense TSS.

| TSS position <sup>a</sup> | Strand | p-value <sup>b</sup> | Library 2 <sup>c</sup> | Library 1 <sup>c</sup> | Primary <sup>d</sup> to CDS | 5' UTR (bp) | Internal <sup>d</sup> to CDS | Distance to start/stop <sup>e</sup> (bp) | Antisense <sup>d</sup> to CDS | Distance to start/stop <sup>e</sup> (bp) | Orphan <sup>f</sup> |
|---------------------------|--------|----------------------|------------------------|------------------------|-----------------------------|-------------|------------------------------|------------------------------------------|-------------------------------|------------------------------------------|---------------------|
| 369663                    | +      | 0.0028               | 3                      | 0                      | -                           | -           | XCV0322                      | 30/833                                   | -                             | -                                        | -                   |
| 375494                    | -      | 0.0081               | 3                      | 0                      | -                           | -           | XCV0327                      | 24/425                                   | XCV0328                       | 90/1007                                  | -                   |
| 377721                    | +      | 0.0023               | 4                      | 0                      | XCV0330                     | 3           | -                            | -                                        | -                             | -                                        | -                   |
| 404292                    | -      | 0.0135               | 3                      | 1                      | XCV0352                     | 127         | XCV0353                      | 512/0                                    | -                             | -                                        | -                   |
| 405223                    | -      | 0.0008               | 6                      | 1                      | -                           | -           | XCV0354                      | 769/88                                   | -                             | -                                        | -                   |
| 405567                    | +      | 0.0000               | 162                    | 23                     | -                           | -           | -                            | -                                        | XCV0354                       | 425/432                                  | -                   |
| 406317                    | -      | 0.0006               | 19                     | 10                     | XCV0355                     | 29          | -                            | -                                        | -                             | -                                        | -                   |
| 411941                    | +      | 0.0150               | 3                      | 1                      | XCV0359                     | 6           | -                            | -                                        | -                             | -                                        | -                   |
| 428338                    | -      | 0.0000               | 112                    | 12                     | XCV0374                     | 48          | -                            | -                                        | -                             | -                                        | -                   |
| 429323                    | -      | 0.0000               | 14                     | 1                      | -                           | -           | XCV0375                      | 153/806                                  | -                             | -                                        | -                   |
| 436669                    | +      | 0.0180               | 4                      | 0                      | -                           | -           | XCV0383                      | 11/1368                                  | -                             | -                                        | -                   |
| 441623                    | -      | 0.0130               | 4                      | 0                      | -                           | -           | XCV0387                      | 26/879                                   | -                             | -                                        | -                   |
| 441720                    | +      | 0.0000               | 11                     | 0                      | XCV0388                     | 30          | -                            | -                                        | XCV0387                       | 71/976                                   | -                   |
| 447445                    | -      | 0.0001               | 6                      | 2                      | XCV0392                     | 52          | -                            | -                                        | -                             | -                                        | -                   |
| 448031                    | -      | 0.0000               | 12                     | 2                      | XCV0393                     | 23          | -                            | -                                        | -                             | -                                        | -                   |
| 448950                    | +      | 0.0098               | 3                      | 0                      | XCV0395                     | 226         | XCV0394                      | 784/172                                  | -                             | -                                        | -                   |
| 449748                    | +      | 0.0205               | 5                      | 1                      | XCV0396                     | 23          | -                            | -                                        | -                             | -                                        | -                   |
| 453984                    | -      | 0.0000               | 24                     | 7                      | -                           | -           | XCV0400                      | 168/758                                  | -                             | -                                        | -                   |
| 455880                    | -      | 0.0012               | 5                      | 1                      | XCV0402                     | 24          | -                            | -                                        | -                             | -                                        | -                   |
| 458086                    | -      | 0.0001               | 6                      | 0                      | -                           | -           | -                            | -                                        | -                             | -                                        | +                   |
| 462619                    | +      | 0.0014               | 4                      | 0                      | -                           | -           | -                            | -                                        | XCV0411                       | 2250/167                                 | -                   |
| 475337                    | -      | 0.0022               | 3                      | 0                      | -                           | -           | XCV0425                      | 899/1020                                 | -                             | -                                        | -                   |
| 477343                    | -      | 0.0002               | 8                      | 0                      | XCV0426                     | 25          | -                            | -                                        | -                             | -                                        | -                   |
| 477496                    | +      | 0.0000               | 22                     | 3                      | XCV0427                     | 37          | -                            | -                                        | -                             | -                                        | -                   |
| 485143                    | -      | 0.0000               | 13                     | 0                      | -                           | -           | -                            | -                                        | XCV0435                       | 1914/94                                  | -                   |
| 486264                    | -      | 0.0059               | 4                      | 0                      | XCV0436                     | 140         | -                            | -                                        | -                             | -                                        | -                   |
| 486511                    | +      | 0.0005               | 5                      | 0                      | -                           | -           | -                            | -                                        | -                             | -                                        | +                   |
| 487914                    | -      | 0.0323               | 3                      | 1                      | -                           | -           | -                            | -                                        | XCV0437                       | 725/909                                  | -                   |
| 488081                    | +      | 0.0001               | 7                      | 0                      | -                           | -           | XCV0437                      | 892/742                                  | -                             | -                                        | -                   |
| 522402                    | -      | 0.0002               | 10                     | 0                      | -                           | -           | -                            | -                                        | XCV0462                       | 245/183                                  | -                   |
| 530343                    | +      | 0.0000               | 9                      | 1                      | -                           | -           | XCV0468                      | 153/356                                  | -                             | -                                        | -                   |
| 532431                    | -      | 0.0120               | 6                      | 2                      | -                           | -           | XCV0470                      | 69/1289                                  | -                             | -                                        | -                   |
| 532651                    | -      | 0.0025               | 5                      | 0                      | XCV0470                     | 151         | -                            | -                                        | -                             | -                                        | -                   |
| 532770                    | +      | 0.0009               | 8                      | 1                      | XCV0471                     | 0           | -                            | -                                        | -                             | -                                        | -                   |
| 533893                    | +      | 0.0033               | 6                      | 0                      | -                           | -           | -                            | -                                        | XCV0472                       | 302/36                                   | -                   |
| 537353                    | -      | 0.0066               | 4                      | 0                      | XCV0475                     | 32          | XCV0476                      | 1049/36                                  | -                             | -                                        | -                   |
| 548017                    | +      | 0.0016               | 3                      | 0                      | XCV0483                     | 96          | -                            | -                                        | -                             | -                                        | -                   |
| 557964                    | +      | 0.0057               | 3                      | 0                      | -                           | -           | XCV0493                      | 25/922                                   | -                             | -                                        | -                   |
| 558968                    | -      | 0.0002               | 8                      | 1                      | -                           | -           | XCV0494                      | 432/50                                   | XCV0493                       | 1029/82                                  | -                   |
| 568795                    | +      | 0.0038               | 5                      | 1                      | XCV0504                     | 27          | -                            | -                                        | -                             | -                                        | -                   |
| 573662                    | +      | 0.0040               | 3                      | 0                      | XCV0509                     | 53          | XCV0508                      | 156/50                                   | -                             | -                                        | -                   |
| 581801                    | +      | 0.0005               | 4                      | 0                      | XCV0514                     | 94          | -                            | -                                        | -                             | -                                        | -                   |
| 585332                    | +      | 0.0311               | 8                      | 5                      | XCV0518                     | 0           | XCV0517                      | 790/4                                    | -                             | -                                        | -                   |
| 586733                    | -      | 0.0003               | 8                      | 0                      | -                           | -           | XCV0519                      | 327/362                                  | -                             | -                                        | -                   |
| 587078                    | -      | 0.0000               | 62                     | 8                      | XCV0519                     | 18          | -                            | -                                        | -                             | -                                        | -                   |
| 587168                    | +      | 0.0000               | 39                     | 0                      | XCV0520                     | 30          | -                            | -                                        | -                             | -                                        | -                   |
| 587395                    | -      | 0.0439               | 3                      | 0                      | -                           | -           | -                            | -                                        | XCV0520                       | 197/594                                  | -                   |
| 589427                    | -      | 0.0000               | 10                     | 0                      | -                           | -           | XCV0522                      | 42/650                                   | -                             | -                                        | -                   |
| 589525                    | +      | 0.0000               | 73                     | 23                     | XCV0523                     | 85          | -                            | -                                        | XCV0522                       | 56/748                                   | -                   |
| 590048                    | -      | 0.0012               | 10                     | 0                      | -                           | -           | -                            | -                                        | XCV0523<br>XCV0524            | 438/13<br>7/382                          | -                   |
| 590956                    | +      | 0.0000               | 24                     | 1                      | XCV0525                     | 24          | -                            | -                                        | -                             | -                                        | -                   |
| 592178                    | +      | 0.0000               | 18                     | 5                      | XCV0527                     | 24          | -                            | -                                        | -                             | -                                        | -                   |
| 598012                    | -      | 0.0331               | 4                      | 2                      | XCV0531                     | 22          | -                            | -                                        | XCV0532                       | 86/853                                   | -                   |

<sup>a</sup>, TSS position on the *Xcv* chromosome and the plasmid (pXCV183; marked with #), respectively. <sup>b</sup>, p-value indicates the significance of the annotated TSS (see METHODS). <sup>c</sup>, number of read starts at TSS position. <sup>d</sup>, TSS classification and the corresponding CDS. <sup>e</sup>, distance of the TSS to annotated start and stop codon of the corresponding CDS. <sup>f</sup>, a TSS is classified as orphan (+) if it is neither classified as primary, internal nor antisense TSS.

| TSS position <sup>a</sup> | Strand | p-value <sup>b</sup> | Library 2 <sup>c</sup> | Library 1 <sup>c</sup> | Primary <sup>d</sup> to CDS | 5' UTR (bp) | Internal <sup>d</sup> to CDS | Distance to start/stop <sup>e</sup> (bp) | Antisense <sup>d</sup> to CDS | Distance to start/stop <sup>e</sup> (bp) | Orphan <sup>f</sup> |
|---------------------------|--------|----------------------|------------------------|------------------------|-----------------------------|-------------|------------------------------|------------------------------------------|-------------------------------|------------------------------------------|---------------------|
| 599405                    | +      | 0.0000               | 18                     | 5                      | XCV0534                     | 0           | -                            | -                                        | -                             | -                                        | -                   |
| 602321                    | +      | 0.0000               | 16                     | 1                      | -                           | -           | XCV0537                      | 36/887                                   | -                             | -                                        | -                   |
| 605417                    | -      | 0.0000               | 11                     | 1                      | -                           | -           | -                            | -                                        | -                             | -                                        | +                   |
| 616013                    | -      | 0.0182               | 4                      | 0                      | XCV0547                     | 25          | -                            | -                                        | XCV0548                       | 49/663                                   | -                   |
| 616018                    | -      | 0.0369               | 3                      | 0                      | XCV0547                     | 30          | -                            | -                                        | XCV0548                       | 44/658                                   | -                   |
| 624601                    | -      | 0.0081               | 3                      | 1                      | XCV0556                     | 46          | -                            | -                                        | -                             | -                                        | -                   |
| 629187                    | +      | 0.0177               | 3                      | 1                      | XCV0561                     | 39          | -                            | -                                        | -                             | -                                        | -                   |
| 633751                    | -      | 0.0002               | 8                      | 2                      | XCV0566                     | 21          | -                            | -                                        | -                             | -                                        | -                   |
| 636699                    | -      | 0.0000               | 7                      | 0                      | -                           | -           | XCV0567                      | 194/2121                                 | -                             | -                                        | -                   |
| 647837                    | +      | 0.0000               | 18                     | 0                      | XCV0574                     | 192         | -                            | -                                        | -                             | -                                        | -                   |
| 654736                    | +      | 0.0074               | 4                      | 0                      | -                           | -           | -                            | -                                        | -                             | -                                        | +                   |
| 656637                    | +      | 0.0079               | 6                      | 2                      | -                           | -           | XCV0579                      | 42/2822                                  | -                             | -                                        | -                   |
| 660302                    | +      | 0.0000               | 12                     | 2                      | -                           | -           | -                            | -                                        | -                             | -                                        | +                   |
| 660601                    | -      | 0.0000               | 8                      | 0                      | -                           | -           | -                            | -                                        | XCV0581                       | 42/1880                                  | -                   |
| 668117                    | -      | 0.0002               | 6                      | 0                      | XCV0586                     | 52          | -                            | -                                        | XCV0587                       | 83/670                                   | -                   |
| 687581                    | +      | 0.0000               | 24                     | 2                      | -                           | -           | XCV0608                      | 268/1051                                 | -                             | -                                        | -                   |
| 689806                    | -      | 0.0185               | 11                     | 0                      | -                           | -           | -                            | -                                        | XCV0610                       | 760/772                                  | -                   |
| 690527                    | +      | 0.0000               | 15                     | 4                      | XCV0611                     | 54          | XCV0610                      | 1481/51                                  | -                             | -                                        | -                   |
| 692255                    | +      | 0.0469               | 3                      | 0                      | -                           | -           | XCV0611                      | 1674/1010                                | -                             | -                                        | -                   |
| 693668                    | +      | 0.0006               | 4                      | 0                      | XCV0612                     | 26          | -                            | -                                        | -                             | -                                        | -                   |
| 694560                    | -      | 0.0169               | 3                      | 0                      | -                           | -           | -                            | -                                        | XCV0612                       | 866/111                                  | -                   |
| 698328                    | +      | 0.0000               | 14                     | 2                      | XCV0616                     | 34          | -                            | -                                        | -                             | -                                        | -                   |
| 703418                    | -      | 0.0086               | 3                      | 0                      | -                           | -           | -                            | -                                        | -                             | -                                        | +                   |
| 707695                    | +      | 0.0343               | 4                      | 1                      | -                           | -           | -                            | -                                        | XCV0625<br>XCV0624            | 838/8<br>79/258                          | -                   |
| 707716                    | -      | 0.0000               | 13                     | 1                      | XCV0624                     | 100         | XCV0625                      | 817/13                                   | -                             | -                                        | -                   |
| 713610                    | -      | 0.0193               | 3                      | 0                      | -                           | -           | XCV0632                      | 9/1523                                   | -                             | -                                        | -                   |
| 720541                    | -      | 0.0024               | 3                      | 0                      | XCV0639                     | 65          | -                            | -                                        | -                             | -                                        | -                   |
| 725332                    | +      | 0.0013               | 10                     | 3                      | -                           | -           | -                            | -                                        | XCV0642                       | 585/1994                                 | -                   |
| 732826                    | +      | 0.0424               | 4                      | 0                      | -                           | -           | XCV0648                      | 43/334                                   | -                             | -                                        | -                   |
| 736976                    | -      | 0.0027               | 3                      | 0                      | -                           | -           | XCV0653                      | 8/789                                    | -                             | -                                        | -                   |
| 738232                    | +      | 0.0005               | 12                     | 4                      | XCV0656                     | 25          | -                            | -                                        | -                             | -                                        | -                   |
| 739844                    | -      | 0.0122               | 3                      | 0                      | -                           | -           | XCV0657                      | 862/121                                  | -                             | -                                        | -                   |
| 740729                    | -      | 0.0000               | 12                     | 2                      | XCV0657                     | 23          | -                            | -                                        | -                             | -                                        | -                   |
| 749385                    | -      | 0.0005               | 6                      | 1                      | -                           | -           | XCV0665                      | 168/956                                  | -                             | -                                        | -                   |
| 752821                    | -      | 0.0000               | 16                     | 1                      | XCV0666                     | 23          | -                            | -                                        | -                             | -                                        | -                   |
| 758448                    | -      | 0.0056               | 5                      | 0                      | XCV0669                     | 34          | -                            | -                                        | -                             | -                                        | -                   |
| 758878                    | +      | 0.0469               | 7                      | 0                      | -                           | -           | -                            | -                                        | XCV0670                       | 1215/212                                 | -                   |
| 763156                    | +      | 0.0000               | 24                     | 1                      | XCV0673                     | 23          | -                            | -                                        | -                             | -                                        | -                   |
| 765474                    | +      | 0.0141               | 3                      | 0                      | XCV0675                     | 282         | -                            | -                                        | -                             | -                                        | -                   |
| 765583                    | +      | 0.0143               | 3                      | 0                      | XCV0675                     | 173         | -                            | -                                        | -                             | -                                        | -                   |
| 770365                    | +      | 0.0023               | 4                      | 0                      | XCV0679                     | 0           | -                            | -                                        | -                             | -                                        | -                   |
| 772840                    | +      | 0.0000               | 14                     | 0                      | -                           | -           | XCV0681                      | 177/962                                  | -                             | -                                        | -                   |
| 775297                    | -      | 0.0033               | 4                      | 0                      | XCV0683                     | 25          | -                            | -                                        | -                             | -                                        | -                   |
| 775992                    | +      | 0.0000               | 13                     | 2                      | XCV0685                     | 22          | -                            | -                                        | -                             | -                                        | -                   |
| 779535                    | -      | 0.0044               | 8                      | 3                      | XCV0686                     | 0           | -                            | -                                        | -                             | -                                        | -                   |
| 779651                    | +      | 0.0041               | 4                      | 1                      | XCV0687                     | 29          | -                            | -                                        | -                             | -                                        | -                   |
| 781259                    | -      | 0.0026               | 4                      | 0                      | -                           | -           | -                            | -                                        | XCV0687                       | 1579/490                                 | -                   |
| 782120                    | +      | 0.0002               | 7                      | 0                      | XCV0688                     | 0           | -                            | -                                        | -                             | -                                        | -                   |
| 782575                    | +      | 0.0000               | 13                     | 2                      | XCV0689                     | 244         | -                            | -                                        | -                             | -                                        | -                   |
| 785619                    | +      | 0.0000               | 18                     | 2                      | XCV0692                     | 17          | -                            | -                                        | -                             | -                                        | -                   |
| 793698                    | +      | 0.0000               | 11                     | 1                      | XCV0700                     | 23          | -                            | -                                        | -                             | -                                        | -                   |
| 799920                    | -      | 0.0039               | 6                      | 2                      | -                           | -           | XCV0705                      | 769/88                                   | XCV0704                       | 942/49                                   | -                   |
| 800264                    | +      | 0.0000               | 162                    | 23                     | -                           | -           | -                            | -                                        | XCV0705                       | 425/432                                  | -                   |

<sup>a</sup>, TSS position on the *Xcv* chromosome and the plasmid (pXCV183; marked with #), respectively. <sup>b</sup>, p-value indicates the significance of the annotated TSS (see METHODS). <sup>c</sup>, number of read starts at TSS position. <sup>d</sup>, TSS classification and the corresponding CDS. <sup>e</sup>, distance of the TSS to annotated start and stop codon of the corresponding CDS. <sup>f</sup>, a TSS is classified as orphan (+) if it is neither classified as primary, internal nor antisense TSS.

| TSS position <sup>a</sup> | Strand | p-value <sup>b</sup> | Library 2 <sup>c</sup> | Library 1 <sup>c</sup> | Primary <sup>d</sup> to CDS | 5' UTR (bp) | Internal <sup>d</sup> to CDS | Distance to start/stop <sup>e</sup> (bp) | Antisense <sup>d</sup> to CDS | Distance to start/stop <sup>e</sup> (bp) | Orphan <sup>f</sup> |
|---------------------------|--------|----------------------|------------------------|------------------------|-----------------------------|-------------|------------------------------|------------------------------------------|-------------------------------|------------------------------------------|---------------------|
| 801014                    | -      | 0.0004               | 19                     | 10                     | XCV0706                     | 29          | -                            | -                                        | -                             | -                                        | -                   |
| 815890                    | +      | 0.0058               | 3                      | 0                      | -                           | -           | XCV0717                      | 436/607                                  | -                             | -                                        | -                   |
| 823961                    | +      | 0.0108               | 4                      | 0                      | XCV0723                     | 0           | -                            | -                                        | -                             | -                                        | -                   |
| 826922                    | +      | 0.0008               | 13                     | 6                      | XCV0725                     | 38          | -                            | -                                        | -                             | -                                        | -                   |
| 829714                    | +      | 0.0000               | 24                     | 4                      | XCV0728                     | 266         | XCV0727                      | 219/275                                  | -                             | -                                        | -                   |
| 837085                    | -      | 0.0214               | 3                      | 0                      | XCV0733                     | 26          | -                            | -                                        | -                             | -                                        | -                   |
| 842923                    | +      | 0.0015               | 4                      | 0                      | XCV0739                     | 38          | -                            | -                                        | -                             | -                                        | -                   |
| 844848                    | +      | 0.0000               | 25                     | 2                      | XCV0741                     | 21          | -                            | -                                        | -                             | -                                        | -                   |
| 847069                    | +      | 0.0177               | 3                      | 1                      | -                           | -           | XCV0743                      | 91/391                                   | -                             | -                                        | -                   |
| 847628                    | +      | 0.0000               | 30                     | 1                      | XCV0744                     | 117         | -                            | -                                        | -                             | -                                        | -                   |
| 851592                    | +      | 0.0000               | 8                      | 0                      | XCV0747                     | 0           | -                            | -                                        | -                             | -                                        | -                   |
| 853751                    | +      | 0.0008               | 4                      | 0                      | -                           | -           | XCV0749                      | 670/511                                  | -                             | -                                        | -                   |
| 873841                    | +      | 0.0010               | 4                      | 0                      | XCV0767                     | 31          | -                            | -                                        | -                             | -                                        | -                   |
| 884284                    | -      | 0.0299               | 4                      | 0                      | XCV0773                     | 0           | -                            | -                                        | -                             | -                                        | -                   |
| 893392                    | +      | 0.0005               | 6                      | 0                      | -                           | -           | XCV0781                      | 42/620                                   | -                             | -                                        | -                   |
| 898261                    | -      | 0.0417               | 6                      | 0                      | XCV0784                     | 24          | -                            | -                                        | XCV0785                       | 54/1151                                  | -                   |
| 900510                    | +      | 0.0380               | 4                      | 0                      | -                           | -           | XCV0787                      | 97/292                                   | -                             | -                                        | -                   |
| 905920                    | -      | 0.0007               | 5                      | 0                      | XCV0792                     | 60          | -                            | -                                        | -                             | -                                        | -                   |
| 906061                    | +      | 0.0000               | 16                     | 3                      | XCV0793                     | 24          | -                            | -                                        | -                             | -                                        | -                   |
| 906749                    | +      | 0.0000               | 10                     | 0                      | XCV0794                     | 31          | -                            | -                                        | -                             | -                                        | -                   |
| 907111                    | +      | 0.0010               | 5                      | 0                      | -                           | -           | XCV0794                      | 331/919                                  | -                             | -                                        | -                   |
| 907734                    | +      | 0.0007               | 6                      | 0                      | -                           | -           | XCV0794                      | 954/296                                  | -                             | -                                        | -                   |
| 931121                    | -      | 0.0030               | 3                      | 0                      | -                           | -           | XCV0816                      | 41/324                                   | -                             | -                                        | -                   |
| 933943                    | +      | 0.0000               | 86                     | 27                     | -                           | -           | -                            | -                                        | -                             | -                                        | +                   |
| 935355                    | -      | 0.0000               | 11                     | 1                      | XCV0819<br>XCV0820          | 264<br>16   | -                            | -                                        | -                             | -                                        | -                   |
| 936154                    | -      | 0.0000               | 12                     | 1                      | -                           | -           | XCV0821                      | 15/764                                   | -                             | -                                        | -                   |
| 936452                    | +      | 0.0048               | 11                     | 1                      | XCV0822                     | 18          | -                            | -                                        | -                             | -                                        | -                   |
| 936455                    | +      | 0.0028               | 23                     | 4                      | XCV0822                     | 15          | -                            | -                                        | -                             | -                                        | -                   |
| 946406                    | +      | 0.0206               | 3                      | 0                      | -                           | -           | XCV0830                      | 571/721                                  | -                             | -                                        | -                   |
| 951830                    | +      | 0.0001               | 10                     | 2                      | XCV0835                     | 181         | -                            | -                                        | -                             | -                                        | -                   |
| 953433                    | +      | 0.0005               | 12                     | 1                      | XCV0836                     | 51          | -                            | -                                        | -                             | -                                        | -                   |
| 956025                    | +      | 0.0000               | 14                     | 0                      | XCV0839                     | 101         | -                            | -                                        | -                             | -                                        | -                   |
| 956388                    | +      | 0.0055               | 5                      | 0                      | -                           | -           | XCV0839                      | 262/2473                                 | -                             | -                                        | -                   |
| 959187                    | +      | 0.0001               | 9                      | 2                      | XCV0840                     | 0           | -                            | -                                        | -                             | -                                        | -                   |
| 963192                    | -      | 0.0156               | 3                      | 1                      | XCV0843                     | 22          | -                            | -                                        | -                             | -                                        | -                   |
| 963547                    | +      | 0.0026               | 4                      | 0                      | XCV0844                     | 20          | -                            | -                                        | -                             | -                                        | -                   |
| 964753                    | +      | 0.0000               | 15                     | 1                      | XCV0845                     | 31          | -                            | -                                        | -                             | -                                        | -                   |
| 973152                    | +      | 0.0000               | 80                     | 8                      | -                           | -           | -                            | -                                        | -                             | -                                        | +                   |
| 973732                    | +      | 0.0349               | 3                      | 0                      | -                           | -           | XCV0854                      | 279/650                                  | -                             | -                                        | -                   |
| 976232                    | +      | 0.0206               | 3                      | 0                      | -                           | -           | -                            | -                                        | XCV0856                       | 647/792                                  | -                   |
| 977026                    | -      | 0.0014               | 5                      | 0                      | XCV0856                     | 147         | -                            | -                                        | -                             | -                                        | -                   |
| 994684                    | -      | 0.0007               | 4                      | 0                      | XCV0865                     | 33          | -                            | -                                        | -                             | -                                        | -                   |
| 997844                    | -      | 0.0000               | 21                     | 0                      | XCV0868                     | 0           | -                            | -                                        | -                             | -                                        | -                   |
| 1003187                   | -      | 0.0005               | 5                      | 0                      | XCV0871                     | 27          | -                            | -                                        | -                             | -                                        | -                   |
| 1017977                   | +      | 0.0000               | 67                     | 8                      | XCV0887                     | 22          | -                            | -                                        | -                             | -                                        | -                   |
| 1021354                   | +      | 0.0006               | 11                     | 3                      | XCV0890                     | 73          | -                            | -                                        | -                             | -                                        | -                   |
| 1024293                   | +      | 0.0000               | 11                     | 2                      | XCV0894                     | 27          | -                            | -                                        | -                             | -                                        | -                   |
| 1028253                   | -      | 0.0039               | 3                      | 0                      | XCV0899                     | 0           | -                            | -                                        | -                             | -                                        | -                   |
| 1029078                   | -      | 0.0008               | 5                      | 0                      | XCV0900                     | 0           | -                            | -                                        | -                             | -                                        | -                   |
| 1031658                   | -      | 0.0108               | 3                      | 1                      | XCV0902                     | 80          | XCV0903                      | 2346/80                                  | -                             | -                                        | -                   |
| 1034027                   | -      | 0.0212               | 4                      | 2                      | XCV0903                     | 23          | -                            | -                                        | -                             | -                                        | -                   |
| 1036242                   | -      | 0.0129               | 5                      | 0                      | XCV0906                     | 23          | -                            | -                                        | -                             | -                                        | -                   |
| 1036560                   | +      | 0.0006               | 6                      | 0                      | XCV0907                     | 0           | -                            | -                                        | -                             | -                                        | -                   |

<sup>a</sup>, TSS position on the *Xcv* chromosome and the plasmid (pXCV183; marked with #), respectively. <sup>b</sup>, p-value indicates the significance of the annotated TSS (see METHODS). <sup>c</sup>, number of read starts at TSS position. <sup>d</sup>, TSS classification and the corresponding CDS. <sup>e</sup>, distance of the TSS to annotated start and stop codon of the corresponding CDS. <sup>f</sup>, a TSS is classified as orphan (+) if it is neither classified as primary, internal nor antisense TSS.



| TSS position <sup>a</sup> | Strand | p-value <sup>b</sup> | Library 2 <sup>c</sup> | Library 1 <sup>c</sup> | Primary <sup>d</sup> to CDS | 5' UTR (bp) | Internal <sup>d</sup> to CDS | Distance to start/stop <sup>e</sup> (bp) | Antisense <sup>d</sup> to CDS | Distance to start/stop <sup>e</sup> (bp) | Orphan <sup>f</sup> |
|---------------------------|--------|----------------------|------------------------|------------------------|-----------------------------|-------------|------------------------------|------------------------------------------|-------------------------------|------------------------------------------|---------------------|
| 1041488                   | -      | 0.0166               | 3                      | 1                      | -                           | -           | -                            | -                                        | XCV0911                       | 1007/21                                  | -                   |
| 1042407                   | +      | 0.0004               | 7                      | 1                      | XCV0913                     | 180         | -                            | -                                        | XCV0912                       | 54/725                                   | -                   |
| 1050250                   | -      | 0.0003               | 6                      | 0                      | -                           | -           | XCV0920                      | 152/429                                  | -                             | -                                        | -                   |
| 1052158                   | -      | 0.0193               | 3                      | 0                      | XCV0922                     | 21          | -                            | -                                        | -                             | -                                        | -                   |
| 1052229                   | +      | 0.0095               | 4                      | 1                      | XCV0923                     | 32          | -                            | -                                        | XCV0922                       | 92/994                                   | -                   |
| 1055953                   | -      | 0.0005               | 5                      | 0                      | XCV0926                     | 26          | -                            | -                                        | -                             | -                                        | -                   |
| 1059633                   | -      | 0.0003               | 12                     | 3                      | XCV0930                     | 23          | -                            | -                                        | -                             | -                                        | -                   |
| 1064780                   | +      | 0.0131               | 3                      | 1                      | XCV0937                     | 26          | -                            | -                                        | -                             | -                                        | -                   |
| 1067662                   | -      | 0.0119               | 3                      | 0                      | -                           | -           | XCV0939                      | 104/861                                  | -                             | -                                        | -                   |
| 1073410                   | +      | 0.0000               | 17                     | 0                      | XCV0945                     | 19          | -                            | -                                        | -                             | -                                        | -                   |
| 1086476                   | +      | 0.0025               | 4                      | 0                      | -                           | -           | XCV0957                      | 74/585                                   | -                             | -                                        | -                   |
| 1095646                   | -      | 0.0012               | 4                      | 0                      | -                           | -           | -                            | -                                        | XCV0965<br>XCV0964            | 12/1205<br>334/86                        | -                   |
| 1102907                   | -      | 0.0272               | 3                      | 1                      | XCV0973                     | 0           | -                            | -                                        | -                             | -                                        | -                   |
| 1107405                   | +      | 0.0024               | 4                      | 0                      | XCV0977                     | 35          | -                            | -                                        | XCV0976                       | 31/1326                                  | -                   |
| 1107410                   | -      | 0.0000               | 8                      | 0                      | XCV0976                     | 36          | -                            | -                                        | XCV0977                       | 30/1715                                  | -                   |
| 1110383                   | +      | 0.0004               | 16                     | 5                      | -                           | -           | XCV0979                      | 623/261                                  | -                             | -                                        | -                   |
| 1114497                   | +      | 0.0001               | 8                      | 0                      | -                           | -           | -                            | -                                        | -                             | -                                        | +                   |
| 1116481                   | +      | 0.0001               | 7                      | 2                      | XCV0986                     | 259         | XCV0985                      | 162/242                                  | -                             | -                                        | -                   |
| 1117349                   | +      | 0.0000               | 9                      | 1                      | XCV0987                     | 147         | -                            | -                                        | -                             | -                                        | -                   |
| 1117882                   | +      | 0.0012               | 7                      | 2                      | XCV0988                     | 46          | XCV0987                      | 386/39                                   | -                             | -                                        | -                   |
| 1118456                   | +      | 0.0303               | 5                      | 0                      | -                           | -           | XCV0988                      | 528/167                                  | -                             | -                                        | -                   |
| 1118678                   | +      | 0.0000               | 46                     | 10                     | -                           | -           | -                            | -                                        | -                             | -                                        | +                   |
| 1120586                   | +      | 0.0007               | 4                      | 1                      | -                           | -           | XCV0991                      | 172/3976                                 | -                             | -                                        | -                   |
| 1122235                   | +      | 0.0042               | 3                      | 1                      | -                           | -           | XCV0991                      | 1821/2327                                | -                             | -                                        | -                   |
| 1122779                   | +      | 0.0000               | 26                     | 1                      | -                           | -           | XCV0991                      | 2365/1783                                | -                             | -                                        | -                   |
| 1128623                   | +      | 0.0074               | 5                      | 1                      | -                           | -           | XCV0992                      | 3957/254                                 | -                             | -                                        | -                   |
| 1129024                   | +      | 0.0000               | 10                     | 1                      | XCV0993                     | 75          | -                            | -                                        | -                             | -                                        | -                   |
| 1130406                   | +      | 0.0005               | 5                      | 0                      | -                           | -           | XCV0995                      | 315/1799                                 | -                             | -                                        | -                   |
| 1134713                   | -      | 0.0133               | 3                      | 0                      | -                           | -           | -                            | -                                        | -                             | -                                        | +                   |
| 1135113                   | +      | 0.0030               | 15                     | 12                     | -                           | -           | -                            | -                                        | -                             | -                                        | +                   |
| 1137159                   | +      | 0.0000               | 79                     | 14                     | XCV1002                     | 180         | XCV1001                      | 130/166                                  | -                             | -                                        | -                   |
| 1137964                   | +      | 0.0008               | 9                      | 2                      | XCV1003                     | 209         | XCV1002                      | 625/199                                  | -                             | -                                        | -                   |
| 1142119                   | +      | 0.0000               | 38                     | 13                     | XCV1013                     | 108         | -                            | -                                        | -                             | -                                        | -                   |
| 1146342                   | +      | 0.0000               | 37                     | 12                     | -                           | -           | -                            | -                                        | -                             | -                                        | +                   |
| 1149059                   | +      | 0.0004               | 4                      | 1                      | XCV1024                     | 233         | XCV1023                      | 946/49                                   | -                             | -                                        | -                   |
| 1149619                   | +      | 0.0026               | 3                      | 0                      | XCV1025                     | 180         | XCV1024                      | 327/53                                   | -                             | -                                        | -                   |
| 1150093                   | +      | 0.0000               | 44                     | 3                      | XCV1026                     | 23          | XCV1025                      | 294/17                                   | -                             | -                                        | -                   |
| 1153493                   | +      | 0.0000               | 10                     | 1                      | XCV1028                     | 17          | -                            | -                                        | -                             | -                                        | -                   |
| 1160474                   | -      | 0.0000               | 13                     | 2                      | XCV1032                     | 43          | -                            | -                                        | -                             | -                                        | -                   |
| 1160640                   | +      | 0.0000               | 20                     | 1                      | XCV1033                     | 33          | -                            | -                                        | -                             | -                                        | -                   |
| 1162992                   | -      | 0.0000               | 35                     | 12                     | XCV1035                     | 22          | -                            | -                                        | -                             | -                                        | -                   |
| 1164003                   | -      | 0.0006               | 5                      | 0                      | XCV1036                     | 163         | -                            | -                                        | -                             | -                                        | -                   |
| 1168793                   | +      | 0.0000               | 17                     | 8                      | XCV1042                     | 80          | -                            | -                                        | -                             | -                                        | -                   |
| 1169205                   | +      | 0.0000               | 19                     | 3                      | -                           | -           | XCV1042                      | 332/762                                  | -                             | -                                        | -                   |
| 1170131                   | +      | 0.0000               | 16                     | 0                      | XCV1043                     | 32          | -                            | -                                        | -                             | -                                        | -                   |
| 1173134                   | -      | 0.0006               | 5                      | 0                      | XCV1046                     | 22          | -                            | -                                        | -                             | -                                        | -                   |
| 1177286                   | +      | 0.0126               | 3                      | 0                      | XCV1051                     | 145         | -                            | -                                        | -                             | -                                        | -                   |
| 1179872                   | -      | 0.0114               | 5                      | 2                      | XCV1052                     | 40          | -                            | -                                        | -                             | -                                        | -                   |
| 1184957                   | +      | 0.0000               | 12                     | 1                      | XCV1055                     | 25          | -                            | -                                        | -                             | -                                        | -                   |
| 1185123                   | -      | 0.0387               | 7                      | 2                      | -                           | -           | -                            | -                                        | XCV1055                       | 141/491                                  | -                   |
| 1189664                   | +      | 0.0048               | 5                      | 0                      | XCV1060                     | 99          | -                            | -                                        | -                             | -                                        | -                   |
| 1190312                   | +      | 0.0006               | 8                      | 2                      | XCV1061                     | 228         | XCV1060                      | 549/194                                  | -                             | -                                        | -                   |
| 1206581                   | -      | 0.0144               | 3                      | 0                      | -                           | -           | XCV1073                      | 42/1661                                  | XCV1074                       | 99/437                                   | -                   |

<sup>a</sup>, TSS position on the *Xcv* chromosome and the plasmid (pXCV183; marked with #), respectively. <sup>b</sup>, p-value indicates the significance of the annotated TSS (see METHODS). <sup>c</sup>, number of read starts at TSS position. <sup>d</sup>, TSS classification and the corresponding CDS. <sup>e</sup>, distance of the TSS to annotated start and stop codon of the corresponding CDS. <sup>f</sup>, a TSS is classified as orphan (+) if it is neither classified as primary, internal nor antisense TSS.

| TSS position <sup>a</sup> | Strand | p-value <sup>b</sup> | Library 2 <sup>c</sup> | Library 1 <sup>c</sup> | Primary <sup>d</sup> to CDS | 5' UTR (bp) | Internal <sup>d</sup> to CDS | Distance to start/stop <sup>e</sup> (bp) | Antisense <sup>d</sup> to CDS | Distance to start/stop <sup>e</sup> (bp) | Orphan <sup>f</sup> |
|---------------------------|--------|----------------------|------------------------|------------------------|-----------------------------|-------------|------------------------------|------------------------------------------|-------------------------------|------------------------------------------|---------------------|
| 1206687                   | +      | 0.0000               | 11                     | 1                      | -                           | -           | XCV1074                      | 7/331                                    | XCV1073                       | 64/1767                                  | -                   |
| 1207568                   | +      | 0.0000               | 8                      | 0                      | XCV1076                     | 72          | -                            | -                                        | -                             | -                                        | -                   |
| 1209562                   | -      | 0.0027               | 5                      | 0                      | XCV1077                     | 20          | -                            | -                                        | -                             | -                                        | -                   |
| 1209662                   | +      | 0.0017               | 10                     | 0                      | -                           | -           | -                            | -                                        | -                             | -                                        | +                   |
| 1217572                   | +      | 0.0134               | 3                      | 1                      | -                           | -           | XCV1083                      | 1641/827                                 | -                             | -                                        | -                   |
| 1218498                   | +      | 0.0000               | 46                     | 8                      | XCV1084                     | 118         | -                            | -                                        | -                             | -                                        | -                   |
| 1219137                   | -      | 0.0112               | 3                      | 0                      | -                           | -           | -                            | -                                        | -                             | -                                        | +                   |
| 1219503                   | +      | 0.0007               | 6                      | 1                      | XCV1085                     | 25          | -                            | -                                        | -                             | -                                        | -                   |
| 1223677                   | -      | 0.0046               | 3                      | 0                      | -                           | -           | XCV1087                      | 426/338                                  | -                             | -                                        | -                   |
| 1226768                   | -      | 0.0027               | 5                      | 1                      | XCV1091                     | 27          | -                            | -                                        | -                             | -                                        | -                   |
| 1227290                   | +      | 0.0000               | 10                     | 0                      | -                           | -           | XCV1092                      | 172/1306                                 | -                             | -                                        | -                   |
| 1233373                   | +      | 0.0000               | 19                     | 2                      | -                           | -           | XCV1098                      | 817/13                                   | -                             | -                                        | -                   |
| 1233578                   | +      | 0.0000               | 28                     | 5                      | -                           | -           | -                            | -                                        | -                             | -                                        | +                   |
| 1235373                   | +      | 0.0020               | 5                      | 1                      | -                           | -           | -                            | -                                        | -                             | -                                        | +                   |
| 1240320                   | +      | 0.0038               | 6                      | 1                      | XCV1107                     | 20          | -                            | -                                        | -                             | -                                        | -                   |
| 1242175                   | -      | 0.0000               | 91                     | 11                     | -                           | -           | -                            | -                                        | -                             | -                                        | +                   |
| 1244521                   | -      | 0.0000               | 16                     | 1                      | XCV1110                     | 22          | -                            | -                                        | -                             | -                                        | -                   |
| 1249118                   | +      | 0.0002               | 20                     | 9                      | XCV1118                     | 29          | XCV1117                      | 910/16                                   | -                             | -                                        | -                   |
| 1249868                   | -      | 0.0000               | 170                    | 21                     | -                           | -           | -                            | -                                        | XCV1119                       | 425/432                                  | -                   |
| 1250212                   | +      | 0.0041               | 5                      | 1                      | XCV1120                     | 153         | XCV1119                      | 769/88                                   | -                             | -                                        | -                   |
| 1257067                   | -      | 0.0053               | 3                      | 0                      | -                           | -           | XCV1126                      | 180/1334                                 | -                             | -                                        | -                   |
| 1257541                   | +      | 0.0001               | 14                     | 4                      | XCV1127                     | 21          | -                            | -                                        | -                             | -                                        | -                   |
| 1261798                   | -      | 0.0002               | 16                     | 6                      | XCV1131                     | 65          | XCV1132                      | 1884/65                                  | -                             | -                                        | -                   |
| 1265655                   | -      | 0.0171               | 3                      | 1                      | XCV1134                     | 0           | -                            | -                                        | XCV1135                       | 40/1807                                  | -                   |
| 1270936                   | +      | 0.0000               | 47                     | 4                      | -                           | -           | XCV1141                      | 37/517                                   | -                             | -                                        | -                   |
| 1272952                   | -      | 0.0053               | 3                      | 0                      | -                           | -           | -                            | -                                        | -                             | -                                        | +                   |
| 1273770                   | +      | 0.0000               | 36                     | 10                     | XCV1145                     | 23          | -                            | -                                        | -                             | -                                        | -                   |
| 1278951                   | +      | 0.0001               | 8                      | 0                      | XCV1150                     | 29          | -                            | -                                        | -                             | -                                        | -                   |
| 1284606                   | -      | 0.0088               | 4                      | 1                      | -                           | -           | XCV1155                      | 27/1619                                  | -                             | -                                        | -                   |
| 1287704                   | +      | 0.0032               | 3                      | 0                      | -                           | -           | XCV1158                      | 694/1897                                 | -                             | -                                        | -                   |
| 1295774                   | +      | 0.0131               | 4                      | 1                      | XCV1164                     | 42          | XCV1163                      | 308/12                                   | -                             | -                                        | -                   |
| 1298129                   | -      | 0.0224               | 3                      | 0                      | -                           | -           | -                            | -                                        | XCV1164                       | 2313/2585                                | -                   |
| 1309475                   | +      | 0.0005               | 8                      | 1                      | XCV1172                     | 65          | -                            | -                                        | XCV1171                       | 98/196                                   | -                   |
| 1312832                   | +      | 0.0002               | 9                      | 0                      | XCV1175                     | 61          | -                            | -                                        | -                             | -                                        | -                   |
| 1321929                   | -      | 0.0414               | 5                      | 0                      | XCV1181                     | 22          | -                            | -                                        | XCV1182                       | 50/637                                   | -                   |
| 1340207                   | +      | 0.0008               | 6                      | 1                      | XCV1198                     | 233         | XCV1197                      | 282/212                                  | -                             | -                                        | -                   |
| 1343656                   | +      | 0.0005               | 5                      | 0                      | XCV1202                     | 63          | -                            | -                                        | -                             | -                                        | -                   |
| 1364483                   | +      | 0.0191               | 5                      | 2                      | XCV1217                     | 20          | -                            | -                                        | -                             | -                                        | -                   |
| 1368267                   | -      | 0.0345               | 6                      | 3                      | XCV1221<br>XCV1222          | 249<br>19   | -                            | -                                        | -                             | -                                        | -                   |
| 1376702                   | +      | 0.0016               | 8                      | 2                      | -                           | -           | XCV1228                      | 90/857                                   | -                             | -                                        | -                   |
| 1381773                   | +      | 0.0121               | 3                      | 0                      | XCV1232                     | 23          | -                            | -                                        | -                             | -                                        | -                   |
| 1384583                   | -      | 0.0028               | 7                      | 2                      | XCV1233                     | 20          | -                            | -                                        | -                             | -                                        | -                   |
| 1384820                   | +      | 0.0000               | 17                     | 3                      | XCV1234                     | 46          | -                            | -                                        | -                             | -                                        | -                   |
| 1386923                   | +      | 0.0068               | 3                      | 0                      | -                           | -           | XCV1236                      | 66/1907                                  | -                             | -                                        | -                   |
| 1390988                   | -      | 0.0193               | 3                      | 0                      | -                           | -           | XCV1239                      | 35/150                                   | -                             | -                                        | -                   |
| 1399557                   | -      | 0.0435               | 4                      | 2                      | XCV1243                     | 291         | -                            | -                                        | -                             | -                                        | -                   |
| 1404809                   | +      | 0.0275               | 3                      | 0                      | XCV1247                     | 89          | -                            | -                                        | -                             | -                                        | -                   |
| 1411639                   | -      | 0.0000               | 18                     | 4                      | XCV1251                     | 22          | -                            | -                                        | -                             | -                                        | -                   |
| 1419087                   | +      | 0.0005               | 8                      | 1                      | XCV1260                     | 0           | -                            | -                                        | XCV1259                       | 78/833                                   | -                   |
| 1421227                   | +      | 0.0000               | 11                     | 0                      | XCV1262                     | 48          | -                            | -                                        | -                             | -                                        | -                   |
| 1424474                   | -      | 0.0060               | 4                      | 0                      | XCV1265                     | 171         | -                            | -                                        | -                             | -                                        | -                   |
| 1426111                   | -      | 0.0236               | 10                     | 0                      | XCV1268                     | 21          | -                            | -                                        | -                             | -                                        | -                   |
| 1429267                   | -      | 0.0016               | 4                      | 0                      | XCV1271                     | 24          | -                            | -                                        | -                             | -                                        | -                   |

<sup>a</sup>, TSS position on the *Xcv* chromosome and the plasmid (pXCV183; marked with #), respectively. <sup>b</sup>, p-value indicates the significance of the annotated TSS (see METHODS). <sup>c</sup>, number of read starts at TSS position. <sup>d</sup>, TSS classification and the corresponding CDS. <sup>e</sup>, distance of the TSS to annotated start and stop codon of the corresponding CDS. <sup>f</sup>, a TSS is classified as orphan (+) if it is neither classified as primary, internal nor antisense TSS.

| TSS position <sup>a</sup> | Strand | p-value <sup>b</sup> | Library 2 <sup>c</sup> | Library 1 <sup>c</sup> | Primary <sup>d</sup> to CDS | 5' UTR (bp) | Internal <sup>d</sup> to CDS | Distance to start/stop <sup>e</sup> (bp) | Antisense <sup>d</sup> to CDS | Distance to start/stop <sup>e</sup> (bp) | Orphan <sup>f</sup> |
|---------------------------|--------|----------------------|------------------------|------------------------|-----------------------------|-------------|------------------------------|------------------------------------------|-------------------------------|------------------------------------------|---------------------|
| 1433010                   | -      | 0.0000               | 18                     | 5                      | XCV1275                     | 29          | -                            | -                                        | -                             | -                                        | -                   |
| 1436219                   | -      | 0.0000               | 8                      | 0                      | XCV1279                     | 24          | -                            | -                                        | -                             | -                                        | -                   |
| 1437031                   | +      | 0.0023               | 6                      | 0                      | XCV1281                     | 28          | -                            | -                                        | XCV1280                       | 4/763                                    | -                   |
| 1437682                   | -      | 0.0023               | 3                      | 0                      | -                           | -           | XCV1282                      | 365/36                                   | -                             | -                                        | -                   |
| 1440046                   | -      | 0.0054               | 3                      | 0                      | -                           | -           | XCV1283                      | 964/1996                                 | -                             | -                                        | -                   |
| 1441077                   | -      | 0.0028               | 5                      | 0                      | XCV1283                     | 67          | -                            | -                                        | -                             | -                                        | -                   |
| 1443612                   | -      | 0.0000               | 49                     | 7                      | XCV1287                     | 41          | -                            | -                                        | -                             | -                                        | -                   |
| 1443614                   | -      | 0.0007               | 48                     | 7                      | XCV1287                     | 43          | -                            | -                                        | -                             | -                                        | -                   |
| 1445416                   | +      | 0.0000               | 17                     | 4                      | XCV1289                     | 51          | -                            | -                                        | -                             | -                                        | -                   |
| 1450021                   | +      | 0.0001               | 8                      | 1                      | XCV1292                     | 0           | -                            | -                                        | -                             | -                                        | -                   |
| 1451420                   | +      | 0.0001               | 14                     | 1                      | -                           | -           | -                            | -                                        | -                             | -                                        | +                   |
| 1451553                   | +      | 0.0055               | 10                     | 2                      | -                           | -           | -                            | -                                        | -                             | -                                        | +                   |
| 1454260                   | -      | 0.0125               | 3                      | 1                      | -                           | -           | -                            | -                                        | XCV1295                       | 821/15                                   | -                   |
| 1456955                   | +      | 0.0000               | 37                     | 0                      | XCV1299                     | 25          | -                            | -                                        | -                             | -                                        | -                   |
| 1457771                   | +      | 0.0000               | 12                     | 2                      | -                           | -           | XCV1299                      | 791/84                                   | -                             | -                                        | -                   |
| 1458095                   | -      | 0.0000               | 15                     | 1                      | -                           | -           | XCV1300                      | 819/11                                   | -                             | -                                        | -                   |
| 1460678                   | +      | 0.0000               | 9                      | 0                      | -                           | -           | -                            | -                                        | XCV1303                       | 554/672                                  | -                   |
| 1461842                   | -      | 0.0113               | 3                      | 1                      | XCV1304                     | 23          | -                            | -                                        | -                             | -                                        | -                   |
| 1463947                   | -      | 0.0002               | 7                      | 1                      | XCV1306                     | 112         | -                            | -                                        | -                             | -                                        | -                   |
| 1464022                   | +      | 0.0151               | 9                      | 0                      | -                           | -           | -                            | -                                        | -                             | -                                        | +                   |
| 1464279                   | +      | 0.0000               | 107                    | 6                      | XCV1307                     | 118         | -                            | -                                        | -                             | -                                        | -                   |
| 1464610                   | +      | 0.0122               | 3                      | 0                      | -                           | -           | XCV1307                      | 213/719                                  | -                             | -                                        | -                   |
| 1468435                   | +      | 0.0000               | 36                     | 10                     | XCV1311                     | 30          | -                            | -                                        | -                             | -                                        | -                   |
| 1470573                   | +      | 0.0005               | 6                      | 0                      | XCV1312                     | 22          | -                            | -                                        | -                             | -                                        | -                   |
| 1498473                   | -      | 0.0002               | 8                      | 0                      | -                           | -           | XCV1332                      | 8/3195                                   | -                             | -                                        | -                   |
| 1498586                   | +      | 0.0000               | 18                     | 3                      | XCV1333                     | 21          | -                            | -                                        | -                             | -                                        | -                   |
| 1502160                   | +      | 0.0000               | 15                     | 3                      | XCV1336                     | 21          | -                            | -                                        | -                             | -                                        | -                   |
| 1504286                   | -      | 0.0000               | 15                     | 0                      | XCV1337                     | 0           | -                            | -                                        | -                             | -                                        | -                   |
| 1504669                   | +      | 0.0019               | 5                      | 1                      | XCV1338                     | 28          | -                            | -                                        | -                             | -                                        | -                   |
| 1506240                   | +      | 0.0023               | 7                      | 2                      | XCV1339                     | 21          | -                            | -                                        | -                             | -                                        | -                   |
| 1508171                   | +      | 0.0000               | 62                     | 7                      | XCV1342                     | 45          | -                            | -                                        | -                             | -                                        | -                   |
| 1508253                   | -      | 0.0275               | 8                      | 0                      | -                           | -           | -                            | -                                        | XCV1342                       | 37/217                                   | -                   |
| 1508464                   | +      | 0.0113               | 6                      | 1                      | XCV1343                     | 23          | XCV1342                      | 248/6                                    | -                             | -                                        | -                   |
| 1509902                   | +      | 0.0000               | 34                     | 3                      | XCV1345                     | 97          | -                            | -                                        | -                             | -                                        | -                   |
| 1529221                   | +      | 0.0200               | 8                      | 0                      | -                           | -           | XCV1357                      | 388/1945                                 | -                             | -                                        | -                   |
| 1543610                   | +      | 0.0094               | 6                      | 0                      | -                           | -           | XCV1365                      | 301/493                                  | -                             | -                                        | -                   |
| 1546532                   | +      | 0.0000               | 41                     | 11                     | XCV1368                     | 22          | -                            | -                                        | -                             | -                                        | -                   |
| 1549846                   | -      | 0.0000               | 19                     | 0                      | XCV1369                     | 30          | -                            | -                                        | -                             | -                                        | -                   |
| 1549864                   | +      | 0.0081               | 6                      | 1                      | XCV1370                     | 189         | -                            | -                                        | XCV1369                       | 48/2126                                  | -                   |
| 1550020                   | +      | 0.0162               | 5                      | 1                      | XCV1370                     | 33          | -                            | -                                        | -                             | -                                        | -                   |
| 1553394                   | +      | 0.0000               | 25                     | 3                      | XCV1373                     | 50          | -                            | -                                        | -                             | -                                        | -                   |
| 1555991                   | +      | 0.0086               | 7                      | 2                      | XCV1375                     | 180         | XCV1374                      | 651/146                                  | -                             | -                                        | -                   |
| 1567734                   | +      | 0.0048               | 3                      | 0                      | XCV1387                     | 38          | XCV1386                      | 1047/35                                  | -                             | -                                        | -                   |
| 1573503                   | -      | 0.0021               | 3                      | 0                      | -                           | -           | XCV1393                      | 482/2016                                 | -                             | -                                        | -                   |
| 1580759                   | -      | 0.0050               | 6                      | 1                      | XCV1399                     | 248         | XCV1400                      | 322/16                                   | -                             | -                                        | -                   |
| 1581048                   | -      | 0.0441               | 5                      | 1                      | -                           | -           | XCV1400                      | 33/305                                   | -                             | -                                        | -                   |
| 1582399                   | -      | 0.0000               | 14                     | 2                      | XCV1401                     | 20          | -                            | -                                        | -                             | -                                        | -                   |
| 1582406                   | +      | 0.0046               | 5                      | 1                      | XCV1402                     | 128         | -                            | -                                        | XCV1401                       | 27/1199                                  | -                   |
| 1589016                   | +      | 0.0002               | 9                      | 1                      | XCV1406                     | 69          | -                            | -                                        | -                             | -                                        | -                   |
| 1589822                   | +      | 0.0000               | 10                     | 1                      | XCV1408                     | 22          | -                            | -                                        | -                             | -                                        | -                   |
| 1590522                   | -      | 0.0020               | 3                      | 0                      | -                           | -           | XCV1409                      | 338/225                                  | -                             | -                                        | -                   |
| 1591652                   | -      | 0.0054               | 5                      | 1                      | XCV1410                     | 154         | -                            | -                                        | -                             | -                                        | -                   |
| 1593751                   | -      | 0.0000               | 7                      | 0                      | XCV1413                     | 68          | -                            | -                                        | -                             | -                                        | -                   |
| 1595169                   | +      | 0.0009               | 7                      | 0                      | XCV1415                     | 21          | -                            | -                                        | XCV1414                       | 76/1140                                  | -                   |

<sup>a</sup>, TSS position on the *Xcv* chromosome and the plasmid (pXCV183; marked with #), respectively. <sup>b</sup>, p-value indicates the significance of the annotated TSS (see METHODS). <sup>c</sup>, number of read starts at TSS position. <sup>d</sup>, TSS classification and the corresponding CDS. <sup>e</sup>, distance of the TSS to annotated start and stop codon of the corresponding CDS. <sup>f</sup>, a TSS is classified as orphan (+) if it is neither classified as primary, internal nor antisense TSS.

| TSS position <sup>a</sup> | Strand | p-value <sup>b</sup> | Library 2 <sup>c</sup> | Library 1 <sup>c</sup> | Primary <sup>d</sup> to CDS | 5' UTR (bp) | Internal <sup>d</sup> to CDS | Distance to start/stop <sup>e</sup> (bp) | Antisense <sup>d</sup> to CDS | Distance to start/stop <sup>e</sup> (bp) | Orphan <sup>f</sup> |
|---------------------------|--------|----------------------|------------------------|------------------------|-----------------------------|-------------|------------------------------|------------------------------------------|-------------------------------|------------------------------------------|---------------------|
| 1601206                   | +      | 0.0360               | 5                      | 2                      | XCV1423<br>XCV1424          | 0<br>264    | -                            | -                                        | -                             | -                                        | -                   |
| 1601450                   | +      | 0.0022               | 5                      | 0                      | XCV1424                     | 20          | -                            | -                                        | -                             | -                                        | -                   |
| 1609450                   | +      | 0.0000               | 17                     | 0                      | -                           | -           | -                            | -                                        | XCV1430                       | 151/391                                  | -                   |
| 1614026                   | -      | 0.0069               | 3                      | 0                      | -                           | -           | XCV1434                      | 128/1002                                 | -                             | -                                        | -                   |
| 1618771                   | -      | 0.0010               | 5                      | 1                      | XCV1440                     | 52          | -                            | -                                        | -                             | -                                        | -                   |
| 1618915                   | +      | 0.0038               | 4                      | 0                      | -                           | -           | -                            | -                                        | XCV1441                       | 2116/35                                  | -                   |
| 1624149                   | -      | 0.0192               | 5                      | 0                      | -                           | -           | -                            | -                                        | XCV1446                       | 1/678                                    | -                   |
| 1629856                   | -      | 0.0009               | 5                      | 0                      | XCV1450                     | 22          | -                            | -                                        | -                             | -                                        | -                   |
| 1631636                   | -      | 0.0147               | 3                      | 0                      | XCV1452                     | 8           | -                            | -                                        | -                             | -                                        | -                   |
| 1631992                   | +      | 0.0137               | 3                      | 1                      | XCV1453                     | 10          | -                            | -                                        | -                             | -                                        | -                   |
| 1639397                   | +      | 0.0060               | 4                      | 1                      | XCV1459                     | 28          | -                            | -                                        | XCV1458                       | 46/645                                   | -                   |
| 1641414                   | -      | 0.0122               | 3                      | 0                      | XCV1461                     | 44          | -                            | -                                        | -                             | -                                        | -                   |
| 1642409                   | -      | 0.0000               | 20                     | 5                      | XCV1462                     | 22          | -                            | -                                        | -                             | -                                        | -                   |
| 1644256                   | -      | 0.0088               | 3                      | 0                      | -                           | -           | XCV1463                      | 1905/1682                                | -                             | -                                        | -                   |
| 1648431                   | -      | 0.0007               | 5                      | 0                      | -                           | -           | XCV1465                      | 8/1308                                   | -                             | -                                        | -                   |
| 1653692                   | -      | 0.0000               | 18                     | 6                      | XCV1470                     | 209         | XCV1471                      | 1221/122                                 | -                             | -                                        | -                   |
| 1658315                   | -      | 0.0000               | 49                     | 5                      | XCV1475                     | 25          | -                            | -                                        | -                             | -                                        | -                   |
| 1659232                   | -      | 0.0166               | 3                      | 1                      | XCV1476                     | 32          | -                            | -                                        | -                             | -                                        | -                   |
| 1659403                   | +      | 0.0034               | 4                      | 0                      | -                           | -           | -                            | -                                        | XCV1477                       | 1427/93                                  | -                   |
| 1660847                   | -      | 0.0038               | 6                      | 2                      | XCV1477                     | 17          | -                            | -                                        | -                             | -                                        | -                   |
| 1663194                   | -      | 0.0000               | 15                     | 4                      | XCV1479                     | 242         | -                            | -                                        | -                             | -                                        | -                   |
| 1669473                   | +      | 0.0000               | 12                     | 1                      | XCV1485                     | 0           | -                            | -                                        | -                             | -                                        | -                   |
| 1676072                   | +      | 0.0012               | 7                      | 0                      | XCV1490                     | 220         | -                            | -                                        | -                             | -                                        | -                   |
| 1684643                   | +      | 0.0000               | 70                     | 11                     | XCV1495                     | 21          | -                            | -                                        | -                             | -                                        | -                   |
| 1690056                   | +      | 0.0113               | 4                      | 0                      | XCV1499                     | 63          | -                            | -                                        | XCV1498                       | 51/899                                   | -                   |
| 1690128                   | +      | 0.0290               | 3                      | 0                      | -                           | -           | XCV1499                      | 9/437                                    | -                             | -                                        | -                   |
| 1700939                   | -      | 0.0019               | 3                      | 0                      | XCV1506                     | 26          | -                            | -                                        | XCV1507                       | 39/1895                                  | -                   |
| 1702829                   | +      | 0.0009               | 5                      | 0                      | XCV1508                     | 16          | XCV1507                      | 1929/5                                   | -                             | -                                        | -                   |
| 1704019                   | -      | 0.0037               | 4                      | 0                      | XCV1509                     | 69          | -                            | -                                        | -                             | -                                        | -                   |
| 1704140                   | +      | 0.0005               | 8                      | 1                      | XCV1510                     | 38          | -                            | -                                        | -                             | -                                        | -                   |
| 1708364                   | -      | 0.0001               | 18                     | 7                      | XCV1513                     | 70          | -                            | -                                        | -                             | -                                        | -                   |
| 1710153                   | -      | 0.0031               | 3                      | 0                      | XCV1515                     | 25          | -                            | -                                        | -                             | -                                        | -                   |
| 1712207                   | -      | 0.0034               | 4                      | 0                      | XCV1516                     | 0           | -                            | -                                        | -                             | -                                        | -                   |
| 1712476                   | +      | 0.0277               | 4                      | 2                      | XCV1517                     | 30          | -                            | -                                        | -                             | -                                        | -                   |
| 1719682                   | +      | 0.0000               | 20                     | 2                      | XCV1525                     | 0           | -                            | -                                        | XCV1524                       | 75/500                                   | -                   |
| 1721663                   | +      | 0.0000               | 20                     | 5                      | XCV1528                     | 34          | -                            | -                                        | -                             | -                                        | -                   |
| 1724343                   | -      | 0.0193               | 3                      | 0                      | -                           | -           | -                            | -                                        | XCV1530                       | 504/1025                                 | -                   |
| 1726530                   | +      | 0.0027               | 3                      | 0                      | XCV1532                     | 29          | -                            | -                                        | -                             | -                                        | -                   |
| 1733457                   | +      | 0.0000               | 12                     | 2                      | XCV1537                     | 39          | -                            | -                                        | -                             | -                                        | -                   |
| 1736086                   | +      | 0.0264               | 3                      | 0                      | XCV1539                     | 131         | -                            | -                                        | XCV1538                       | 1/1030                                   | -                   |
| 1745530                   | +      | 0.0024               | 3                      | 0                      | -                           | -           | XCV1545                      | 189/41                                   | -                             | -                                        | -                   |
| 1750856                   | +      | 0.0000               | 21                     | 2                      | -                           | -           | XCV1551                      | 817/13                                   | XCV1552                       | 537/46                                   | -                   |
| 1753470                   | -      | 0.0000               | 31                     | 1                      | -                           | -           | -                            | -                                        | -                             | -                                        | +                   |
| 1756674                   | +      | 0.0000               | 18                     | 6                      | XCV1557                     | 73          | -                            | -                                        | XCV1556                       | 12/488                                   | -                   |
| 1756686                   | -      | 0.0000               | 27                     | 2                      | XCV1556                     | 0           | -                            | -                                        | XCV1557                       | 61/489                                   | -                   |
| 1758176                   | -      | 0.0000               | 17                     | 1                      | XCV1559                     | 24          | -                            | -                                        | XCV1560                       | 81/488                                   | -                   |
| 1758200                   | +      | 0.0493               | 3                      | 0                      | XCV1560                     | 57          | -                            | -                                        | XCV1559                       | 48/440                                   | -                   |
| 1762031                   | +      | 0.0060               | 8                      | 4                      | XCV1563                     | 36          | -                            | -                                        | -                             | -                                        | -                   |
| 1762679                   | +      | 0.0002               | 7                      | 1                      | XCV1564                     | 48          | -                            | -                                        | -                             | -                                        | -                   |
| 1768866                   | -      | 0.0152               | 5                      | 0                      | -                           | -           | XCV1568                      | 81/197                                   | -                             | -                                        | -                   |
| 1778677                   | -      | 0.0061               | 3                      | 0                      | -                           | -           | XCV1576                      | 903/536                                  | -                             | -                                        | -                   |
| 1779063                   | -      | 0.0195               | 3                      | 0                      | -                           | -           | XCV1576                      | 517/922                                  | -                             | -                                        | -                   |
| 1783856                   | -      | 0.0000               | 18                     | 5                      | -                           | -           | XCV1578                      | 65/2904                                  | -                             | -                                        | -                   |

<sup>a</sup>, TSS position on the *Xcv* chromosome and the plasmid (pXCV183; marked with #), respectively. <sup>b</sup>, p-value indicates the significance of the annotated TSS (see METHODS). <sup>c</sup>, number of read starts at TSS position. <sup>d</sup>, TSS classification and the corresponding CDS. <sup>e</sup>, distance of the TSS to annotated start and stop codon of the corresponding CDS. <sup>f</sup>, a TSS is classified as orphan (+) if it is neither classified as primary, internal nor antisense TSS.

| TSS position <sup>a</sup> | Strand | p-value <sup>b</sup> | Library 2 <sup>c</sup> | Library 1 <sup>c</sup> | Primary <sup>d</sup> to CDS | 5' UTR (bp) | Internal <sup>d</sup> to CDS | Distance to start/stop <sup>e</sup> (bp) | Antisense <sup>d</sup> to CDS | Distance to start/stop <sup>e</sup> (bp) | Orphan <sup>f</sup> |
|---------------------------|--------|----------------------|------------------------|------------------------|-----------------------------|-------------|------------------------------|------------------------------------------|-------------------------------|------------------------------------------|---------------------|
| 1783909                   | +      | 0.0004               | 5                      | 0                      | -                           | -           | -                            | -                                        | XCV1578<br>XCV1579            | 12/2957<br>978/52                        | -                   |
| 1788756                   | -      | 0.0008               | 4                      | 0                      | XCV1582                     | 28          | -                            | -                                        | XCV1583                       | 7/1117                                   | -                   |
| 1791356                   | -      | 0.0000               | 13                     | 0                      | XCV1584                     | 147         | -                            | -                                        | -                             | -                                        | -                   |
| 1793470                   | -      | 0.0004               | 7                      | 0                      | -                           | -           | XCV1586                      | 5/441                                    | -                             | -                                        | -                   |
| 1797706                   | -      | 0.0000               | 9                      | 0                      | XCV1591                     | 280         | -                            | -                                        | -                             | -                                        | -                   |
| 1798406                   | +      | 0.0000               | 19                     | 7                      | XCV1593                     | 47          | -                            | -                                        | -                             | -                                        | -                   |
| 1803085                   | +      | 0.0019               | 5                      | 1                      | XCV1598                     | 11          | -                            | -                                        | -                             | -                                        | -                   |
| 1814647                   | +      | 0.0433               | 9                      | 0                      | -                           | -           | XCV1606                      | 149/1542                                 | -                             | -                                        | -                   |
| 1816736                   | +      | 0.0000               | 17                     | 0                      | XCV1607                     | 1           | -                            | -                                        | -                             | -                                        | -                   |
| 1819516                   | +      | 0.0183               | 3                      | 0                      | XCV1608                     | 23          | -                            | -                                        | -                             | -                                        | -                   |
| 1820299                   | +      | 0.0000               | 12                     | 0                      | XCV1609                     | 22          | -                            | -                                        | -                             | -                                        | -                   |
| 1821313                   | +      | 0.0001               | 9                      | 1                      | -                           | -           | XCV1610                      | 140/3054                                 | -                             | -                                        | -                   |
| 1825238                   | -      | 0.0001               | 8                      | 1                      | -                           | -           | XCV1611                      | 6/632                                    | -                             | -                                        | -                   |
| 1830728                   | -      | 0.0186               | 3                      | 0                      | -                           | -           | XCV1617                      | 37/1051                                  | -                             | -                                        | -                   |
| 1833891                   | +      | 0.0000               | 87                     | 4                      | -                           | -           | XCV1620                      | 63/338                                   | -                             | -                                        | -                   |
| 1838797                   | +      | 0.0000               | 40                     | 12                     | XCV1626                     | 51          | -                            | -                                        | -                             | -                                        | -                   |
| 1843191                   | +      | 0.0014               | 5                      | 0                      | XCV1631                     | 0           | -                            | -                                        | XCV1630                       | 24/596                                   | -                   |
| 1859472                   | -      | 0.0028               | 7                      | 2                      | XCV1646                     | 0           | -                            | -                                        | -                             | -                                        | -                   |
| 1859602                   | +      | 0.0008               | 6                      | 1                      | XCV1647                     | 26          | -                            | -                                        | -                             | -                                        | -                   |
| 1864572                   | +      | 0.0002               | 7                      | 0                      | -                           | -           | XCV1654                      | 8/699                                    | -                             | -                                        | -                   |
| 1868556                   | -      | 0.0000               | 40                     | 4                      | XCV1659                     | 30          | -                            | -                                        | -                             | -                                        | -                   |
| 1868712                   | +      | 0.0002               | 7                      | 1                      | XCV1660                     | 19          | -                            | -                                        | -                             | -                                        | -                   |
| 1874518                   | +      | 0.0001               | 15                     | 4                      | XCV1665                     | 38          | -                            | -                                        | -                             | -                                        | -                   |
| 1875752                   | -      | 0.0005               | 6                      | 0                      | -                           | -           | -                            | -                                        | XCV1666                       | 458/78                                   | -                   |
| 1880820                   | -      | 0.0193               | 3                      | 0                      | -                           | -           | -                            | -                                        | XCV1669<br>XCV1670            | 1001/42<br>70/753                        | -                   |
| 1882951                   | +      | 0.0000               | 12                     | 3                      | XCV1672                     | 98          | -                            | -                                        | -                             | -                                        | -                   |
| 1895289                   | -      | 0.0047               | 5                      | 1                      | XCV1679                     | 25          | -                            | -                                        | XCV1680                       | 36/1403                                  | -                   |
| 1895299                   | +      | 0.0072               | 4                      | 0                      | XCV1680                     | 26          | -                            | -                                        | XCV1679                       | 35/1237                                  | -                   |
| 1900120                   | -      | 0.0065               | 5                      | 1                      | XCV1684                     | 90          | -                            | -                                        | -                             | -                                        | -                   |
| 1903361                   | +      | 0.0000               | 26                     | 5                      | XCV1689                     | 21          | -                            | -                                        | -                             | -                                        | -                   |
| 1908861                   | -      | 0.0008               | 5                      | 0                      | XCV1693                     | 19          | -                            | -                                        | XCV1694                       | 93/1370                                  | -                   |
| 1908930                   | +      | 0.0000               | 31                     | 1                      | XCV1694                     | 24          | -                            | -                                        | XCV1693                       | 88/756                                   | -                   |
| 1911229                   | +      | 0.0005               | 7                      | 1                      | XCV1696                     | 12          | -                            | -                                        | XCV1695                       | 89/670                                   | -                   |
| 1912983                   | +      | 0.0148               | 3                      | 1                      | -                           | -           | XCV1697                      | 180/1178                                 | -                             | -                                        | -                   |
| 1914145                   | +      | 0.0003               | 19                     | 9                      | XCV1698                     | 113         | XCV1697                      | 1342/16                                  | -                             | -                                        | -                   |
| 1914895                   | -      | 0.0000               | 170                    | 21                     | -                           | -           | -                            | -                                        | XCV1699                       | 425/432                                  | -                   |
| 1915239                   | +      | 0.0039               | 5                      | 1                      | -                           | -           | XCV1699                      | 769/88                                   | -                             | -                                        | -                   |
| 1921894                   | -      | 0.0000               | 44                     | 2                      | -                           | -           | XCV1704                      | 297/491                                  | -                             | -                                        | -                   |
| 1925949                   | +      | 0.0000               | 11                     | 1                      | XCV1707                     | 18          | -                            | -                                        | -                             | -                                        | -                   |
| 1938634                   | -      | 0.0204               | 3                      | 1                      | XCV1719                     | 95          | -                            | -                                        | -                             | -                                        | -                   |
| 1961959                   | +      | 0.0022               | 3                      | 0                      | XCV1741                     | 21          | -                            | -                                        | -                             | -                                        | -                   |
| 1964107                   | -      | 0.0151               | 3                      | 0                      | -                           | -           | XCV1743                      | 400/937                                  | -                             | -                                        | -                   |
| 1964739                   | +      | 0.0021               | 3                      | 0                      | XCV1744                     | 41          | -                            | -                                        | -                             | -                                        | -                   |
| 1966625                   | +      | 0.0056               | 3                      | 0                      | XCV1746                     | 28          | -                            | -                                        | -                             | -                                        | -                   |
| 1971387                   | -      | 0.0000               | 8                      | 0                      | -                           | -           | XCV1748                      | 108/1910                                 | -                             | -                                        | -                   |
| 1971505                   | +      | 0.0000               | 15                     | 1                      | -                           | -           | -                            | -                                        | XCV1748                       | 10/2028                                  | -                   |
| 1972062                   | +      | 0.0000               | 13                     | 1                      | XCV1749                     | 22          | -                            | -                                        | -                             | -                                        | -                   |
| 1974295                   | -      | 0.0437               | 7                      | 0                      | -                           | -           | -                            | -                                        | XCV1750                       | 326/501                                  | -                   |
| 1975236                   | +      | 0.0034               | 4                      | 0                      | XCV1752                     | 47          | -                            | -                                        | -                             | -                                        | -                   |
| 1976107                   | +      | 0.0055               | 5                      | 0                      | -                           | -           | XCV1752                      | 824/465                                  | -                             | -                                        | -                   |
| 1980337                   | +      | 0.0000               | 22                     | 0                      | XCV1758                     | 17          | -                            | -                                        | XCV1757                       | 83/622                                   | -                   |
| 1984126                   | -      | 0.0005               | 4                      | 0                      | XCV1763                     | 24          | -                            | -                                        | XCV1764                       | 42/671                                   | -                   |

<sup>a</sup>, TSS position on the *Xcv* chromosome and the plasmid (pXCV183; marked with #), respectively. <sup>b</sup>, p-value indicates the significance of the annotated TSS (see METHODS). <sup>c</sup>, number of read starts at TSS position. <sup>d</sup>, TSS classification and the corresponding CDS. <sup>e</sup>, distance of the TSS to annotated start and stop codon of the corresponding CDS. <sup>f</sup>, a TSS is classified as orphan (+) if it is neither classified as primary, internal nor antisense TSS.

| TSS position <sup>a</sup> | Strand | p-value <sup>b</sup> | Library 2 <sup>c</sup> | Library 1 <sup>c</sup> | Primary <sup>d</sup> to CDS | 5' UTR (bp) | Internal <sup>d</sup> to CDS | Distance to start/stop <sup>e</sup> (bp) | Antisense <sup>d</sup> to CDS | Distance to start/stop <sup>e</sup> (bp) | Orphan <sup>f</sup> |
|---------------------------|--------|----------------------|------------------------|------------------------|-----------------------------|-------------|------------------------------|------------------------------------------|-------------------------------|------------------------------------------|---------------------|
| 1984810                   | +      | 0.0051               | 8                      | 3                      | XCV1765                     | 45          | -                            | -                                        | -                             | -                                        | -                   |
| 1988882                   | +      | 0.0042               | 9                      | 2                      | XCV1769<br>XCV1768          | 299<br>9    | -                            | -                                        | -                             | -                                        | -                   |
| 1989065                   | +      | 0.0275               | 4                      | 0                      | XCV1769                     | 116         | XCV1768                      | 174/101                                  | -                             | -                                        | -                   |
| 1993650                   | +      | 0.0050               | 4                      | 1                      | XCV1772                     | 0           | -                            | -                                        | -                             | -                                        | -                   |
| 1996311                   | +      | 0.0230               | 7                      | 3                      | XCV1775                     | 74          | -                            | -                                        | -                             | -                                        | -                   |
| 1996655                   | +      | 0.0419               | 5                      | 1                      | -                           | -           | XCV1775                      | 270/2375                                 | -                             | -                                        | -                   |
| 1998924                   | +      | 0.0002               | 18                     | 1                      | XCV1776                     | 249         | XCV1775                      | 2539/106                                 | -                             | -                                        | -                   |
| 1999090                   | +      | 0.0000               | 30                     | 4                      | XCV1776                     | 83          | -                            | -                                        | -                             | -                                        | -                   |
| 2011844                   | -      | 0.0138               | 4                      | 0                      | XCV1789                     | 264         | XCV1790                      | 374/249                                  | -                             | -                                        | -                   |
| 2012054                   | -      | 0.0424               | 4                      | 0                      | -                           | -           | XCV1790                      | 164/459                                  | -                             | -                                        | -                   |
| 2014218                   | -      | 0.0000               | 15                     | 3                      | XCV1793                     | 19          | -                            | -                                        | -                             | -                                        | -                   |
| 2018225                   | +      | 0.0012               | 6                      | 1                      | XCV1798                     | 30          | -                            | -                                        | -                             | -                                        | -                   |
| 2041528                   | +      | 0.0004               | 8                      | 2                      | XCV1810                     | 30          | -                            | -                                        | -                             | -                                        | -                   |
| 2046892                   | -      | 0.0002               | 8                      | 1                      | -                           | -           | -                            | -                                        | XCV1814                       | 28/1392                                  | -                   |
| 2046910                   | +      | 0.0095               | 3                      | 0                      | XCV1814                     | 10          | -                            | -                                        | -                             | -                                        | -                   |
| 2048788                   | +      | 0.0014               | 5                      | 1                      | XCV1816                     | 24          | -                            | -                                        | -                             | -                                        | -                   |
| 2050617                   | +      | 0.0000               | 11                     | 0                      | XCV1818                     | 26          | -                            | -                                        | -                             | -                                        | -                   |
| 2056210                   | +      | 0.0105               | 3                      | 0                      | XCV1823                     | 3           | -                            | -                                        | -                             | -                                        | -                   |
| 2061162                   | +      | 0.0026               | 5                      | 1                      | -                           | -           | -                            | -                                        | XCV1825                       | 1738/259                                 | -                   |
| 2063383                   | +      | 0.0003               | 5                      | 0                      | -                           | -           | XCV1826                      | 165/809                                  | -                             | -                                        | -                   |
| 2064776                   | -      | 0.0056               | 3                      | 0                      | -                           | -           | XCV1827                      | 166/397                                  | -                             | -                                        | -                   |
| 2066165                   | -      | 0.0265               | 6                      | 3                      | XCV1828                     | 0           | -                            | -                                        | -                             | -                                        | -                   |
| 2066489                   | +      | 0.0029               | 7                      | 0                      | XCV1829                     | 0           | -                            | -                                        | -                             | -                                        | -                   |
| 2076935                   | -      | 0.0010               | 4                      | 0                      | XCV1838                     | 55          | -                            | -                                        | -                             | -                                        | -                   |
| 2077009                   | +      | 0.0344               | 6                      | 0                      | -                           | -           | -                            | -                                        | -                             | -                                        | +                   |
| 2077238                   | +      | 0.0116               | 7                      | 1                      | XCV1839                     | 103         | -                            | -                                        | -                             | -                                        | -                   |
| 2078061                   | +      | 0.0225               | 4                      | 1                      | -                           | -           | -                            | -                                        | XCV1840                       | 838/8                                    | -                   |
| 2078080                   | -      | 0.0000               | 14                     | 1                      | -                           | -           | XCV1840                      | 819/11                                   | -                             | -                                        | -                   |
| 2080165                   | +      | 0.0001               | 20                     | 9                      | XCV1843                     | 29          | -                            | -                                        | XCV1842                       | 17/930                                   | -                   |
| 2080915                   | -      | 0.0000               | 170                    | 21                     | -                           | -           | -                            | -                                        | XCV1844                       | 425/432                                  | -                   |
| 2081259                   | +      | 0.0038               | 5                      | 1                      | XCV1845                     | 156         | XCV1844                      | 769/88                                   | -                             | -                                        | -                   |
| 2081955                   | +      | 0.0103               | 3                      | 0                      | -                           | -           | XCV1845                      | 540/11                                   | XCV1846                       | 816/76                                   | -                   |
| 2088259                   | +      | 0.0013               | 5                      | 0                      | XCV1852                     | 36          | -                            | -                                        | -                             | -                                        | -                   |
| 2094165                   | +      | 0.0004               | 6                      | 0                      | XCV1859                     | 103         | -                            | -                                        | -                             | -                                        | -                   |
| 2100728                   | +      | 0.0004               | 5                      | 0                      | -                           | -           | XCV1861                      | 3048/8078                                | -                             | -                                        | -                   |
| 2108278                   | -      | 0.0259               | 3                      | 0                      | -                           | -           | -                            | -                                        | XCV1861                       | 10598/528                                | -                   |
| 2109973                   | +      | 0.0000               | 20                     | 2                      | XCV1864                     | 151         | XCV1863                      | 817/13                                   | -                             | -                                        | -                   |
| 2111307                   | +      | 0.0000               | 17                     | 4                      | XCV1866                     | 226         | -                            | -                                        | -                             | -                                        | -                   |
| 2118507                   | -      | 0.0193               | 3                      | 0                      | -                           | -           | XCV1871                      | 90/668                                   | -                             | -                                        | -                   |
| 2118674                   | +      | 0.0000               | 9                      | 0                      | XCV1872                     | 31          | -                            | -                                        | XCV1871                       | 77/835                                   | -                   |
| 2133276                   | -      | 0.0001               | 11                     | 2                      | XCV1886                     | 0           | -                            | -                                        | -                             | -                                        | -                   |
| 2134171                   | -      | 0.0080               | 5                      | 0                      | -                           | -           | XCV1887                      | 625/802                                  | -                             | -                                        | -                   |
| 2136428                   | -      | 0.0036               | 5                      | 0                      | XCV1888                     | 83          | -                            | -                                        | XCV1889                       | 100/648                                  | -                   |
| 2136615                   | -      | 0.0356               | 4                      | 0                      | XCV1888                     | 270         | -                            | -                                        | XCV1889                       | 87/461                                   | -                   |
| 2138655                   | +      | 0.0022               | 5                      | 0                      | -                           | -           | XCV1891                      | 50/1437                                  | -                             | -                                        | -                   |
| 2140105                   | +      | 0.0393               | 3                      | 1                      | XCV1892                     | 25          | -                            | -                                        | -                             | -                                        | -                   |
| 2149915                   | +      | 0.0034               | 11                     | 0                      | -                           | -           | XCV1904                      | 174/1199                                 | -                             | -                                        | -                   |
| 2153351                   | +      | 0.0000               | 33                     | 2                      | XCV1907                     | 111         | -                            | -                                        | -                             | -                                        | -                   |
| 2163985                   | +      | 0.0000               | 45                     | 9                      | XCV1915                     | 22          | -                            | -                                        | -                             | -                                        | -                   |
| 2171527                   | +      | 0.0078               | 4                      | 1                      | -                           | -           | -                            | -                                        | XCV1920                       | 303/563                                  | -                   |
| 2173745                   | -      | 0.0019               | 6                      | 0                      | XCV1921                     | 56          | -                            | -                                        | XCV1922                       | 21/488                                   | -                   |
| 2173764                   | +      | 0.0177               | 3                      | 1                      | -                           | -           | XCV1922                      | 40/469                                   | XCV1921                       | 75/1754                                  | -                   |
| 2177450                   | -      | 0.0000               | 7                      | 0                      | XCV1924                     | 34          | -                            | -                                        | -                             | -                                        | -                   |

<sup>a</sup>, TSS position on the Xcv chromosome and the plasmid (pXCV183; marked with #), respectively. <sup>b</sup>, p-value indicates the significance of the annotated TSS (see METHODS). <sup>c</sup>, number of read starts at TSS position. <sup>d</sup>, TSS classification and the corresponding CDS. <sup>e</sup>, distance of the TSS to annotated start and stop codon of the corresponding CDS. <sup>f</sup>, a TSS is classified as orphan (+) if it is neither classified as primary, internal nor antisense TSS.

| TSS position <sup>a</sup> | Strand | p-value <sup>b</sup> | Library 2 <sup>c</sup> | Library 1 <sup>c</sup> | Primary <sup>d</sup> to CDS | 5' UTR (bp) | Internal <sup>d</sup> to CDS | Distance to start/stop <sup>e</sup> (bp) | Antisense <sup>d</sup> to CDS | Distance to start/stop <sup>e</sup> (bp) | Orphan <sup>f</sup> |
|---------------------------|--------|----------------------|------------------------|------------------------|-----------------------------|-------------|------------------------------|------------------------------------------|-------------------------------|------------------------------------------|---------------------|
| 2177544                   | +      | 0.0048               | 6                      | 1                      | XCV1926<br>XCV1925          | 265<br>20   | -                            | -                                        | -                             | -                                        | -                   |
| 2181033                   | +      | 0.0009               | 4                      | 0                      | XCV1928                     | 17          | -                            | -                                        | -                             | -                                        | -                   |
| 2185929                   | +      | 0.0206               | 3                      | 0                      | -                           | -           | -                            | -                                        | XCV1931                       | 407/186                                  | -                   |
| 2190346                   | -      | 0.0000               | 10                     | 0                      | XCV1934                     | 56          | -                            | -                                        | -                             | -                                        | -                   |
| 2191418                   | +      | 0.0014               | 4                      | 0                      | -                           | -           | -                            | -                                        | XCV1936                       | 728/54                                   | -                   |
| 2192469                   | +      | 0.0054               | 3                      | 0                      | -                           | -           | -                            | -                                        | XCV1937                       | 282/20                                   | -                   |
| 2201842                   | +      | 0.0206               | 3                      | 0                      | -                           | -           | -                            | -                                        | XCV1941                       | 2237/234                                 | -                   |
| 2221729                   | -      | 0.0018               | 3                      | 0                      | -                           | -           | XCV1952                      | 1758/416                                 | -                             | -                                        | -                   |
| 2226060                   | +      | 0.0031               | 3                      | 0                      | -                           | -           | -                            | -                                        | XCV1954                       | 1097/1173                                | -                   |
| 2236742                   | -      | 0.0198               | 5                      | 0                      | XCV1962                     | 157         | -                            | -                                        | -                             | -                                        | -                   |
| 2239894                   | +      | 0.0087               | 3                      | 0                      | -                           | -           | XCV1963                      | 2441/657                                 | -                             | -                                        | -                   |
| 2245024                   | +      | 0.0000               | 19                     | 2                      | -                           | -           | XCV1969                      | 817/13                                   | -                             | -                                        | -                   |
| 2246333                   | +      | 0.0376               | 3                      | 1                      | XCV1972                     | 25          | -                            | -                                        | -                             | -                                        | -                   |
| 2247573                   | -      | 0.0193               | 3                      | 0                      | -                           | -           | -                            | -                                        | XCV1973                       | 582/893                                  | -                   |
| 2283523                   | -      | 0.0087               | 3                      | 0                      | XCV2000                     | 53          | -                            | -                                        | -                             | -                                        | -                   |
| 2298800                   | -      | 0.0002               | 6                      | 0                      | XCV2016                     | 37          | -                            | -                                        | -                             | -                                        | -                   |
| 2299637                   | -      | 0.0000               | 29                     | 3                      | -                           | -           | XCV2017                      | 8/654                                    | -                             | -                                        | -                   |
| 2303997                   | -      | 0.0000               | 15                     | 1                      | XCV2022                     | 88          | -                            | -                                        | -                             | -                                        | -                   |
| 2316851                   | -      | 0.0000               | 7                      | 0                      | XCV2034                     | 0           | -                            | -                                        | -                             | -                                        | -                   |
| 2317891                   | +      | 0.0138               | 4                      | 1                      | XCV2036                     | 22          | -                            | -                                        | -                             | -                                        | -                   |
| 2319528                   | +      | 0.0009               | 3                      | 0                      | -                           | -           | XCV2038                      | 789/434                                  | -                             | -                                        | -                   |
| 2331979                   | +      | 0.0000               | 28                     | 2                      | -                           | -           | XCV2048                      | 60/323                                   | -                             | -                                        | -                   |
| 2332427                   | +      | 0.0011               | 9                      | 3                      | XCV2049                     | 21          | -                            | -                                        | -                             | -                                        | -                   |
| 2332843                   | -      | 0.0400               | 4                      | 0                      | -                           | -           | -                            | -                                        | XCV2049                       | 395/1884                                 | -                   |
| 2332879                   | +      | 0.0100               | 5                      | 0                      | -                           | -           | XCV2049                      | 431/1848                                 | -                             | -                                        | -                   |
| 2335263                   | -      | 0.0000               | 35                     | 5                      | XCV2051                     | 40          | -                            | -                                        | -                             | -                                        | -                   |
| 2339189                   | -      | 0.0139               | 3                      | 1                      | -                           | -           | XCV2055                      | 457/508                                  | -                             | -                                        | -                   |
| 2339660                   | +      | 0.0000               | 10                     | 1                      | XCV2056                     | 270         | -                            | -                                        | XCV2055                       | 14/979                                   | -                   |
| 2345698                   | +      | 0.0167               | 5                      | 2                      | -                           | -           | -                            | -                                        | XCV2059                       | 3686/477                                 | -                   |
| 2349615                   | +      | 0.0006               | 5                      | 0                      | XCV2060                     | 0           | -                            | -                                        | -                             | -                                        | -                   |
| 2350997                   | +      | 0.0135               | 5                      | 2                      | XCV2061                     | 171         | -                            | -                                        | -                             | -                                        | -                   |
| 2356401                   | +      | 0.0000               | 27                     | 1                      | XCV2066                     | 90          | -                            | -                                        | -                             | -                                        | -                   |
| 2358828                   | +      | 0.0000               | 30                     | 1                      | XCV2069                     | 108         | XCV2068                      | 677/108                                  | -                             | -                                        | -                   |
| 2359054                   | +      | 0.0064               | 4                      | 0                      | -                           | -           | XCV2069                      | 118/739                                  | -                             | -                                        | -                   |
| 2359959                   | +      | 0.0145               | 11                     | 6                      | -                           | -           | XCV2070                      | 92/543                                   | -                             | -                                        | -                   |
| 2363433                   | +      | 0.0023               | 8                      | 0                      | XCV2073                     | 0           | -                            | -                                        | -                             | -                                        | -                   |
| 2363454                   | +      | 0.0023               | 8                      | 0                      | -                           | -           | XCV2073                      | 21/1196                                  | -                             | -                                        | -                   |
| 2368751                   | +      | 0.0309               | 4                      | 0                      | -                           | -           | XCV2075                      | 2367/293                                 | -                             | -                                        | -                   |
| 2373126                   | -      | 0.0028               | 4                      | 0                      | XCV2080                     | 22          | -                            | -                                        | -                             | -                                        | -                   |
| 2374746                   | +      | 0.0005               | 6                      | 0                      | XCV2083                     | 29          | -                            | -                                        | -                             | -                                        | -                   |
| 2382135                   | +      | 0.0134               | 3                      | 0                      | XCV2090                     | 23          | -                            | -                                        | XCV2089                       | 58/1032                                  | -                   |
| 2384696                   | -      | 0.0077               | 4                      | 0                      | -                           | -           | -                            | -                                        | XCV2092                       | 15/1220                                  | -                   |
| 2393149                   | +      | 0.0000               | 29                     | 5                      | XCV2097                     | 35          | -                            | -                                        | -                             | -                                        | -                   |
| 2395930                   | +      | 0.0076               | 4                      | 1                      | XCV2101                     | 25          | -                            | -                                        | -                             | -                                        | -                   |
| 2396500                   | +      | 0.0018               | 5                      | 0                      | -                           | -           | XCV2101                      | 545/150                                  | -                             | -                                        | -                   |
| 2398280                   | -      | 0.0085               | 3                      | 0                      | -                           | -           | XCV2102                      | 315/1493                                 | -                             | -                                        | -                   |
| 2399163                   | +      | 0.0000               | 17                     | 2                      | XCV2103                     | 185         | -                            | -                                        | -                             | -                                        | -                   |
| 2400264                   | -      | 0.0193               | 3                      | 0                      | -                           | -           | -                            | -                                        | XCV2103                       | 916/9274                                 | -                   |
| 2411526                   | -      | 0.0190               | 3                      | 0                      | XCV2105                     | 0           | -                            | -                                        | -                             | -                                        | -                   |
| 2414657                   | -      | 0.0000               | 19                     | 2                      | -                           | -           | XCV2107                      | 1507/1582                                | -                             | -                                        | -                   |
| 2476734                   | -      | 0.0043               | 4                      | 0                      | -                           | -           | -                            | -                                        | XCV2155                       | 1024/1990                                | -                   |
| 2480236                   | -      | 0.0000               | 183                    | 10                     | XCV2156                     | 22          | -                            | -                                        | -                             | -                                        | -                   |
| 2480585                   | -      | 0.0122               | 5                      | 1                      | -                           | -           | XCV2157                      | 769/88                                   | -                             | -                                        | -                   |

<sup>a</sup>, TSS position on the *Xcv* chromosome and the plasmid (pXCV183; marked with #), respectively. <sup>b</sup>, p-value indicates the significance of the annotated TSS (see METHODS). <sup>c</sup>, number of read starts at TSS position. <sup>d</sup>, TSS classification and the corresponding CDS. <sup>e</sup>, distance of the TSS to annotated start and stop codon of the corresponding CDS. <sup>f</sup>, a TSS is classified as orphan (+) if it is neither classified as primary, internal nor antisense TSS.

| TSS position <sup>a</sup> | Strand | p-value <sup>b</sup> | Library 2 <sup>c</sup> | Library 1 <sup>c</sup> | Primary <sup>d</sup> to CDS | 5' UTR (bp) | Internal <sup>d</sup> to CDS | Distance to start/stop <sup>e</sup> (bp) | Antisense <sup>d</sup> to CDS | Distance to start/stop <sup>e</sup> (bp) | Orphan <sup>f</sup> |
|---------------------------|--------|----------------------|------------------------|------------------------|-----------------------------|-------------|------------------------------|------------------------------------------|-------------------------------|------------------------------------------|---------------------|
| 2480929                   | +      | 0.0000               | 162                    | 23                     | -                           | -           | -                            | -                                        | XCV2157                       | 425/432                                  | -                   |
| 2481679                   | -      | 0.0003               | 19                     | 10                     | XCV2158                     | 29          | -                            | -                                        | XCV2159                       | 48/686                                   | -                   |
| 2483366                   | +      | 0.0000               | 12                     | 0                      | -                           | -           | XCV2161                      | 708/938                                  | -                             | -                                        | -                   |
| 2484379                   | -      | 0.0000               | 210                    | 29                     | -                           | -           | -                            | -                                        | XCV2161<br>XCV2162            | 1721/75<br>5/222                         | -                   |
| 2485206                   | -      | 0.0008               | 5                      | 0                      | XCV2163                     | 45          | -                            | -                                        | -                             | -                                        | -                   |
| 2485799                   | +      | 0.0003               | 6                      | 0                      | -                           | -           | XCV2165                      | 73/2704                                  | -                             | -                                        | -                   |
| 2490307                   | -      | 0.0101               | 3                      | 0                      | -                           | -           | -                            | -                                        | XCV2166                       | 1804/247                                 | -                   |
| 2495693                   | -      | 0.0096               | 4                      | 0                      | -                           | -           | -                            | -                                        | -                             | -                                        | +                   |
| 2499035                   | -      | 0.0056               | 8                      | 2                      | XCV2173                     | 21          | -                            | -                                        | XCV2174                       | 76/978                                   | -                   |
| 2511922                   | -      | 0.0000               | 15                     | 0                      | XCV2183                     | 98          | -                            | -                                        | XCV2184                       | 18/938                                   | -                   |
| 2523234                   | +      | 0.0469               | 7                      | 0                      | -                           | -           | XCV2193                      | 308/1317                                 | -                             | -                                        | -                   |
| 2529317                   | +      | 0.0002               | 6                      | 0                      | XCV2200                     | 43          | -                            | -                                        | -                             | -                                        | -                   |
| 2531282                   | -      | 0.0031               | 5                      | 1                      | XCV2201                     | 124         | XCV2202                      | 2254/121                                 | -                             | -                                        | -                   |
| 2532845                   | -      | 0.0013               | 7                      | 2                      | -                           | -           | XCV2202                      | 691/1684                                 | -                             | -                                        | -                   |
| 2533596                   | -      | 0.0000               | 83                     | 7                      | XCV2202                     | 60          | -                            | -                                        | XCV2203                       | 83/901                                   | -                   |
| 2534689                   | +      | 0.0009               | 11                     | 4                      | XCV2204                     | 0           | -                            | -                                        | -                             | -                                        | -                   |
| 2536986                   | +      | 0.0000               | 11                     | 2                      | -                           | -           | XCV2207                      | 27/632                                   | -                             | -                                        | -                   |
| 2537657                   | +      | 0.0000               | 11                     | 0                      | XCV2208                     | 19          | -                            | -                                        | -                             | -                                        | -                   |
| 2540067                   | +      | 0.0068               | 3                      | 0                      | XCV2210<br>XCV2211          | 22<br>228   | -                            | -                                        | -                             | -                                        | -                   |
| 2542431                   | +      | 0.0000               | 15                     | 2                      | XCV2214                     | 32          | -                            | -                                        | -                             | -                                        | -                   |
| 2548437                   | -      | 0.0272               | 6                      | 0                      | XCV2215                     | 25          | -                            | -                                        | -                             | -                                        | -                   |
| 2549014                   | -      | 0.0000               | 26                     | 5                      | XCV2216                     | 19          | -                            | -                                        | -                             | -                                        | -                   |
| 2552155                   | +      | 0.0018               | 5                      | 0                      | XCV2222                     | 125         | XCV2221                      | 185/54                                   | -                             | -                                        | -                   |
| 2557002                   | -      | 0.0193               | 3                      | 0                      | -                           | -           | -                            | -                                        | XCV2230                       | 276/854                                  | -                   |
| 2570503                   | -      | 0.0055               | 3                      | 0                      | -                           | -           | XCV2237                      | 457/1099                                 | -                             | -                                        | -                   |
| 2573369                   | +      | 0.0000               | 65                     | 12                     | XCV2240<br>XCV2241          | 14<br>241   | -                            | -                                        | XCV2239                       | 26/895                                   | -                   |
| 2573375                   | -      | 0.0408               | 4                      | 2                      | XCV2239                     | 32          | -                            | -                                        | XCV2240                       | 8/175                                    | -                   |
| 2580164                   | +      | 0.0023               | 3                      | 0                      | -                           | -           | -                            | -                                        | XCV2250                       | 1090/29                                  | -                   |
| 2580190                   | -      | 0.0020               | 3                      | 0                      | -                           | -           | -                            | -                                        | -                             | -                                        | +                   |
| 2583951                   | +      | 0.0000               | 19                     | 5                      | XCV2252                     | 149         | XCV2251                      | 2402/144                                 | -                             | -                                        | -                   |
| 2589488                   | +      | 0.0004               | 7                      | 1                      | -                           | -           | XCV2258                      | 81/1415                                  | -                             | -                                        | -                   |
| 2590477                   | +      | 0.0005               | 5                      | 0                      | -                           | -           | XCV2258                      | 1070/426                                 | -                             | -                                        | -                   |
| 2595113                   | -      | 0.0028               | 5                      | 1                      | -                           | -           | XCV2262                      | 769/88                                   | XCV2261                       | 1384/68                                  | -                   |
| 2595457                   | +      | 0.0000               | 162                    | 23                     | -                           | -           | -                            | -                                        | XCV2262                       | 425/432                                  | -                   |
| 2596207                   | -      | 0.0004               | 19                     | 10                     | XCV2263                     | 23          | XCV2264                      | 759/146                                  | -                             | -                                        | -                   |
| 2608263                   | +      | 0.0000               | 52                     | 5                      | XCV2275                     | 22          | -                            | -                                        | -                             | -                                        | -                   |
| 2609179                   | -      | 0.0441               | 4                      | 3                      | -                           | -           | -                            | -                                        | XCV2275                       | 894/170                                  | -                   |
| 2610400                   | -      | 0.0000               | 108                    | 15                     | XCV2277                     | 23          | -                            | -                                        | -                             | -                                        | -                   |
| 2613410                   | +      | 0.0000               | 33                     | 2                      | XCV2280                     | 23          | -                            | -                                        | -                             | -                                        | -                   |
| 2613918                   | -      | 0.0087               | 4                      | 0                      | -                           | -           | -                            | -                                        | XCV2280                       | 485/588                                  | -                   |
| 2616298                   | -      | 0.0486               | 4                      | 4                      | -                           | -           | XCV2283                      | 1577/546                                 | -                             | -                                        | -                   |
| 2616321                   | +      | 0.0280               | 7                      | 4                      | -                           | -           | -                            | -                                        | XCV2283                       | 1554/569                                 | -                   |
| 2625423                   | +      | 0.0094               | 3                      | 0                      | -                           | -           | -                            | -                                        | XCV2290                       | 44/796                                   | -                   |
| 2629491                   | +      | 0.0001               | 20                     | 9                      | XCV2295                     | 29          | -                            | -                                        | XCV2294                       | 88/345                                   | -                   |
| 2630241                   | -      | 0.0000               | 170                    | 21                     | -                           | -           | -                            | -                                        | XCV2296                       | 425/432                                  | -                   |
| 2630585                   | +      | 0.0061               | 5                      | 1                      | XCV2297                     | 207         | XCV2296                      | 769/88                                   | -                             | -                                        | -                   |
| 2631345                   | +      | 0.0001               | 8                      | 0                      | -                           | -           | -                            | -                                        | -                             | -                                        | +                   |
| 2631738                   | +      | 0.0076               | 5                      | 1                      | XCV2298                     | 211         | -                            | -                                        | -                             | -                                        | -                   |
| 2634620                   | -      | 0.0125               | 3                      | 0                      | XCV2299                     | 37          | -                            | -                                        | XCV2300                       | 68/358                                   | -                   |
| 2642688                   | +      | 0.0005               | 12                     | 4                      | XCV2309                     | 26          | -                            | -                                        | -                             | -                                        | -                   |
| 2645525                   | +      | 0.0293               | 6                      | 0                      | -                           | -           | -                            | -                                        | XCV2311                       | 235/721                                  | -                   |

<sup>a</sup>, TSS position on the *Xcv* chromosome and the plasmid (pXCV183; marked with #), respectively. <sup>b</sup>, p-value indicates the significance of the annotated TSS (see METHODS). <sup>c</sup>, number of read starts at TSS position. <sup>d</sup>, TSS classification and the corresponding CDS. <sup>e</sup>, distance of the TSS to annotated start and stop codon of the corresponding CDS. <sup>f</sup>, a TSS is classified as orphan (+) if it is neither classified as primary, internal nor antisense TSS.



| TSS position <sup>a</sup> | Strand | p-value <sup>b</sup> | Library 2 <sup>c</sup> | Library 1 <sup>c</sup> | Primary <sup>d</sup> to CDS | 5' UTR (bp) | Internal <sup>d</sup> to CDS | Distance to start/stop <sup>e</sup> (bp) | Antisense <sup>d</sup> to CDS | Distance to start/stop <sup>e</sup> (bp) | Orphan <sup>f</sup> |
|---------------------------|--------|----------------------|------------------------|------------------------|-----------------------------|-------------|------------------------------|------------------------------------------|-------------------------------|------------------------------------------|---------------------|
| 2646914                   | +      | 0.0085               | 3                      | 0                      | XCV2314                     | 1           | -                            | -                                        | -                             | -                                        | -                   |
| 2651289                   | -      | 0.0067               | 3                      | 0                      | XCV2319                     | 31          | -                            | -                                        | -                             | -                                        | -                   |
| 2651497                   | +      | 0.0000               | 151                    | 12                     | -                           | -           | XCV2320                      | 11/780                                   | -                             | -                                        | -                   |
| 2651654                   | +      | 0.0232               | 8                      | 1                      | -                           | -           | XCV2320                      | 168/623                                  | -                             | -                                        | -                   |
| 2652046                   | -      | 0.0009               | 6                      | 1                      | -                           | -           | -                            | -                                        | XCV2320                       | 560/231                                  | -                   |
| 2656549                   | +      | 0.0112               | 8                      | 4                      | -                           | -           | -                            | -                                        | XCV2325                       | 877/35                                   | -                   |
| 2656965                   | +      | 0.0000               | 12                     | 0                      | -                           | -           | -                            | -                                        | XCV2325                       | 461/381                                  | -                   |
| 2659679                   | +      | 0.0004               | 7                      | 1                      | -                           | -           | -                            | -                                        | XCV2329                       | 559/232                                  | -                   |
| 2660227                   | -      | 0.0000               | 151                    | 14                     | -                           | -           | XCV2329                      | 11/780                                   | XCV2330                       | 10/501                                   | -                   |
| 2671874                   | +      | 0.0004               | 7                      | 1                      | -                           | -           | -                            | -                                        | XCV2340                       | 559/232                                  | -                   |
| 2672422                   | -      | 0.0000               | 151                    | 14                     | -                           | -           | XCV2340<br>XCV2341           | 11/780<br>831/50                         | -                             | -                                        | -                   |
| 2676073                   | +      | 0.0000               | 17                     | 4                      | XCV2345                     | 205         | XCV2344                      | 9/209                                    | -                             | -                                        | -                   |
| 2680420                   | +      | 0.0140               | 4                      | 1                      | -                           | -           | -                            | -                                        | XCV2350                       | 539/474                                  | -                   |
| 2680631                   | +      | 0.0092               | 3                      | 0                      | -                           | -           | -                            | -                                        | XCV2350                       | 328/685                                  | -                   |
| 2682681                   | -      | 0.0000               | 1040                   | 80                     | XCV2352                     | 34          | -                            | -                                        | XCV2353                       | 69/860                                   | -                   |
| 2682761                   | +      | 0.0000               | 151                    | 12                     | -                           | -           | XCV2353                      | 11/780                                   | -                             | -                                        | -                   |
| 2683310                   | -      | 0.0014               | 6                      | 1                      | -                           | -           | -                            | -                                        | XCV2353                       | 560/231                                  | -                   |
| 2684765                   | +      | 0.0021               | 3                      | 0                      | XCV2355                     | 119         | -                            | -                                        | -                             | -                                        | -                   |
| 2694331                   | +      | 0.0395               | 7                      | 0                      | -                           | -           | -                            | -                                        | XCV2365                       | 346/145                                  | -                   |
| 2740409                   | +      | 0.0004               | 9                      | 1                      | -                           | -           | -                            | -                                        | -                             | -                                        | +                   |
| 2740875                   | +      | 0.0037               | 7                      | 3                      | -                           | -           | -                            | -                                        | -                             | -                                        | +                   |
| 2744537                   | -      | 0.0193               | 3                      | 0                      | XCV2419                     | 9           | -                            | -                                        | XCV2420                       | 39/401                                   | -                   |
| 2744576                   | +      | 0.0318               | 7                      | 4                      | XCV2420                     | 0           | -                            | -                                        | XCV2419                       | 48/488                                   | -                   |
| 2745041                   | +      | 0.0026               | 4                      | 0                      | XCV2421                     | 0           | -                            | -                                        | -                             | -                                        | -                   |
| 2751220                   | -      | 0.0000               | 33                     | 2                      | -                           | -           | -                            | -                                        | XCV2424                       | 30/1013                                  | -                   |
| 2756332                   | +      | 0.0000               | 14                     | 3                      | XCV2429                     | 0           | -                            | -                                        | XCV2428                       | 89/442                                   | -                   |
| 2764488                   | +      | 0.0011               | 5                      | 0                      | XCV2434                     | 22          | -                            | -                                        | -                             | -                                        | -                   |
| 2767760                   | -      | 0.0000               | 8                      | 1                      | XCV2435                     | 187         | -                            | -                                        | -                             | -                                        | -                   |
| 2768957                   | +      | 0.0122               | 8                      | 1                      | -                           | -           | -                            | -                                        | -                             | -                                        | +                   |
| 2768989                   | -      | 0.0017               | 10                     | 3                      | -                           | -           | -                            | -                                        | XCV2436                       | 1026/67                                  | -                   |
| 2770178                   | -      | 0.0242               | 5                      | 0                      | XCV2437                     | 22          | -                            | -                                        | -                             | -                                        | -                   |
| 2779019                   | +      | 0.0351               | 4                      | 0                      | -                           | -           | -                            | -                                        | XCV2445                       | 298/565                                  | -                   |
| 2780755                   | +      | 0.0206               | 3                      | 0                      | -                           | -           | -                            | -                                        | XCV2448                       | 701/321                                  | -                   |
| 2788996                   | +      | 0.0193               | 3                      | 1                      | XCV2461                     | 27          | -                            | -                                        | -                             | -                                        | -                   |
| 2798003                   | +      | 0.0002               | 20                     | 9                      | XCV2477                     | 29          | -                            | -                                        | XCV2476                       | 49/789                                   | -                   |
| 2798753                   | -      | 0.0000               | 170                    | 21                     | -                           | -           | -                            | -                                        | XCV2478                       | 425/432                                  | -                   |
| 2799097                   | +      | 0.0038               | 5                      | 1                      | -                           | -           | XCV2478                      | 769/88                                   | XCV2479                       | 274/68                                   | -                   |
| 2801025                   | +      | 0.0293               | 5                      | 0                      | -                           | -           | XCV2482                      | 18/1007                                  | -                             | -                                        | -                   |
| 2803434                   | -      | 0.0110               | 4                      | 1                      | -                           | -           | XCV2484                      | 242/957                                  | -                             | -                                        | -                   |
| 2803838                   | -      | 0.0000               | 24                     | 7                      | XCV2484                     | 162         | -                            | -                                        | -                             | -                                        | -                   |
| 2805975                   | -      | 0.0102               | 3                      | 0                      | -                           | -           | XCV2486                      | 1154/300                                 | -                             | -                                        | -                   |
| 2806891                   | -      | 0.0465               | 3                      | 0                      | -                           | -           | XCV2486                      | 238/1216                                 | -                             | -                                        | -                   |
| 2807153                   | -      | 0.0000               | 12                     | 1                      | XCV2486                     | 24          | -                            | -                                        | -                             | -                                        | -                   |
| 2811009                   | -      | 0.0111               | 3                      | 1                      | XCV2489                     | 296         | XCV2490                      | 771/119                                  | -                             | -                                        | -                   |
| 2811397                   | -      | 0.0049               | 3                      | 0                      | -                           | -           | XCV2490                      | 383/507                                  | -                             | -                                        | -                   |
| 2811810                   | -      | 0.0000               | 28                     | 1                      | XCV2490                     | 30          | XCV2491                      | 1877/27                                  | -                             | -                                        | -                   |
| 2813614                   | +      | 0.0206               | 3                      | 0                      | -                           | -           | -                            | -                                        | XCV2491<br>XCV2492            | 73/1831<br>1055/90                       | -                   |
| 2817226                   | -      | 0.0044               | 9                      | 9                      | -                           | -           | XCV2496                      | 1085/597                                 | -                             | -                                        | -                   |
| 2818655                   | -      | 0.0000               | 20                     | 5                      | -                           | -           | XCV2497                      | 522/158                                  | -                             | -                                        | -                   |
| 2819280                   | +      | 0.0000               | 54                     | 6                      | XCV2498                     | 70          | -                            | -                                        | -                             | -                                        | -                   |
| 2819686                   | +      | 0.0000               | 11                     | 0                      | XCV2499                     | 31          | -                            | -                                        | -                             | -                                        | -                   |
| 2833387                   | -      | 0.0215               | 5                      | 1                      | XCV2509                     | 242         | XCV2510                      | 2840/135                                 | -                             | -                                        | -                   |

<sup>a</sup>, TSS position on the *Xcv* chromosome and the plasmid (pXCV183; marked with #), respectively. <sup>b</sup>, p-value indicates the significance of the annotated TSS (see METHODS). <sup>c</sup>, number of read starts at TSS position. <sup>d</sup>, TSS classification and the corresponding CDS. <sup>e</sup>, distance of the TSS to annotated start and stop codon of the corresponding CDS. <sup>f</sup>, a TSS is classified as orphan (+) if it is neither classified as primary, internal nor antisense TSS.

| TSS position <sup>a</sup> | Strand | p-value <sup>b</sup> | Library 2 <sup>c</sup> | Library 1 <sup>c</sup> | Primary <sup>d</sup> to CDS | 5' UTR (bp) | Internal <sup>d</sup> to CDS | Distance to start/stop <sup>e</sup> (bp) | Antisense <sup>d</sup> to CDS | Distance to start/stop <sup>e</sup> (bp) | Orphan <sup>f</sup> |
|---------------------------|--------|----------------------|------------------------|------------------------|-----------------------------|-------------|------------------------------|------------------------------------------|-------------------------------|------------------------------------------|---------------------|
| 2837417                   | -      | 0.0039               | 7                      | 2                      | XCV2511                     | 34          | -                            | -                                        | -                             | -                                        | -                   |
| 2838360                   | -      | 0.0015               | 4                      | 0                      | XCV2514                     | 31          | -                            | -                                        | -                             | -                                        | -                   |
| 2838423                   | +      | 0.0000               | 16                     | 1                      | -                           | -           | -                            | -                                        | XCV2514                       | 94/390                                   | -                   |
| 2843234                   | -      | 0.0000               | 29                     | 2                      | XCV2518                     | 24          | -                            | -                                        | -                             | -                                        | -                   |
| 2843374                   | +      | 0.0051               | 8                      | 0                      | XCV2519                     | 0           | -                            | -                                        | -                             | -                                        | -                   |
| 2853818                   | +      | 0.0003               | 8                      | 1                      | XCV2531                     | 0           | -                            | -                                        | -                             | -                                        | -                   |
| 2859395                   | +      | 0.0011               | 5                      | 1                      | -                           | -           | XCV2535                      | 11/1653                                  | -                             | -                                        | -                   |
| 2865835                   | -      | 0.0152               | 5                      | 0                      | XCV2539                     | 37          | -                            | -                                        | -                             | -                                        | -                   |
| 2874392                   | -      | 0.0011               | 4                      | 0                      | -                           | -           | XCV2546                      | 54/554                                   | -                             | -                                        | -                   |
| 2880224                   | -      | 0.0000               | 36                     | 5                      | XCV2551                     | 264         | -                            | -                                        | -                             | -                                        | -                   |
| 2880816                   | -      | 0.0000               | 17                     | 3                      | -                           | -           | XCV2552                      | 80/540                                   | -                             | -                                        | -                   |
| 2880924                   | +      | 0.0000               | 9                      | 0                      | XCV2553                     | 15          | -                            | -                                        | XCV2552                       | 28/648                                   | -                   |
| 2885613                   | -      | 0.0125               | 6                      | 1                      | -                           | -           | -                            | -                                        | XCV2557<br>XCV2558            | 622/43<br>46/336                         | -                   |
| 2894891                   | +      | 0.0000               | 45                     | 4                      | XCV2568                     | 229         | -                            | -                                        | XCV2567                       | 73/690                                   | -                   |
| 2894892                   | +      | 0.0006               | 30                     | 0                      | XCV2568                     | 228         | -                            | -                                        | XCV2567                       | 74/691                                   | -                   |
| 2897112                   | -      | 0.0028               | 3                      | 0                      | -                           | -           | -                            | -                                        | XCV2569                       | 681/332                                  | -                   |
| 2897115                   | +      | 0.0019               | 3                      | 0                      | -                           | -           | XCV2569                      | 684/329                                  | -                             | -                                        | -                   |
| 2899257                   | +      | 0.0068               | 3                      | 0                      | -                           | -           | XCV2571                      | 1189/478                                 | -                             | -                                        | -                   |
| 2901871                   | -      | 0.0041               | 5                      | 0                      | -                           | -           | XCV2574                      | 299/417                                  | -                             | -                                        | -                   |
| 2905203                   | -      | 0.0074               | 4                      | 0                      | XCV2577                     | 95          | -                            | -                                        | XCV2578                       | 8/1033                                   | -                   |
| 2910245                   | +      | 0.0043               | 4                      | 0                      | XCV2582                     | 71          | -                            | -                                        | XCV2581                       | 47/808                                   | -                   |
| 2915414                   | -      | 0.0000               | 21                     | 2                      | XCV2586                     | 0           | -                            | -                                        | -                             | -                                        | -                   |
| 2915525                   | +      | 0.0037               | 5                      | 1                      | XCV2587                     | 0           | -                            | -                                        | -                             | -                                        | -                   |
| 2917592                   | -      | 0.0001               | 6                      | 0                      | XCV2588                     | 30          | -                            | -                                        | -                             | -                                        | -                   |
| 2919213                   | -      | 0.0000               | 11                     | 1                      | -                           | -           | XCV2589                      | 117/1553                                 | XCV2590                       | 36/1154                                  | -                   |
| 2921819                   | -      | 0.0000               | 349                    | 6                      | XCV2592                     | 157         | -                            | -                                        | -                             | -                                        | -                   |
| 2924141                   | +      | 0.0383               | 3                      | 1                      | XCV2595                     | 16          | -                            | -                                        | -                             | -                                        | -                   |
| 2927298                   | +      | 0.0210               | 3                      | 0                      | XCV2597                     | 4           | -                            | -                                        | XCV2596                       | 94/969                                   | -                   |
| 2929160                   | +      | 0.0000               | 24                     | 4                      | XCV2599                     | 24          | -                            | -                                        | -                             | -                                        | -                   |
| 2931916                   | -      | 0.0004               | 5                      | 0                      | XCV2601                     | 29          | XCV2602                      | 1848/26                                  | -                             | -                                        | -                   |
| 2933879                   | -      | 0.0041               | 4                      | 0                      | XCV2602                     | 115         | -                            | -                                        | -                             | -                                        | -                   |
| 2935603                   | -      | 0.0000               | 17                     | 4                      | XCV2603                     | 0           | -                            | -                                        | -                             | -                                        | -                   |
| 2937657                   | -      | 0.0056               | 4                      | 1                      | XCV2605                     | 0           | -                            | -                                        | XCV2606                       | 25/1089                                  | -                   |
| 2941785                   | -      | 0.0000               | 30                     | 0                      | XCV2608                     | 20          | -                            | -                                        | -                             | -                                        | -                   |
| 2944333                   | +      | 0.0008               | 5                      | 0                      | XCV2611                     | 33          | -                            | -                                        | XCV2610                       | 86/2068                                  | -                   |
| 2945265                   | +      | 0.0005               | 5                      | 0                      | -                           | -           | XCV2611                      | 899/189                                  | -                             | -                                        | -                   |
| 2947490                   | +      | 0.0206               | 3                      | 0                      | -                           | -           | -                            | -                                        | XCV2612                       | 790/1825                                 | -                   |
| 2952716                   | +      | 0.0000               | 22                     | 2                      | -                           | -           | XCV2618                      | 817/13                                   | -                             | -                                        | -                   |
| 2953172                   | -      | 0.0002               | 6                      | 0                      | -                           | -           | -                            | -                                        | XCV2619                       | 75/347                                   | -                   |
| 2953268                   | +      | 0.0000               | 16                     | 2                      | XCV2620                     | 279         | XCV2619                      | 21/251                                   | -                             | -                                        | -                   |
| 2958333                   | +      | 0.0424               | 4                      | 0                      | -                           | -           | -                            | -                                        | XCV2625                       | 769/886                                  | -                   |
| 2959110                   | +      | 0.0295               | 3                      | 0                      | XCV2626                     | 290         | -                            | -                                        | XCV2625                       | 8/1663                                   | -                   |
| 2966234                   | -      | 0.0001               | 8                      | 1                      | XCV2630                     | 0           | -                            | -                                        | -                             | -                                        | -                   |
| 2967021                   | -      | 0.0000               | 29                     | 3                      | XCV2631                     | 73          | -                            | -                                        | -                             | -                                        | -                   |
| 2970083                   | -      | 0.0000               | 34                     | 8                      | XCV2634                     | 71          | -                            | -                                        | -                             | -                                        | -                   |
| 2971502                   | -      | 0.0000               | 31                     | 4                      | XCV2635                     | 0           | -                            | -                                        | -                             | -                                        | -                   |
| 2972659                   | -      | 0.0031               | 4                      | 0                      | -                           | -           | XCV2636                      | 105/962                                  | -                             | -                                        | -                   |
| 2976928                   | +      | 0.0008               | 7                      | 0                      | XCV2642                     | 28          | -                            | -                                        | -                             | -                                        | -                   |
| 3000010                   | +      | 0.0000               | 45                     | 7                      | XCV2661                     | 23          | -                            | -                                        | -                             | -                                        | -                   |
| 3005175                   | -      | 0.0036               | 5                      | 0                      | -                           | -           | XCV2665                      | 479/363                                  | -                             | -                                        | -                   |
| 3011678                   | +      | 0.0040               | 3                      | 0                      | XCV2671                     | 212         | XCV2670                      | 1236/65                                  | -                             | -                                        | -                   |
| 3024175                   | -      | 0.0047               | 6                      | 0                      | -                           | -           | XCV2674                      | 97/5035                                  | -                             | -                                        | -                   |
| 3024425                   | +      | 0.0317               | 3                      | 0                      | XCV2675                     | 0           | -                            | -                                        | -                             | -                                        | -                   |

<sup>a</sup>, TSS position on the *Xcv* chromosome and the plasmid (pXCV183; marked with #), respectively. <sup>b</sup>, p-value indicates the significance of the annotated TSS (see METHODS). <sup>c</sup>, number of read starts at TSS position. <sup>d</sup>, TSS classification and the corresponding CDS. <sup>e</sup>, distance of the TSS to annotated start and stop codon of the corresponding CDS. <sup>f</sup>, a TSS is classified as orphan (+) if it is neither classified as primary, internal nor antisense TSS.

| TSS position <sup>a</sup> | Strand | p-value <sup>b</sup> | Library 2 <sup>c</sup> | Library 1 <sup>c</sup> | Primary <sup>d</sup> to CDS | 5' UTR (bp) | Internal <sup>d</sup> to CDS | Distance to start/stop <sup>e</sup> (bp) | Antisense <sup>d</sup> to CDS | Distance to start/stop <sup>e</sup> (bp) | Orphan <sup>f</sup> |
|---------------------------|--------|----------------------|------------------------|------------------------|-----------------------------|-------------|------------------------------|------------------------------------------|-------------------------------|------------------------------------------|---------------------|
| 3027493                   | +      | 0.0024               | 5                      | 1                      | -                           | -           | XCV2677                      | 1074/2093                                | -                             | -                                        | -                   |
| 3038824                   | -      | 0.0029               | 3                      | 0                      | XCV2683                     | 25          | -                            | -                                        | -                             | -                                        | -                   |
| 3045902                   | -      | 0.0048               | 5                      | 1                      | XCV2688                     | 242         | XCV2689                      | 769/88                                   | -                             | -                                        | -                   |
| 3046246                   | +      | 0.0000               | 162                    | 23                     | -                           | -           | -                            | -                                        | XCV2689                       | 425/432                                  | -                   |
| 3046996                   | -      | 0.0002               | 19                     | 10                     | XCV2690                     | 29          | -                            | -                                        | -                             | -                                        | -                   |
| 3047619                   | -      | 0.0002               | 16                     | 6                      | -                           | -           | -                            | -                                        | -                             | -                                        | +                   |
| 3062769                   | +      | 0.0020               | 3                      | 0                      | XCV2703                     | 21          | -                            | -                                        | -                             | -                                        | -                   |
| 3065332                   | -      | 0.0000               | 14                     | 0                      | XCV2704                     | 0           | XCV2705                      | 110/0                                    | -                             | -                                        | -                   |
| 3068986                   | -      | 0.0043               | 6                      | 2                      | XCV2709                     | 24          | XCV2710                      | 596/24                                   | -                             | -                                        | -                   |
| 3069778                   | +      | 0.0000               | 10                     | 1                      | XCV2711                     | 43          | -                            | -                                        | -                             | -                                        | -                   |
| 3075487                   | +      | 0.0184               | 4                      | 0                      | -                           | -           | XCV2715                      | 2113/2521                                | -                             | -                                        | -                   |
| 3078655                   | +      | 0.0001               | 7                      | 0                      | XCV2716                     | 22          | -                            | -                                        | -                             | -                                        | -                   |
| 3087900                   | +      | 0.0000               | 24                     | 5                      | -                           | -           | XCV2723                      | 817/13                                   | -                             | -                                        | -                   |
| 3093405                   | +      | 0.0044               | 4                      | 1                      | -                           | -           | -                            | -                                        | XCV2725                       | 892/1999                                 | -                   |
| 3094186                   | -      | 0.0004               | 6                      | 0                      | -                           | -           | XCV2725                      | 111/2780                                 | -                             | -                                        | -                   |
| 3094539                   | -      | 0.0000               | 8                      | 0                      | XCV2725                     | 242         | -                            | -                                        | -                             | -                                        | -                   |
| 3095807                   | -      | 0.0025               | 3                      | 0                      | -                           | -           | XCV2726                      | 769/1048                                 | -                             | -                                        | -                   |
| 3103362                   | -      | 0.0033               | 3                      | 0                      | -                           | -           | XCV2729                      | 22/4333                                  | -                             | -                                        | -                   |
| 3106814                   | -      | 0.0000               | 16                     | 1                      | XCV2730                     | 214         | XCV2731                      | 164/84                                   | -                             | -                                        | -                   |
| 3108818                   | -      | 0.0114               | 3                      | 0                      | -                           | -           | XCV2732                      | 620/1734                                 | -                             | -                                        | -                   |
| 3112840                   | +      | 0.0171               | 4                      | 1                      | -                           | -           | -                            | -                                        | XCV2736                       | 959/672                                  | -                   |
| 3113638                   | +      | 0.0206               | 3                      | 0                      | -                           | -           | -                            | -                                        | XCV2736                       | 161/1470                                 | -                   |
| 3129258                   | -      | 0.0000               | 71                     | 9                      | XCV2748                     | 0           | -                            | -                                        | -                             | -                                        | -                   |
| 3130321                   | +      | 0.0015               | 5                      | 0                      | -                           | -           | XCV2750                      | 16/1636                                  | -                             | -                                        | -                   |
| 3142239                   | +      | 0.0017               | 3                      | 0                      | XCV2763                     | 4           | -                            | -                                        | -                             | -                                        | -                   |
| 3143314                   | +      | 0.0000               | 47                     | 7                      | XCV2764                     | 19          | -                            | -                                        | -                             | -                                        | -                   |
| 3151089                   | -      | 0.0019               | 4                      | 0                      | -                           | -           | XCV2770                      | 46/1018                                  | -                             | -                                        | -                   |
| 3151886                   | +      | 0.0278               | 4                      | 1                      | -                           | -           | -                            | -                                        | XCV2771<br>XCV2772            | 11/616<br>838/8                          | -                   |
| 3151905                   | -      | 0.0000               | 17                     | 2                      | XCV2771                     | 30          | XCV2772                      | 819/11                                   | -                             | -                                        | -                   |
| 3166096                   | -      | 0.0024               | 3                      | 0                      | -                           | -           | XCV2786                      | 1363/58                                  | -                             | -                                        | -                   |
| 3168287                   | -      | 0.0000               | 20                     | 1                      | XCV2787                     | 133         | -                            | -                                        | -                             | -                                        | -                   |
| 3174731                   | -      | 0.0001               | 7                      | 1                      | XCV2794                     | 263         | XCV2795                      | 1753/148                                 | -                             | -                                        | -                   |
| 3184488                   | -      | 0.0001               | 10                     | 2                      | -                           | -           | -                            | -                                        | XCV2800                       | 857/1221                                 | -                   |
| 3193300                   | +      | 0.0000               | 20                     | 2                      | -                           | -           | XCV2806                      | 817/13                                   | -                             | -                                        | -                   |
| 3196040                   | -      | 0.0001               | 12                     | 1                      | XCV2809                     | 257         | -                            | -                                        | -                             | -                                        | -                   |
| 3198093                   | -      | 0.0001               | 8                      | 0                      | XCV2811                     | 25          | -                            | -                                        | -                             | -                                        | -                   |
| 3201040                   | -      | 0.0005               | 7                      | 1                      | XCV2812                     | 90          | -                            | -                                        | XCV2813                       | 21/518                                   | -                   |
| 3201949                   | +      | 0.0156               | 4                      | 1                      | -                           | -           | -                            | -                                        | XCV2814                       | 203/201                                  | -                   |
| 3202518                   | +      | 0.0117               | 3                      | 0                      | -                           | -           | -                            | -                                        | XCV2815                       | 3413/330                                 | -                   |
| 3205497                   | -      | 0.0050               | 3                      | 0                      | -                           | -           | XCV2815                      | 434/3309                                 | -                             | -                                        | -                   |
| 3206053                   | +      | 0.0226               | 4                      | 1                      | -                           | -           | -                            | -                                        | XCV2816                       | 838/8                                    | -                   |
| 3206074                   | -      | 0.0000               | 15                     | 2                      | XCV2815                     | 143         | XCV2816                      | 817/13                                   | -                             | -                                        | -                   |
| 3207206                   | -      | 0.0292               | 6                      | 2                      | XCV2817                     | 16          | -                            | -                                        | -                             | -                                        | -                   |
| 3209078                   | +      | 0.0000               | 12                     | 0                      | -                           | -           | -                            | -                                        | XCV2820                       | 266/210                                  | -                   |
| 3209434                   | -      | 0.0000               | 28                     | 2                      | XCV2820                     | 90          | XCV2821                      | 425/90                                   | -                             | -                                        | -                   |
| 3209880                   | -      | 0.0000               | 14                     | 0                      | XCV2821                     | 21          | -                            | -                                        | -                             | -                                        | -                   |
| 3211387                   | -      | 0.0000               | 69                     | 15                     | XCV2822                     | 18          | -                            | -                                        | -                             | -                                        | -                   |
| 3214823                   | -      | 0.0020               | 3                      | 0                      | XCV2823                     | 123         | -                            | -                                        | -                             | -                                        | -                   |
| 3217042                   | -      | 0.0146               | 3                      | 1                      | XCV2826                     | 57          | -                            | -                                        | XCV2827                       | 64/639                                   | -                   |
| 3219491                   | -      | 0.0000               | 15                     | 1                      | XCV2829                     | 21          | -                            | -                                        | XCV2830                       | 38/304                                   | -                   |
| 3219506                   | +      | 0.0001               | 7                      | 0                      | XCV2831<br>XCV2830          | 289<br>23   | -                            | -                                        | XCV2829                       | 36/536                                   | -                   |
| 3223002                   | -      | 0.0142               | 3                      | 0                      | -                           | -           | XCV2833                      | 1321/790                                 | -                             | -                                        | -                   |

<sup>a</sup>, TSS position on the *Xcv* chromosome and the plasmid (pXCV183; marked with #), respectively. <sup>b</sup>, p-value indicates the significance of the annotated TSS (see METHODS). <sup>c</sup>, number of read starts at TSS position. <sup>d</sup>, TSS classification and the corresponding CDS. <sup>e</sup>, distance of the TSS to annotated start and stop codon of the corresponding CDS. <sup>f</sup>, a TSS is classified as orphan (+) if it is neither classified as primary, internal nor antisense TSS.

| TSS position <sup>a</sup> | Strand | p-value <sup>b</sup> | Library 2 <sup>c</sup> | Library 1 <sup>c</sup> | Primary <sup>d</sup> to CDS | 5' UTR (bp) | Internal <sup>d</sup> to CDS | Distance to start/stop <sup>e</sup> (bp) | Antisense <sup>d</sup> to CDS | Distance to start/stop <sup>e</sup> (bp) | Orphan <sup>f</sup> |
|---------------------------|--------|----------------------|------------------------|------------------------|-----------------------------|-------------|------------------------------|------------------------------------------|-------------------------------|------------------------------------------|---------------------|
| 3223483                   | -      | 0.0042               | 4                      | 0                      | -                           | -           | XCV2833                      | 840/1271                                 | -                             | -                                        | -                   |
| 3227994                   | -      | 0.0041               | 6                      | 1                      | -                           | -           | XCV2837                      | 1172/1539                                | -                             | -                                        | -                   |
| 3229766                   | -      | 0.0087               | 3                      | 0                      | -                           | -           | XCV2838                      | 1007/501                                 | -                             | -                                        | -                   |
| 3231114                   | -      | 0.0002               | 6                      | 1                      | -                           | -           | XCV2839                      | 254/333                                  | -                             | -                                        | -                   |
| 3233114                   | -      | 0.0008               | 3                      | 0                      | -                           | -           | XCV2840                      | 192/1268                                 | -                             | -                                        | -                   |
| 3239149                   | -      | 0.0102               | 4                      | 1                      | -                           | -           | XCV2846                      | 433/655                                  | -                             | -                                        | -                   |
| 3247561                   | -      | 0.0000               | 10                     | 1                      | XCV2854                     | 185         | XCV2855                      | 604/148                                  | -                             | -                                        | -                   |
| 3248192                   | -      | 0.0005               | 9                      | 0                      | XCV2855                     | 27          | -                            | -                                        | XCV2856                       | 86/883                                   | -                   |
| 3258473                   | +      | 0.0169               | 3                      | 1                      | -                           | -           | -                            | -                                        | XCV2864                       | 21/905                                   | -                   |
| 3259835                   | -      | 0.0036               | 5                      | 1                      | XCV2865                     | 289         | XCV2866                      | 769/88                                   | -                             | -                                        | -                   |
| 3260179                   | +      | 0.0000               | 162                    | 23                     | -                           | -           | -                            | -                                        | XCV2866                       | 425/432                                  | -                   |
| 3260929                   | -      | 0.0004               | 19                     | 10                     | XCV2867                     | 29          | XCV2868                      | 266/75                                   | -                             | -                                        | -                   |
| 3262486                   | -      | 0.0007               | 10                     | 3                      | XCV2869                     | 31          | -                            | -                                        | XCV2870                       | 74/997                                   | -                   |
| 3267661                   | -      | 0.0000               | 16                     | 3                      | -                           | -           | XCV2874                      | 105/1976                                 | -                             | -                                        | -                   |
| 3270081                   | -      | 0.0406               | 4                      | 2                      | -                           | -           | XCV2876                      | 462/647                                  | -                             | -                                        | -                   |
| 3272560                   | -      | 0.0050               | 4                      | 1                      | XCV2878                     | 23          | -                            | -                                        | XCV2879                       | 58/705                                   | -                   |
| 3272598                   | +      | 0.0103               | 4                      | 1                      | XCV2879                     | 20          | -                            | -                                        | XCV2878                       | 61/984                                   | -                   |
| 3275968                   | -      | 0.0158               | 6                      | 3                      | XCV2881                     | 21          | -                            | -                                        | -                             | -                                        | -                   |
| 3276220                   | +      | 0.0041               | 5                      | 1                      | XCV2882                     | 20          | -                            | -                                        | -                             | -                                        | -                   |
| 3278748                   | +      | 0.0019               | 5                      | 1                      | XCV2884                     | 23          | -                            | -                                        | -                             | -                                        | -                   |
| 3284009                   | -      | 0.0058               | 3                      | 0                      | XCV2887                     | 42          | -                            | -                                        | -                             | -                                        | -                   |
| 3285246                   | +      | 0.0000               | 12                     | 1                      | XCV2890                     | 23          | -                            | -                                        | -                             | -                                        | -                   |
| 3285826                   | +      | 0.0001               | 8                      | 1                      | XCV2891                     | 21          | -                            | -                                        | -                             | -                                        | -                   |
| 3290997                   | -      | 0.0001               | 12                     | 2                      | -                           | -           | -                            | -                                        | -                             | -                                        | +                   |
| 3291196                   | +      | 0.0042               | 4                      | 1                      | XCV2895                     | 107         | -                            | -                                        | -                             | -                                        | -                   |
| 3292629                   | +      | 0.0216               | 3                      | 0                      | -                           | -           | XCV2896                      | 652/1678                                 | -                             | -                                        | -                   |
| 3296402                   | +      | 0.0003               | 5                      | 0                      | XCV2898                     | 28          | -                            | -                                        | -                             | -                                        | -                   |
| 3298935                   | +      | 0.0001               | 7                      | 0                      | -                           | -           | XCV2899                      | 236/2115                                 | -                             | -                                        | -                   |
| 3301211                   | +      | 0.0002               | 8                      | 1                      | XCV2900                     | 27          | -                            | -                                        | -                             | -                                        | -                   |
| 3304175                   | -      | 0.0012               | 14                     | 0                      | XCV2901                     | 18          | -                            | -                                        | -                             | -                                        | -                   |
| 3304605                   | -      | 0.0124               | 3                      | 0                      | XCV2902                     | 0           | -                            | -                                        | -                             | -                                        | -                   |
| 3309674                   | +      | 0.0010               | 4                      | 0                      | XCV2907                     | 27          | -                            | -                                        | XCV2906                       | 83/559                                   | -                   |
| 3309679                   | -      | 0.0000               | 34                     | 2                      | XCV2906                     | 88          | -                            | -                                        | XCV2907                       | 22/561                                   | -                   |
| 3310327                   | +      | 0.0000               | 35                     | 2                      | XCV2908                     | 26          | -                            | -                                        | -                             | -                                        | -                   |
| 3311814                   | -      | 0.0012               | 7                      | 2                      | XCV2909                     | 23          | -                            | -                                        | -                             | -                                        | -                   |
| 3316609                   | +      | 0.0010               | 4                      | 0                      | -                           | -           | XCV2914                      | 211/1138                                 | -                             | -                                        | -                   |
| 3317782                   | +      | 0.0000               | 48                     | 8                      | XCV2916<br>XCV2915          | 262<br>0    | -                            | -                                        | -                             | -                                        | -                   |
| 3320950                   | -      | 0.0001               | 12                     | 3                      | XCV2919                     | 23          | -                            | -                                        | -                             | -                                        | -                   |
| 3323956                   | -      | 0.0145               | 3                      | 1                      | -                           | -           | XCV2923                      | 1168/274                                 | -                             | -                                        | -                   |
| 3325124                   | -      | 0.0022               | 8                      | 3                      | XCV2923                     | 0           | -                            | -                                        | XCV2924                       | 51/848                                   | -                   |
| 3332244                   | +      | 0.0000               | 19                     | 1                      | XCV2929                     | 17          | -                            | -                                        | -                             | -                                        | -                   |
| 3334516                   | -      | 0.0000               | 17                     | 1                      | XCV2931                     | 0           | -                            | -                                        | -                             | -                                        | -                   |
| 3336764                   | -      | 0.0000               | 16                     | 0                      | XCV2933                     | 20          | -                            | -                                        | -                             | -                                        | -                   |
| 3339362                   | -      | 0.0000               | 14                     | 0                      | XCV2936                     | 0           | -                            | -                                        | -                             | -                                        | -                   |
| 3341585                   | -      | 0.0005               | 9                      | 2                      | -                           | -           | XCV2938                      | 1132/1663                                | -                             | -                                        | -                   |
| 3343425                   | +      | 0.0027               | 7                      | 0                      | XCV2940                     | 28          | -                            | -                                        | -                             | -                                        | -                   |
| 3348398                   | +      | 0.0001               | 12                     | 3                      | XCV2944                     | 173         | -                            | -                                        | -                             | -                                        | -                   |
| 3349667                   | -      | 0.0231               | 3                      | 0                      | -                           | -           | -                            | -                                        | XCV2944                       | 1096/1102                                | -                   |
| 3355947                   | +      | 0.0211               | 3                      | 0                      | -                           | -           | XCV2950                      | 704/711                                  | -                             | -                                        | -                   |
| 3358746                   | +      | 0.0002               | 11                     | 3                      | XCV2955                     | 22          | XCV2954                      | 148/1                                    | -                             | -                                        | -                   |
| 3373502                   | -      | 0.0004               | 6                      | 0                      | XCV2966                     | 25          | -                            | -                                        | -                             | -                                        | -                   |
| 3377499                   | +      | 0.0000               | 8                      | 0                      | XCV2970                     | 0           | -                            | -                                        | -                             | -                                        | -                   |
| 3379701                   | -      | 0.0001               | 7                      | 1                      | -                           | -           | XCV2971                      | 37/1087                                  | -                             | -                                        | -                   |

<sup>a</sup>, TSS position on the *Xcv* chromosome and the plasmid (pXCV183; marked with #), respectively. <sup>b</sup>, p-value indicates the significance of the annotated TSS (see METHODS). <sup>c</sup>, number of read starts at TSS position. <sup>d</sup>, TSS classification and the corresponding CDS. <sup>e</sup>, distance of the TSS to annotated start and stop codon of the corresponding CDS. <sup>f</sup>, a TSS is classified as orphan (+) if it is neither classified as primary, internal nor antisense TSS.

| TSS position <sup>a</sup> | Strand | p-value <sup>b</sup> | Library 2 <sup>c</sup> | Library 1 <sup>c</sup> | Primary <sup>d</sup> to CDS | 5' UTR (bp) | Internal <sup>d</sup> to CDS | Distance to start/stop <sup>e</sup> (bp) | Antisense <sup>d</sup> to CDS | Distance to start/stop <sup>e</sup> (bp) | Orphan <sup>f</sup> |
|---------------------------|--------|----------------------|------------------------|------------------------|-----------------------------|-------------|------------------------------|------------------------------------------|-------------------------------|------------------------------------------|---------------------|
| 3380658                   | -      | 0.0147               | 4                      | 0                      | -                           | -           | XCV2972                      | 39/719                                   | -                             | -                                        | -                   |
| 3381360                   | -      | 0.0035               | 3                      | 0                      | -                           | -           | XCV2973                      | 1843/559                                 | -                             | -                                        | -                   |
| 3385409                   | -      | 0.0000               | 12                     | 1                      | -                           | -           | XCV2974                      | 46/619                                   | XCV2975                       | 46/619                                   | -                   |
| 3388971                   | -      | 0.0035               | 5                      | 0                      | XCV2981                     | 23          | -                            | -                                        | -                             | -                                        | -                   |
| 3390399                   | +      | 0.0035               | 3                      | 0                      | XCV2983                     | 0           | -                            | -                                        | -                             | -                                        | -                   |
| 3395819                   | -      | 0.0027               | 5                      | 2                      | XCV2987                     | 82          | -                            | -                                        | -                             | -                                        | -                   |
| 3402000                   | +      | 0.0000               | 13                     | 3                      | -                           | -           | XCV2992                      | 179/66                                   | -                             | -                                        | -                   |
| 3403164                   | -      | 0.0051               | 3                      | 0                      | -                           | -           | -                            | -                                        | XCV2993                       | 743/1092                                 | -                   |
| 3408906                   | -      | 0.0127               | 4                      | 0                      | -                           | -           | -                            | -                                        | -                             | -                                        | +                   |
| 3410761                   | +      | 0.0000               | 15                     | 3                      | XCV3000                     | 6           | -                            | -                                        | -                             | -                                        | -                   |
| 3413795                   | -      | 0.0049               | 5                      | 0                      | -                           | -           | XCV3002                      | 256/1246                                 | -                             | -                                        | -                   |
| 3418545                   | +      | 0.0055               | 4                      | 0                      | XCV3005                     | 16          | -                            | -                                        | -                             | -                                        | -                   |
| 3424210                   | -      | 0.0016               | 5                      | 0                      | -                           | -           | XCV3010                      | 63/599                                   | -                             | -                                        | -                   |
| 3426246                   | +      | 0.0002               | 10                     | 2                      | XCV3013                     | 178         | -                            | -                                        | -                             | -                                        | -                   |
| 3429740                   | +      | 0.0009               | 4                      | 0                      | XCV3016                     | 0           | -                            | -                                        | -                             | -                                        | -                   |
| 3449971                   | -      | 0.0042               | 4                      | 1                      | XCV3029                     | 27          | -                            | -                                        | XCV3030                       | 76/786                                   | -                   |
| 3450047                   | +      | 0.0067               | 4                      | 1                      | XCV3030                     | 0           | -                            | -                                        | -                             | -                                        | -                   |
| 3452981                   | +      | 0.0000               | 14                     | 1                      | XCV3033                     | 110         | -                            | -                                        | -                             | -                                        | -                   |
| 3455491                   | +      | 0.0025               | 6                      | 0                      | XCV3036                     | 21          | -                            | -                                        | -                             | -                                        | -                   |
| 3459115                   | -      | 0.0105               | 10                     | 5                      | -                           | -           | XCV3037                      | 8/693                                    | -                             | -                                        | -                   |
| 3473908                   | -      | 0.0000               | 57                     | 0                      | XCV3049                     | 55          | -                            | -                                        | -                             | -                                        | -                   |
| 3474110                   | +      | 0.0001               | 9                      | 1                      | XCV3050                     | 19          | -                            | -                                        | -                             | -                                        | -                   |
| 3477013                   | -      | 0.0179               | 3                      | 1                      | -                           | -           | XCV3053                      | 848/555                                  | -                             | -                                        | -                   |
| 3478034                   | -      | 0.0001               | 6                      | 0                      | XCV3053                     | 173         | XCV3054                      | 1163/189                                 | -                             | -                                        | -                   |
| 3482294                   | -      | 0.0016               | 4                      | 0                      | XCV3056                     | 49          | -                            | -                                        | -                             | -                                        | -                   |
| 3485108                   | -      | 0.0003               | 5                      | 0                      | -                           | -           | XCV3059                      | 65/621                                   | -                             | -                                        | -                   |
| 3485693                   | -      | 0.0001               | 11                     | 0                      | XCV3060                     | 23          | -                            | -                                        | -                             | -                                        | -                   |
| 3487971                   | -      | 0.0010               | 7                      | 0                      | XCV3063                     | 0           | -                            | -                                        | -                             | -                                        | -                   |
| 3488858                   | +      | 0.0200               | 8                      | 0                      | -                           | -           | XCV3065                      | 12/893                                   | -                             | -                                        | -                   |
| 3491956                   | -      | 0.0038               | 3                      | 0                      | -                           | -           | XCV3067                      | 280/847                                  | -                             | -                                        | -                   |
| 3493428                   | -      | 0.0000               | 11                     | 1                      | XCV3068                     | 42          | -                            | -                                        | -                             | -                                        | -                   |
| 3496031                   | +      | 0.0002               | 13                     | 8                      | -                           | -           | XCV3071                      | 421/346                                  | -                             | -                                        | -                   |
| 3496288                   | +      | 0.0000               | 13                     | 3                      | XCV3072                     | 199         | XCV3071                      | 678/89                                   | -                             | -                                        | -                   |
| 3497562                   | +      | 0.0024               | 3                      | 0                      | XCV3074                     | 22          | -                            | -                                        | -                             | -                                        | -                   |
| 3498161                   | +      | 0.0052               | 7                      | 2                      | XCV3075                     | 21          | -                            | -                                        | -                             | -                                        | -                   |
| 3505699                   | +      | 0.0000               | 18                     | 4                      | XCV3083                     | 0           | -                            | -                                        | -                             | -                                        | -                   |
| 3518387                   | -      | 0.0000               | 994                    | 98                     | XCV3096                     | 0           | -                            | -                                        | -                             | -                                        | -                   |
| 3525219                   | -      | 0.0000               | 10                     | 0                      | XCV3103                     | 14          | -                            | -                                        | -                             | -                                        | -                   |
| 3525280                   | +      | 0.0031               | 3                      | 0                      | XCV3104                     | 57          | -                            | -                                        | XCV3103                       | 75/1184                                  | -                   |
| 3528942                   | +      | 0.0037               | 3                      | 0                      | -                           | -           | XCV3108                      | 507/173                                  | -                             | -                                        | -                   |
| 3531766                   | -      | 0.0000               | 12                     | 1                      | XCV3111                     | 281         | XCV3112                      | 8/246                                    | XCV3113                       | 32/1030                                  | -                   |
| 3533944                   | +      | 0.0020               | 4                      | 1                      | XCV3116                     | 2           | XCV3115                      | 551/21                                   | -                             | -                                        | -                   |
| 3534466                   | +      | 0.0045               | 3                      | 1                      | XCV3117                     | 40          | XCV3116                      | 520/37                                   | -                             | -                                        | -                   |
| 3536664                   | +      | 0.0000               | 95                     | 12                     | XCV3119                     | 129         | XCV3118                      | 1356/38                                  | -                             | -                                        | -                   |
| 3539930                   | +      | 0.0284               | 24                     | 15                     | XCV3123                     | 0           | -                            | -                                        | -                             | -                                        | -                   |
| 3539954                   | +      | 0.0062               | 11                     | 0                      | -                           | -           | XCV3123                      | 24/365                                   | -                             | -                                        | -                   |
| 3544261                   | +      | 0.0001               | 10                     | 1                      | XCV3127                     | 23          | -                            | -                                        | -                             | -                                        | -                   |
| 3545188                   | -      | 0.0029               | 5                      | 1                      | -                           | -           | XCV3128                      | 970/43                                   | -                             | -                                        | -                   |
| 3551148                   | -      | 0.0015               | 4                      | 0                      | XCV3131                     | 23          | -                            | -                                        | -                             | -                                        | -                   |
| 3557788                   | -      | 0.0203               | 4                      | 0                      | -                           | -           | XCV3138                      | 1006/385                                 | -                             | -                                        | -                   |
| 3573400                   | -      | 0.0028               | 8                      | 3                      | XCV3149                     | 21          | -                            | -                                        | XCV3150                       | 79/1449                                  | -                   |
| 3574632                   | -      | 0.0019               | 4                      | 0                      | -                           | -           | -                            | -                                        | XCV3150                       | 1153/217                                 | -                   |
| 3575831                   | -      | 0.0011               | 3                      | 0                      | -                           | -           | XCV3152                      | 752/411                                  | -                             | -                                        | -                   |
| 3581398                   | -      | 0.0058               | 4                      | 1                      | XCV3159                     | 23          | -                            | -                                        | -                             | -                                        | -                   |

<sup>a</sup>, TSS position on the *Xcv* chromosome and the plasmid (pXCV183; marked with #), respectively. <sup>b</sup>, p-value indicates the significance of the annotated TSS (see METHODS). <sup>c</sup>, number of read starts at TSS position. <sup>d</sup>, TSS classification and the corresponding CDS. <sup>e</sup>, distance of the TSS to annotated start and stop codon of the corresponding CDS. <sup>f</sup>, a TSS is classified as orphan (+) if it is neither classified as primary, internal nor antisense TSS.

| TSS position <sup>a</sup> | Strand | p-value <sup>b</sup> | Library 2 <sup>c</sup> | Library 1 <sup>c</sup> | Primary <sup>d</sup> to CDS | 5' UTR (bp) | Internal <sup>d</sup> to CDS | Distance to start/stop <sup>e</sup> (bp) | Antisense <sup>d</sup> to CDS | Distance to start/stop <sup>e</sup> (bp) | Orphan <sup>f</sup> |
|---------------------------|--------|----------------------|------------------------|------------------------|-----------------------------|-------------|------------------------------|------------------------------------------|-------------------------------|------------------------------------------|---------------------|
| 3583485                   | +      | 0.0094               | 5                      | 1                      | XCV3163<br>XCV3162          | 269<br>0    | -                            | -                                        | -                             | -                                        | -                   |
| 3590242                   | -      | 0.0437               | 7                      | 0                      | XCV3165                     | 21          | -                            | -                                        | -                             | -                                        | -                   |
| 3601774                   | -      | 0.0055               | 4                      | 1                      | XCV3168                     | 22          | -                            | -                                        | XCV3169                       | 75/734                                   | -                   |
| 3601849                   | +      | 0.0033               | 8                      | 3                      | XCV3169                     | 0           | -                            | -                                        | XCV3168                       | 97/3669                                  | -                   |
| 3603357                   | +      | 0.0017               | 3                      | 0                      | -                           | -           | XCV3171                      | 276/290                                  | -                             | -                                        | -                   |
| 3610521                   | -      | 0.0000               | 53                     | 4                      | XCV3177                     | 188         | -                            | -                                        | -                             | -                                        | -                   |
| 3616498                   | -      | 0.0000               | 26                     | 5                      | XCV3182                     | 24          | XCV3183                      | 982/61                                   | -                             | -                                        | -                   |
| 3620330                   | +      | 0.0000               | 31                     | 3                      | XCV3187                     | 89          | -                            | -                                        | -                             | -                                        | -                   |
| 3620973                   | +      | 0.0033               | 9                      | 13                     | -                           | -           | XCV3187                      | 554/2343                                 | -                             | -                                        | -                   |
| 3622644                   | -      | 0.0072               | 3                      | 0                      | -                           | -           | -                            | -                                        | XCV3187                       | 2225/672                                 | -                   |
| 3622778                   | +      | 0.0000               | 6                      | 3                      | -                           | -           | XCV3187                      | 2359/538                                 | -                             | -                                        | -                   |
| 3624042                   | -      | 0.0000               | 14                     | 2                      | -                           | -           | XCV3188                      | 42/605                                   | -                             | -                                        | -                   |
| 3628252                   | -      | 0.0020               | 4                      | 0                      | XCV3191                     | 23          | -                            | -                                        | -                             | -                                        | -                   |
| 3629839                   | -      | 0.0000               | 9                      | 0                      | XCV3192                     | 69          | -                            | -                                        | -                             | -                                        | -                   |
| 3630079                   | +      | 0.0000               | 41                     | 5                      | XCV3193                     | 25          | -                            | -                                        | -                             | -                                        | -                   |
| 3630391                   | +      | 0.0204               | 4                      | 0                      | -                           | -           | XCV3193                      | 287/1089                                 | -                             | -                                        | -                   |
| 3634081                   | -      | 0.0009               | 6                      | 1                      | XCV3195                     | 36          | -                            | -                                        | -                             | -                                        | -                   |
| 3634438                   | -      | 0.0010               | 7                      | 0                      | -                           | -           | XCV3196                      | 865/241                                  | -                             | -                                        | -                   |
| 3635324                   | -      | 0.0001               | 10                     | 0                      | XCV3196                     | 21          | -                            | -                                        | -                             | -                                        | -                   |
| 3639271                   | +      | 0.0000               | 16                     | 2                      | XCV3202                     | 0           | -                            | -                                        | XCV3201                       | 33/587                                   | -                   |
| 3639290                   | -      | 0.0003               | 10                     | 2                      | XCV3201                     | 52          | -                            | -                                        | XCV3202                       | 19/1396                                  | -                   |
| 3643121                   | +      | 0.0000               | 43                     | 3                      | -                           | -           | -                            | -                                        | XCV3205                       | 79/246                                   | -                   |
| 3672452                   | -      | 0.0000               | 9                      | 0                      | -                           | -           | XCV3222                      | 757/304                                  | -                             | -                                        | -                   |
| 3673257                   | -      | 0.0074               | 4                      | 1                      | XCV3222                     | 48          | -                            | -                                        | -                             | -                                        | -                   |
| 3680238                   | -      | 0.0221               | 4                      | 1                      | -                           | -           | XCV3228                      | 238/967                                  | -                             | -                                        | -                   |
| 3682598                   | -      | 0.0019               | 6                      | 1                      | -                           | -           | XCV3229                      | 5082/2132                                | -                             | -                                        | -                   |
| 3683097                   | -      | 0.0018               | 3                      | 0                      | -                           | -           | XCV3229                      | 4583/2631                                | -                             | -                                        | -                   |
| 3684784                   | -      | 0.0103               | 3                      | 1                      | -                           | -           | XCV3229                      | 2896/4318                                | -                             | -                                        | -                   |
| 3691234                   | -      | 0.0115               | 16                     | 7                      | XCV3233                     | 53          | -                            | -                                        | -                             | -                                        | -                   |
| 3691397                   | +      | 0.0047               | 4                      | 0                      | XCV3234                     | 21          | -                            | -                                        | -                             | -                                        | -                   |
| 3698089                   | -      | 0.0219               | 3                      | 1                      | -                           | -           | XCV3240                      | 342/179                                  | -                             | -                                        | -                   |
| 3700913                   | -      | 0.0008               | 7                      | 1                      | XCV3241                     | 21          | -                            | -                                        | -                             | -                                        | -                   |
| 3710992                   | +      | 0.0001               | 11                     | 0                      | XCV3249                     | 14          | -                            | -                                        | -                             | -                                        | -                   |
| 3713718                   | +      | 0.0000               | 10                     | 1                      | XCV3251                     | 45          | -                            | -                                        | -                             | -                                        | -                   |
| 3721917                   | -      | 0.0320               | 3                      | 1                      | XCV3253                     | 44          | -                            | -                                        | XCV3254                       | 59/604                                   | -                   |
| 3725397                   | +      | 0.0001               | 7                      | 0                      | -                           | -           | XCV3257                      | 7/421                                    | -                             | -                                        | -                   |
| 3727405                   | +      | 0.0000               | 21                     | 1                      | -                           | -           | -                            | -                                        | -                             | -                                        | +                   |
| 3728571                   | +      | 0.0000               | 32                     | 1                      | XCV3260                     | 18          | -                            | -                                        | -                             | -                                        | -                   |
| 3732545                   | +      | 0.0081               | 3                      | 0                      | XCV3264                     | 21          | -                            | -                                        | XCV3263                       | 81/704                                   | -                   |
| 3735352                   | +      | 0.0000               | 13                     | 1                      | XCV3268                     | 26          | -                            | -                                        | XCV3267                       | 23/1255                                  | -                   |
| 3738534                   | -      | 0.0000               | 177                    | 26                     | XCV3271                     | 42          | -                            | -                                        | -                             | -                                        | -                   |
| 3739927                   | -      | 0.0263               | 4                      | 1                      | XCV3272                     | 58          | -                            | -                                        | -                             | -                                        | -                   |
| 3744037                   | -      | 0.0006               | 6                      | 1                      | XCV3277                     | 0           | -                            | -                                        | -                             | -                                        | -                   |
| 3746306                   | -      | 0.0008               | 5                      | 0                      | -                           | -           | XCV3279                      | 796/1105                                 | -                             | -                                        | -                   |
| 3748830                   | -      | 0.0020               | 3                      | 0                      | XCV3281                     | 265         | XCV3282                      | 594/131                                  | -                             | -                                        | -                   |
| 3749453                   | -      | 0.0000               | 22                     | 4                      | XCV3282                     | 29          | -                            | -                                        | -                             | -                                        | -                   |
| 3750836                   | -      | 0.0003               | 6                      | 0                      | XCV3284                     | 22          | -                            | -                                        | XCV3285                       | 23/435                                   | -                   |
| 3763733                   | -      | 0.0193               | 3                      | 0                      | XCV3293                     | 20          | -                            | -                                        | XCV3294                       | 81/953                                   | -                   |
| 3765356                   | -      | 0.0062               | 4                      | 0                      | XCV3295                     | 19          | -                            | -                                        | -                             | -                                        | -                   |
| 3767403                   | +      | 0.0000               | 14                     | 2                      | XCV3297                     | 91          | -                            | -                                        | XCV3296                       | 41/2002                                  | -                   |
| 3793853                   | -      | 0.0018               | 4                      | 0                      | XCV3315                     | 51          | XCV3316                      | 466/55                                   | -                             | -                                        | -                   |
| 3804274                   | -      | 0.0017               | 3                      | 0                      | -                           | -           | XCV3324                      | 604/1978                                 | -                             | -                                        | -                   |
| 3819837                   | +      | 0.0000               | 21                     | 0                      | XCV3337                     | 152         | -                            | -                                        | -                             | -                                        | -                   |

<sup>a</sup>, TSS position on the *Xcv* chromosome and the plasmid (pXCV183; marked with #), respectively. <sup>b</sup>, p-value indicates the significance of the annotated TSS (see METHODS). <sup>c</sup>, number of read starts at TSS position. <sup>d</sup>, TSS classification and the corresponding CDS. <sup>e</sup>, distance of the TSS to annotated start and stop codon of the corresponding CDS. <sup>f</sup>, a TSS is classified as orphan (+) if it is neither classified as primary, internal nor antisense TSS.

| TSS position <sup>a</sup> | Strand | p-value <sup>b</sup> | Library 2 <sup>c</sup> | Library 1 <sup>c</sup> | Primary <sup>d</sup> to CDS | 5' UTR (bp) | Internal <sup>d</sup> to CDS | Distance to start/stop <sup>e</sup> (bp) | Antisense <sup>d</sup> to CDS | Distance to start/stop <sup>e</sup> (bp) | Orphan <sup>f</sup> |
|---------------------------|--------|----------------------|------------------------|------------------------|-----------------------------|-------------|------------------------------|------------------------------------------|-------------------------------|------------------------------------------|---------------------|
| 3827398                   | -      | 0.0129               | 3                      | 1                      | -                           | -           | XCV3342                      | 613/379                                  | -                             | -                                        | -                   |
| 3828101                   | +      | 0.0000               | 14                     | 0                      | XCV3343                     | 32          | -                            | -                                        | XCV3342                       | 90/1082                                  | -                   |
| 3832104                   | -      | 0.0006               | 5                      | 0                      | XCV3345                     | 170         | XCV3346                      | 132/155                                  | -                             | -                                        | -                   |
| 3834377                   | +      | 0.0206               | 3                      | 0                      | -                           | -           | -                            | -                                        | XCV3349                       | 459/707                                  | -                   |
| 3837008                   | +      | 0.0000               | 18                     | 0                      | -                           | -           | XCV3351                      | 60/1391                                  | -                             | -                                        | -                   |
| 3840372                   | -      | 0.0000               | 59                     | 3                      | XCV3352                     | 22          | -                            | -                                        | -                             | -                                        | -                   |
| 3840688                   | +      | 0.0000               | 27                     | 0                      | -                           | -           | -                            | -                                        | XCV3353                       | 224/201                                  | -                   |
| 3841040                   | -      | 0.0000               | 41                     | 9                      | XCV3353                     | 128         | -                            | -                                        | -                             | -                                        | -                   |
| 3841288                   | -      | 0.0375               | 6                      | 0                      | -                           | -           | -                            | -                                        | XCV3354                       | 34/1225                                  | -                   |
| 3841563                   | +      | 0.0014               | 3                      | 0                      | -                           | -           | XCV3354                      | 309/950                                  | -                             | -                                        | -                   |
| 3842377                   | +      | 0.0037               | 4                      | 1                      | XCV3355                     | 146         | XCV3354                      | 1123/136                                 | -                             | -                                        | -                   |
| 3845146                   | -      | 0.0280               | 3                      | 1                      | -                           | -           | -                            | -                                        | XCV3357                       | 953/84                                   | -                   |
| 3850198                   | +      | 0.0000               | 23                     | 2                      | -                           | -           | XCV3360                      | 817/13                                   | -                             | -                                        | -                   |
| 3854811                   | -      | 0.0000               | 12                     | 1                      | XCV3366                     | 29          | -                            | -                                        | -                             | -                                        | -                   |
| 3859554                   | -      | 0.0002               | 6                      | 0                      | XCV3370                     | 25          | -                            | -                                        | -                             | -                                        | -                   |
| 3861697                   | -      | 0.0004               | 6                      | 0                      | -                           | -           | -                            | -                                        | -                             | -                                        | +                   |
| 3862413                   | +      | 0.0057               | 7                      | 3                      | XCV3376                     | 0           | -                            | -                                        | -                             | -                                        | -                   |
| 3866613                   | -      | 0.0029               | 3                      | 0                      | XCV3380                     | 25          | -                            | -                                        | -                             | -                                        | -                   |
| 3868645                   | -      | 0.0063               | 3                      | 0                      | -                           | -           | XCV3381                      | 1945/2014                                | -                             | -                                        | -                   |
| 3871397                   | -      | 0.0028               | 5                      | 1                      | XCV3382                     | 115         | XCV3383                      | 769/88                                   | -                             | -                                        | -                   |
| 3871741                   | +      | 0.0000               | 162                    | 23                     | -                           | -           | -                            | -                                        | XCV3383                       | 425/432                                  | -                   |
| 3872491                   | -      | 0.0072               | 19                     | 10                     | XCV3384                     | 29          | -                            | -                                        | XCV3385                       | 17/252                                   | -                   |
| 3872641                   | -      | 0.0000               | 20                     | 0                      | XCV3384                     | 179         | -                            | -                                        | XCV3385                       | 167/102                                  | -                   |
| 3873924                   | +      | 0.0000               | 20                     | 2                      | -                           | -           | XCV3387                      | 817/13                                   | XCV3388                       | 285/46                                   | -                   |
| 3877920                   | -      | 0.0000               | 26                     | 2                      | XCV3391                     | 247         | -                            | -                                        | -                             | -                                        | -                   |
| 3880139                   | -      | 0.0000               | 52                     | 3                      | -                           | -           | XCV3392                      | 46/1567                                  | XCV3393                       | 35/703                                   | -                   |
| 3880635                   | -      | 0.0105               | 3                      | 0                      | -                           | -           | -                            | -                                        | XCV3393                       | 461/207                                  | -                   |
| 3884056                   | +      | 0.0001               | 20                     | 9                      | XCV3397                     | 29          | XCV3396                      | 1586/75                                  | -                             | -                                        | -                   |
| 3884806                   | -      | 0.0000               | 170                    | 21                     | -                           | -           | -                            | -                                        | XCV3398                       | 425/432                                  | -                   |
| 3885150                   | +      | 0.0048               | 5                      | 1                      | -                           | -           | XCV3398                      | 769/88                                   | -                             | -                                        | -                   |
| 3886210                   | +      | 0.0000               | 17                     | 6                      | XCV3399                     | 173         | -                            | -                                        | -                             | -                                        | -                   |
| 3886493                   | -      | 0.0037               | 4                      | 0                      | -                           | -           | -                            | -                                        | XCV3399                       | 110/1965                                 | -                   |
| 3897296                   | -      | 0.0000               | 42                     | 7                      | XCV3408                     | 24          | -                            | -                                        | -                             | -                                        | -                   |
| 3897851                   | +      | 0.0000               | 162                    | 23                     | -                           | -           | -                            | -                                        | XCV3409                       | 425/432                                  | -                   |
| 3898601                   | -      | 0.0002               | 19                     | 10                     | XCV3410                     | 29          | -                            | -                                        | -                             | -                                        | -                   |
| 3899941                   | -      | 0.0104               | 5                      | 0                      | -                           | -           | XCV3413                      | 1081/61                                  | XCV3412                       | 888/64                                   | -                   |
| 3903440                   | +      | 0.0000               | 13                     | 1                      | XCV3416<br>XCV3417          | 0<br>250    | -                            | -                                        | -                             | -                                        | -                   |
| 3908082                   | +      | 0.0002               | 7                      | 0                      | XCV3421                     | 27          | -                            | -                                        | -                             | -                                        | -                   |
| 3909587                   | +      | 0.0055               | 3                      | 0                      | XCV3424                     | 36          | -                            | -                                        | -                             | -                                        | -                   |
| 3910153                   | +      | 0.0074               | 4                      | 1                      | XCV3425                     | 25          | -                            | -                                        | -                             | -                                        | -                   |
| 3920060                   | -      | 0.0008               | 8                      | 1                      | XCV3430                     | 142         | -                            | -                                        | XCV3431                       | 77/2038                                  | -                   |
| 3927580                   | +      | 0.0000               | 15                     | 1                      | -                           | -           | -                            | -                                        | -                             | -                                        | +                   |
| 3931813                   | -      | 0.0000               | 14                     | 1                      | XCV3437                     | 22          | -                            | -                                        | -                             | -                                        | -                   |
| 3935639                   | +      | 0.0044               | 4                      | 0                      | -                           | -           | XCV3440                      | 1960/1993                                | -                             | -                                        | -                   |
| 3939554                   | -      | 0.0018               | 5                      | 1                      | -                           | -           | -                            | -                                        | XCV3442                       | 1004/306                                 | -                   |
| 3944243                   | -      | 0.0036               | 4                      | 0                      | XCV3444                     | 21          | -                            | -                                        | -                             | -                                        | -                   |
| 3944604                   | -      | 0.0033               | 3                      | 0                      | -                           | -           | -                            | -                                        | -                             | -                                        | +                   |
| 3956443                   | -      | 0.0040               | 8                      | 3                      | -                           | -           | XCV3452                      | 111/434                                  | -                             | -                                        | -                   |
| 3956726                   | +      | 0.0022               | 5                      | 0                      | -                           | -           | XCV3453                      | 144/1214                                 | -                             | -                                        | -                   |
| 3962678                   | +      | 0.0000               | 9                      | 0                      | XCV3460                     | 19          | -                            | -                                        | -                             | -                                        | -                   |
| 3963400                   | +      | 0.0000               | 26                     | 4                      | XCV3461                     | 0           | -                            | -                                        | -                             | -                                        | -                   |
| 3964399                   | -      | 0.0202               | 3                      | 0                      | -                           | -           | XCV3462                      | 760/241                                  | -                             | -                                        | -                   |
| 3965186                   | -      | 0.0002               | 5                      | 0                      | XCV3462                     | 27          | -                            | -                                        | -                             | -                                        | -                   |

<sup>a</sup>, TSS position on the *Xcv* chromosome and the plasmid (pXCV183; marked with #), respectively. <sup>b</sup>, p-value indicates the significance of the annotated TSS (see METHODS). <sup>c</sup>, number of read starts at TSS position. <sup>d</sup>, TSS classification and the corresponding CDS. <sup>e</sup>, distance of the TSS to annotated start and stop codon of the corresponding CDS. <sup>f</sup>, a TSS is classified as orphan (+) if it is neither classified as primary, internal nor antisense TSS.

| TSS position <sup>a</sup> | Strand | p-value <sup>b</sup> | Library 2 <sup>c</sup> | Library 1 <sup>c</sup> | Primary <sup>d</sup> to CDS | 5' UTR (bp) | Internal <sup>d</sup> to CDS | Distance to start/stop <sup>e</sup> (bp) | Antisense <sup>d</sup> to CDS | Distance to start/stop <sup>e</sup> (bp) | Orphan <sup>f</sup> |
|---------------------------|--------|----------------------|------------------------|------------------------|-----------------------------|-------------|------------------------------|------------------------------------------|-------------------------------|------------------------------------------|---------------------|
| 3969443                   | -      | 0.0020               | 3                      | 0                      | XCV3465                     | 258         | -                            | -                                        | -                             | -                                        | -                   |
| 3974418                   | -      | 0.0003               | 6                      | 0                      | XCV3468                     | 65          | -                            | -                                        | -                             | -                                        | -                   |
| 3975609                   | -      | 0.0000               | 36                     | 5                      | XCV3469                     | 45          | -                            | -                                        | -                             | -                                        | -                   |
| 3976811                   | +      | 0.0112               | 5                      | 2                      | XCV3471                     | 26          | -                            | -                                        | -                             | -                                        | -                   |
| 3977787                   | -      | 0.0001               | 9                      | 1                      | -                           | -           | -                            | -                                        | XCV3472                       | 209/402                                  | -                   |
| 3978409                   | +      | 0.0002               | 8                      | 0                      | -                           | -           | XCV3473                      | 141/812                                  | -                             | -                                        | -                   |
| 3980115                   | +      | 0.0007               | 5                      | 0                      | XCV3475                     | 23          | -                            | -                                        | -                             | -                                        | -                   |
| 3984582                   | -      | 0.0403               | 3                      | 1                      | -                           | -           | XCV3481                      | 71/381                                   | -                             | -                                        | -                   |
| 3991134                   | +      | 0.0046               | 3                      | 0                      | XCV3486                     | 0           | -                            | -                                        | -                             | -                                        | -                   |
| 3999749                   | -      | 0.0225               | 3                      | 0                      | -                           | -           | XCV3491                      | 21/1304                                  | -                             | -                                        | -                   |
| 4001676                   | +      | 0.0155               | 3                      | 1                      | -                           | -           | -                            | -                                        | XCV3492                       | 620/1125                                 | -                   |
| 4007577                   | -      | 0.0000               | 28                     | 2                      | XCV3496                     | 0           | -                            | -                                        | -                             | -                                        | -                   |
| 4008425                   | -      | 0.0006               | 6                      | 3                      | -                           | -           | XCV3497                      | 1539/407                                 | -                             | -                                        | -                   |
| 4012132                   | -      | 0.0017               | 6                      | 0                      | XCV3500                     | 174         | XCV3501                      | 884/171                                  | -                             | -                                        | -                   |
| 4013200                   | +      | 0.0010               | 6                      | 1                      | XCV3502                     | 29          | -                            | -                                        | -                             | -                                        | -                   |
| 4018650                   | -      | 0.0000               | 242                    | 26                     | XCV3505<br>XCV3506          | 272<br>27   | -                            | -                                        | -                             | -                                        | -                   |
| 4018651                   | -      | 0.0025               | 76                     | 7                      | XCV3505<br>XCV3506          | 273<br>28   | -                            | -                                        | -                             | -                                        | -                   |
| 4019632                   | +      | 0.0011               | 8                      | 2                      | -                           | -           | -                            | -                                        | XCV3507                       | 1/934                                    | -                   |
| 4020256                   | -      | 0.0157               | 3                      | 0                      | -                           | -           | XCV3508                      | 1653/497                                 | -                             | -                                        | -                   |
| 4022331                   | -      | 0.0000               | 11                     | 1                      | XCV3509                     | 21          | -                            | -                                        | -                             | -                                        | -                   |
| 4024561                   | -      | 0.0001               | 9                      | 1                      | XCV3510                     | 0           | -                            | -                                        | -                             | -                                        | -                   |
| 4025035                   | -      | 0.0000               | 25                     | 2                      | XCV3511                     | 47          | -                            | -                                        | -                             | -                                        | -                   |
| 4026894                   | -      | 0.0018               | 7                      | 2                      | XCV3513                     | 22          | -                            | -                                        | XCV3514                       | 88/810                                   | -                   |
| 4027759                   | -      | 0.0224               | 3                      | 0                      | -                           | -           | -                            | -                                        | XCV3514<br>XCV3515            | 777/55<br>32/334                         | -                   |
| 4037253                   | +      | 0.0022               | 14                     | 7                      | XCV3525                     | 218         | XCV3524                      | 207/218                                  | -                             | -                                        | -                   |
| 4037865                   | +      | 0.0000               | 2627                   | 442                    | -                           | -           | -                            | -                                        | -                             | -                                        | +                   |
| 4037913                   | -      | 0.0000               | 36                     | 17                     | -                           | -           | -                            | -                                        | -                             | -                                        | +                   |
| 4041002                   | +      | 0.0024               | 3                      | 0                      | -                           | -           | XCV3530                      | 147/842                                  | -                             | -                                        | -                   |
| 4042199                   | +      | 0.0120               | 3                      | 0                      | -                           | -           | XCV3532                      | 28/691                                   | XCV3531                       | 5/204                                    | -                   |
| 4046356                   | +      | 0.0469               | 7                      | 0                      | -                           | -           | -                            | -                                        | XCV3534                       | 558/2621                                 | -                   |
| 4061390                   | -      | 0.0014               | 4                      | 0                      | XCV3544                     | 28          | -                            | -                                        | XCV3545                       | 45/914                                   | -                   |
| 4064047                   | -      | 0.0329               | 5                      | 0                      | -                           | -           | XCV3547                      | 69/656                                   | -                             | -                                        | -                   |
| 4064199                   | +      | 0.0071               | 5                      | 1                      | XCV3548                     | 0           | -                            | -                                        | XCV3547                       | 83/808                                   | -                   |
| 4064434                   | +      | 0.0046               | 4                      | 0                      | -                           | -           | XCV3548                      | 235/1849                                 | -                             | -                                        | -                   |
| 4068348                   | +      | 0.0000               | 18                     | 2                      | -                           | -           | -                            | -                                        | XCV3551                       | 110/483                                  | -                   |
| 4069816                   | -      | 0.0013               | 7                      | 1                      | XCV3552                     | 0           | -                            | -                                        | -                             | -                                        | -                   |
| 4069950                   | +      | 0.0000               | 35                     | 10                     | -                           | -           | -                            | -                                        | -                             | -                                        | +                   |
| 4070819                   | -      | 0.0003               | 7                      | 0                      | XCV3553                     | 78          | -                            | -                                        | XCV3554                       | 82/1335                                  | -                   |
| 4072489                   | +      | 0.0000               | 27                     | 2                      | XCV3556<br>XCV3555          | 240<br>94   | -                            | -                                        | -                             | -                                        | -                   |
| 4084692                   | -      | 0.0083               | 3                      | 0                      | -                           | -           | -                            | -                                        | XCV3566                       | 176/1173                                 | -                   |
| 4086583                   | -      | 0.0069               | 6                      | 2                      | XCV3567                     | 29          | -                            | -                                        | -                             | -                                        | -                   |
| 4089769                   | +      | 0.0000               | 44                     | 3                      | XCV3570                     | 32          | -                            | -                                        | -                             | -                                        | -                   |
| 4090439                   | +      | 0.0085               | 4                      | 1                      | XCV3571                     | 45          | -                            | -                                        | -                             | -                                        | -                   |
| 4098408                   | +      | 0.0006               | 5                      | 0                      | -                           | -           | -                            | -                                        | XCV3574                       | 31/2493                                  | -                   |
| 4100738                   | -      | 0.0000               | 25                     | 1                      | XCV3575                     | 184         | -                            | -                                        | -                             | -                                        | -                   |
| 4107864                   | -      | 0.0154               | 3                      | 0                      | XCV3578                     | 29          | -                            | -                                        | -                             | -                                        | -                   |
| 4108094                   | +      | 0.0000               | 30                     | 8                      | -                           | -           | -                            | -                                        | -                             | -                                        | +                   |
| 4109000                   | +      | 0.0025               | 4                      | 0                      | -                           | -           | XCV3579                      | 513/485                                  | -                             | -                                        | -                   |
| 4112499                   | +      | 0.0105               | 3                      | 0                      | XCV3583                     | 186         | XCV3582                      | 929/186                                  | -                             | -                                        | -                   |
| 4117962                   | -      | 0.0038               | 4                      | 0                      | XCV3586                     | 43          | -                            | -                                        | XCV3587                       | 78/959                                   | -                   |

<sup>a</sup>, TSS position on the Xcv chromosome and the plasmid (pXCV183; marked with #), respectively. <sup>b</sup>, p-value indicates the significance of the annotated TSS (see METHODS). <sup>c</sup>, number of read starts at TSS position. <sup>d</sup>, TSS classification and the corresponding CDS. <sup>e</sup>, distance of the TSS to annotated start and stop codon of the corresponding CDS. <sup>f</sup>, a TSS is classified as orphan (+) if it is neither classified as primary, internal nor antisense TSS.



| TSS position <sup>a</sup> | Strand | p-value <sup>b</sup> | Library 2 <sup>c</sup> | Library 1 <sup>c</sup> | Primary <sup>d</sup> to CDS | 5' UTR (bp) | Internal <sup>d</sup> to CDS | Distance to start/stop <sup>e</sup> (bp) | Antisense <sup>d</sup> to CDS | Distance to start/stop <sup>e</sup> (bp) | Orphan <sup>f</sup> |
|---------------------------|--------|----------------------|------------------------|------------------------|-----------------------------|-------------|------------------------------|------------------------------------------|-------------------------------|------------------------------------------|---------------------|
| 4122387                   | +      | 0.0009               | 8                      | 2                      | XCV3589                     | 0           | -                            | -                                        | -                             | -                                        | -                   |
| 4123145                   | +      | 0.0016               | 5                      | 0                      | XCV3590                     | 24          | -                            | -                                        | -                             | -                                        | -                   |
| 4130785                   | -      | 0.0035               | 9                      | 3                      | XCV3596<br>XCV3595          | 28<br>236   | -                            | -                                        | -                             | -                                        | -                   |
| 4137131                   | -      | 0.0000               | 10                     | 0                      | XCV3598                     | 28          | -                            | -                                        | -                             | -                                        | -                   |
| 4160234                   | +      | 0.0144               | 3                      | 0                      | -                           | -           | XCV3617                      | 377/2082                                 | -                             | -                                        | -                   |
| 4165173                   | -      | 0.0193               | 3                      | 0                      | XCV3619                     | 34          | -                            | -                                        | -                             | -                                        | -                   |
| 4167914                   | +      | 0.0000               | 10                     | 1                      | XCV3622                     | 24          | -                            | -                                        | -                             | -                                        | -                   |
| 4171902                   | -      | 0.0026               | 5                      | 1                      | -                           | -           | XCV3625                      | 15/773                                   | XCV3626                       | 61/984                                   | -                   |
| 4171936                   | +      | 0.0001               | 12                     | 3                      | XCV3626                     | 27          | -                            | -                                        | XCV3625                       | 19/807                                   | -                   |
| 4176511                   | +      | 0.0483               | 3                      | 0                      | -                           | -           | XCV3630                      | 293/984                                  | -                             | -                                        | -                   |
| 4183458                   | -      | 0.0153               | 5                      | 0                      | XCV3636                     | 21          | -                            | -                                        | -                             | -                                        | -                   |
| 4199423                   | -      | 0.0272               | 6                      | 0                      | XCV3647                     | 2           | -                            | -                                        | -                             | -                                        | -                   |
| 4205166                   | -      | 0.0363               | 4                      | 0                      | XCV3651                     | 104         | -                            | -                                        | -                             | -                                        | -                   |
| 4213401                   | -      | 0.0000               | 14                     | 3                      | -                           | -           | XCV3658                      | 2181/95                                  | -                             | -                                        | -                   |
| 4214082                   | -      | 0.0152               | 3                      | 1                      | -                           | -           | XCV3658                      | 1500/776                                 | -                             | -                                        | -                   |
| 4223074                   | -      | 0.0022               | 3                      | 0                      | -                           | -           | XCV3668                      | 1292/432                                 | -                             | -                                        | -                   |
| 4224385                   | -      | 0.0043               | 3                      | 0                      | XCV3668                     | 19          | -                            | -                                        | -                             | -                                        | -                   |
| 4245230                   | -      | 0.0001               | 8                      | 1                      | XCV3675                     | 24          | -                            | -                                        | -                             | -                                        | -                   |
| 4247726                   | -      | 0.0193               | 3                      | 0                      | -                           | -           | XCV3678                      | 165/131                                  | -                             | -                                        | -                   |
| 4258733                   | +      | 0.0037               | 4                      | 0                      | XCV3686                     | 283         | -                            | -                                        | XCV3685                       | 43/2833                                  | -                   |
| 4259551                   | +      | 0.0000               | 45                     | 4                      | -                           | -           | XCV3686                      | 535/1456                                 | -                             | -                                        | -                   |
| 4264986                   | -      | 0.0000               | 16                     | 5                      | XCV3690                     | 0           | -                            | -                                        | -                             | -                                        | -                   |
| 4265843                   | +      | 0.0000               | 23                     | 1                      | XCV3692                     | 21          | -                            | -                                        | -                             | -                                        | -                   |
| 4267656                   | +      | 0.0000               | 13                     | 1                      | XCV3693                     | 46          | -                            | -                                        | -                             | -                                        | -                   |
| 4269632                   | +      | 0.0001               | 7                      | 0                      | -                           | -           | XCV3695                      | 102/1124                                 | -                             | -                                        | -                   |
| 4270597                   | +      | 0.0017               | 4                      | 0                      | XCV3696                     | 248         | XCV3695                      | 1067/159                                 | -                             | -                                        | -                   |
| 4274499                   | +      | 0.0003               | 8                      | 1                      | XCV3700                     | 27          | -                            | -                                        | XCV3699                       | 89/685                                   | -                   |
| 4277595                   | -      | 0.0000               | 23                     | 6                      | XCV3702                     | 26          | -                            | -                                        | -                             | -                                        | -                   |
| 4279066                   | +      | 0.0042               | 5                      | 2                      | XCV3704                     | 31          | -                            | -                                        | -                             | -                                        | -                   |
| 4282216                   | -      | 0.0002               | 7                      | 0                      | XCV3705                     | 260         | -                            | -                                        | -                             | -                                        | -                   |
| 4283564                   | -      | 0.0041               | 3                      | 1                      | -                           | -           | XCV3707                      | 189/365                                  | -                             | -                                        | -                   |
| 4283579                   | +      | 0.0018               | 5                      | 0                      | -                           | -           | -                            | -                                        | XCV3707                       | 174/380                                  | -                   |
| 4284080                   | -      | 0.0011               | 5                      | 0                      | -                           | -           | XCV3708                      | 557/327                                  | -                             | -                                        | -                   |
| 4284757                   | -      | 0.0000               | 13                     | 2                      | XCV3708                     | 120         | XCV3709                      | 991/61                                   | -                             | -                                        | -                   |
| 4285797                   | -      | 0.0017               | 5                      | 0                      | XCV3709                     | 49          | -                            | -                                        | -                             | -                                        | -                   |
| 4287776                   | +      | 0.0000               | 20                     | 2                      | -                           | -           | -                            | -                                        | -                             | -                                        | +                   |
| 4292574                   | -      | 0.0066               | 3                      | 0                      | -                           | -           | -                            | -                                        | XCV3716                       | 871/1378                                 | -                   |
| 4293883                   | +      | 0.0001               | 7                      | 0                      | -                           | -           | XCV3716                      | 2180/69                                  | -                             | -                                        | -                   |
| 4296181                   | -      | 0.0047               | 6                      | 2                      | XCV3718                     | 82          | -                            | -                                        | -                             | -                                        | -                   |
| 4309263                   | -      | 0.0000               | 12                     | 1                      | XCV3726                     | 32          | -                            | -                                        | -                             | -                                        | -                   |
| 4309871                   | -      | 0.0055               | 9                      | 3                      | XCV3727                     | 186         | -                            | -                                        | -                             | -                                        | -                   |
| 4311306                   | +      | 0.0001               | 9                      | 2                      | XCV3730                     | 100         | -                            | -                                        | XCV3729                       | 1/379                                    | -                   |
| 4311336                   | -      | 0.0000               | 8                      | 0                      | XCV3729                     | 29          | -                            | -                                        | XCV3730                       | 70/1200                                  | -                   |
| 4314643                   | -      | 0.0000               | 12                     | 0                      | XCV3732                     | 23          | -                            | -                                        | -                             | -                                        | -                   |
| 4314757                   | +      | 0.0008               | 7                      | 2                      | XCV3733                     | 241         | -                            | -                                        | -                             | -                                        | -                   |
| 4316512                   | -      | 0.0299               | 3                      | 0                      | -                           | -           | -                            | -                                        | XCV3734                       | 10/360                                   | -                   |
| 4317032                   | +      | 0.0000               | 12                     | 2                      | -                           | -           | XCV3735                      | 82/367                                   | -                             | -                                        | -                   |
| 4318226                   | -      | 0.0018               | 5                      | 1                      | XCV3736                     | 37          | -                            | -                                        | -                             | -                                        | -                   |
| 4318420                   | +      | 0.0010               | 7                      | 1                      | XCV3737                     | 0           | -                            | -                                        | -                             | -                                        | -                   |
| 4321777                   | +      | 0.0001               | 8                      | 1                      | XCV3741                     | 33          | -                            | -                                        | -                             | -                                        | -                   |
| 4323846                   | -      | 0.0166               | 3                      | 1                      | -                           | -           | XCV3743                      | 672/32                                   | -                             | -                                        | -                   |
| 4326863                   | -      | 0.0448               | 3                      | 1                      | XCV3744                     | 182         | -                            | -                                        | -                             | -                                        | -                   |
| 4328091                   | +      | 0.0001               | 13                     | 3                      | -                           | -           | XCV3746                      | 16/439                                   | -                             | -                                        | -                   |

<sup>a</sup>, TSS position on the *Xcv* chromosome and the plasmid (pXCV183; marked with #), respectively. <sup>b</sup>, p-value indicates the significance of the annotated TSS (see METHODS). <sup>c</sup>, number of read starts at TSS position. <sup>d</sup>, TSS classification and the corresponding CDS. <sup>e</sup>, distance of the TSS to annotated start and stop codon of the corresponding CDS. <sup>f</sup>, a TSS is classified as orphan (+) if it is neither classified as primary, internal nor antisense TSS.

| TSS position <sup>a</sup> | Strand | p-value <sup>b</sup> | Library 2 <sup>c</sup> | Library 1 <sup>c</sup> | Primary <sup>d</sup> to CDS | 5' UTR (bp) | Internal <sup>d</sup> to CDS | Distance to start/stop <sup>e</sup> (bp) | Antisense <sup>d</sup> to CDS | Distance to start/stop <sup>e</sup> (bp) | Orphan <sup>f</sup> |
|---------------------------|--------|----------------------|------------------------|------------------------|-----------------------------|-------------|------------------------------|------------------------------------------|-------------------------------|------------------------------------------|---------------------|
| 4339048                   | +      | 0.0200               | 4                      | 0                      | -                           | -           | -                            | -                                        | XCV3754                       | 365/1461                                 | -                   |
| 4339435                   | -      | 0.0006               | 9                      | 3                      | XCV3754                     | 22          | -                            | -                                        | -                             | -                                        | -                   |
| 4349332                   | -      | 0.0151               | 3                      | 0                      | XCV3762                     | 23          | -                            | -                                        | XCV3763                       | 92/502                                   | -                   |
| 4350995                   | -      | 0.0003               | 6                      | 0                      | XCV3765                     | 72          | -                            | -                                        | -                             | -                                        | -                   |
| 4358104                   | -      | 0.0422               | 3                      | 1                      | -                           | -           | XCV3773                      | 121/676                                  | -                             | -                                        | -                   |
| 4358669                   | -      | 0.0000               | 13                     | 2                      | XCV3774                     | 86          | -                            | -                                        | -                             | -                                        | -                   |
| 4364685                   | -      | 0.0000               | 45                     | 0                      | XCV3779                     | 31          | -                            | -                                        | -                             | -                                        | -                   |
| 4366433                   | +      | 0.0296               | 3                      | 0                      | XCV3782                     | 40          | -                            | -                                        | -                             | -                                        | -                   |
| 4367233                   | -      | 0.0359               | 11                     | 0                      | -                           | -           | -                            | -                                        | XCV3782<br>XCV3783            | 760/77<br>89/694                         | -                   |
| 4367263                   | +      | 0.0001               | 6                      | 0                      | XCV3783                     | 59          | -                            | -                                        | -                             | -                                        | -                   |
| 4367880                   | -      | 0.0082               | 8                      | 1                      | -                           | -           | -                            | -                                        | XCV3783                       | 558/47                                   | -                   |
| 4369125                   | -      | 0.0193               | 3                      | 0                      | XCV3784                     | 23          | -                            | -                                        | -                             | -                                        | -                   |
| 4369290                   | +      | 0.0000               | 12                     | 2                      | -                           | -           | -                            | -                                        | -                             | -                                        | +                   |
| 4371772                   | -      | 0.0000               | 68                     | 5                      | -                           | -           | -                            | -                                        | -                             | -                                        | +                   |
| 4376389                   | -      | 0.0017               | 4                      | 0                      | XCV3789                     | 20          | -                            | -                                        | -                             | -                                        | -                   |
| 4377581                   | +      | 0.0009               | 11                     | 3                      | XCV3791                     | 25          | -                            | -                                        | XCV3790                       | 83/976                                   | -                   |
| 4385950                   | +      | 0.0030               | 4                      | 0                      | -                           | -           | -                            | -                                        | XCV3800                       | 30/1145                                  | -                   |
| 4386005                   | -      | 0.0017               | 5                      | 0                      | XCV3800                     | 25          | -                            | -                                        | -                             | -                                        | -                   |
| 4386948                   | -      | 0.0021               | 4                      | 0                      | -                           | -           | -                            | -                                        | XCV3801                       | 10/270                                   | -                   |
| 4388305                   | -      | 0.0077               | 4                      | 0                      | -                           | -           | XCV3802                      | 292/1042                                 | -                             | -                                        | -                   |
| 4392400                   | +      | 0.0000               | 11                     | 1                      | XCV3807                     | 41          | -                            | -                                        | XCV3806                       | 13/652                                   | -                   |
| 4393809                   | -      | 0.0194               | 4                      | 2                      | -                           | -           | XCV3808                      | 538/556                                  | -                             | -                                        | -                   |
| 4394950                   | -      | 0.0017               | 4                      | 0                      | -                           | -           | XCV3809                      | 686/600                                  | -                             | -                                        | -                   |
| 4395515                   | -      | 0.0030               | 4                      | 0                      | -                           | -           | XCV3809                      | 121/1165                                 | -                             | -                                        | -                   |
| 4398395                   | +      | 0.0001               | 8                      | 0                      | XCV3814                     | 26          | -                            | -                                        | -                             | -                                        | -                   |
| 4400663                   | +      | 0.0000               | 23                     | 2                      | -                           | -           | XCV3816                      | 151/604                                  | -                             | -                                        | -                   |
| 4402676                   | +      | 0.0018               | 9                      | 3                      | -                           | -           | XCV3820                      | 49/301                                   | -                             | -                                        | -                   |
| 4403069                   | +      | 0.0130               | 3                      | 0                      | -                           | -           | -                            | -                                        | -                             | -                                        | +                   |
| 4407078                   | -      | 0.0020               | 3                      | 0                      | XCV3823                     | 68          | -                            | -                                        | -                             | -                                        | -                   |
| 4409801                   | -      | 0.0009               | 4                      | 0                      | -                           | -           | XCV3825                      | 422/1011                                 | -                             | -                                        | -                   |
| 4411740                   | -      | 0.0008               | 7                      | 1                      | XCV3826                     | 0           | -                            | -                                        | -                             | -                                        | -                   |
| 4413048                   | -      | 0.0400               | 4                      | 0                      | XCV3827                     | 252         | -                            | -                                        | XCV3828                       | 85/978                                   | -                   |
| 4420847                   | +      | 0.0009               | 5                      | 0                      | XCV3836                     | 104         | -                            | -                                        | -                             | -                                        | -                   |
| 4423078                   | -      | 0.0000               | 12                     | 0                      | -                           | -           | XCV3837                      | 245/1347                                 | -                             | -                                        | -                   |
| 4423362                   | -      | 0.0192               | 6                      | 1                      | XCV3837                     | 39          | -                            | -                                        | -                             | -                                        | -                   |
| 4454565                   | +      | 0.0000               | 13                     | 1                      | XCV3871                     | 226         | -                            | -                                        | -                             | -                                        | -                   |
| 4480327                   | -      | 0.0021               | 6                      | 0                      | XCV3894                     | 262         | XCV3895                      | 199/232                                  | -                             | -                                        | -                   |
| 4485330                   | -      | 0.0000               | 11                     | 0                      | XCV3903                     | 218         | -                            | -                                        | -                             | -                                        | -                   |
| 4488575                   | +      | 0.0019               | 3                      | 0                      | -                           | -           | -                            | -                                        | -                             | -                                        | +                   |
| 4492811                   | -      | 0.0000               | 41                     | 3                      | XCV3912                     | 37          | -                            | -                                        | -                             | -                                        | -                   |
| 4492830                   | +      | 0.0125               | 3                      | 0                      | -                           | -           | -                            | -                                        | XCV3913<br>XCV3912            | 493/56<br>56/1930                        | -                   |
| 4493424                   | +      | 0.0109               | 4                      | 1                      | -                           | -           | XCV3914                      | 102/911                                  | -                             | -                                        | -                   |
| 4498709                   | -      | 0.0005               | 7                      | 0                      | XCV3919                     | 22          | -                            | -                                        | -                             | -                                        | -                   |
| 4498825                   | +      | 0.0000               | 16                     | 0                      | -                           | -           | -                            | -                                        | -                             | -                                        | +                   |
| 4499967                   | +      | 0.0085               | 3                      | 0                      | XCV3921                     | 43          | -                            | -                                        | XCV3920                       | 39/1013                                  | -                   |
| 4500051                   | -      | 0.0006               | 6                      | 1                      | XCV3920                     | 45          | -                            | -                                        | XCV3921                       | 41/780                                   | -                   |
| 4507411                   | -      | 0.0004               | 7                      | 1                      | XCV3926                     | 42          | -                            | -                                        | XCV3927                       | 90/1223                                  | -                   |
| 4507470                   | +      | 0.0000               | 19                     | 5                      | XCV3927                     | 31          | -                            | -                                        | -                             | -                                        | -                   |
| 4509798                   | +      | 0.0000               | 54                     | 10                     | XCV3929                     | 99          | XCV3928                      | 1089/53                                  | -                             | -                                        | -                   |
| 4515928                   | +      | 0.0000               | 10                     | 1                      | -                           | -           | XCV3934                      | 156/773                                  | -                             | -                                        | -                   |
| 4518620                   | -      | 0.0000               | 168                    | 23                     | XCV3936                     | 297         | -                            | -                                        | XCV3937                       | 38/250                                   | -                   |
| 4521105                   | -      | 0.0000               | 18                     | 0                      | XCV3938                     | 37          | -                            | -                                        | -                             | -                                        | -                   |

<sup>a</sup>, TSS position on the *Xcv* chromosome and the plasmid (pXCV183; marked with #), respectively. <sup>b</sup>, p-value indicates the significance of the annotated TSS (see METHODS). <sup>c</sup>, number of read starts at TSS position. <sup>d</sup>, TSS classification and the corresponding CDS. <sup>e</sup>, distance of the TSS to annotated start and stop codon of the corresponding CDS. <sup>f</sup>, a TSS is classified as orphan (+) if it is neither classified as primary, internal nor antisense TSS.

| TSS position <sup>a</sup> | Strand | p-value <sup>b</sup> | Library 2 <sup>c</sup> | Library 1 <sup>c</sup> | Primary <sup>d</sup> to CDS | 5' UTR (bp) | Internal <sup>d</sup> to CDS | Distance to start/stop <sup>e</sup> (bp) | Antisense <sup>d</sup> to CDS | Distance to start/stop <sup>e</sup> (bp) | Orphan <sup>f</sup> |
|---------------------------|--------|----------------------|------------------------|------------------------|-----------------------------|-------------|------------------------------|------------------------------------------|-------------------------------|------------------------------------------|---------------------|
| 4522609                   | +      | 0.0016               | 6                      | 0                      | XCV3940                     | 114         | -                            | -                                        | XCV3939                       | 80/1453                                  | -                   |
| 4526218                   | +      | 0.0424               | 4                      | 0                      | XCV3943                     | 0           | -                            | -                                        | -                             | -                                        | -                   |
| 4533862                   | -      | 0.0000               | 86                     | 11                     | -                           | -           | XCV3949                      | 9/872                                    | -                             | -                                        | -                   |
| 4537266                   | -      | 0.0001               | 8                      | 0                      | XCV3953                     | 0           | -                            | -                                        | -                             | -                                        | -                   |
| 4539141                   | +      | 0.0000               | 16                     | 2                      | XCV3955                     | 121         | -                            | -                                        | XCV3954                       | 78/1796                                  | -                   |
| 4539754                   | -      | 0.0167               | 4                      | 0                      | -                           | -           | -                            | -                                        | -                             | -                                        | +                   |
| 4542837                   | -      | 0.0000               | 25                     | 4                      | XCV3957                     | 22          | -                            | -                                        | -                             | -                                        | -                   |
| 4548120                   | -      | 0.0002               | 8                      | 0                      | -                           | -           | XCV3960                      | 101/2127                                 | -                             | -                                        | -                   |
| 4550453                   | -      | 0.0002               | 7                      | 1                      | XCV3963                     | 0           | -                            | -                                        | -                             | -                                        | -                   |
| 4551938                   | -      | 0.0012               | 6                      | 1                      | XCV3964                     | 21          | -                            | -                                        | -                             | -                                        | -                   |
| 4562352                   | -      | 0.0000               | 10                     | 0                      | -                           | -           | XCV3969                      | 75/596                                   | -                             | -                                        | -                   |
| 4562806                   | +      | 0.0469               | 7                      | 0                      | -                           | -           | -                            | -                                        | XCV3970                       | 425/138                                  | -                   |
| 4563705                   | +      | 0.0177               | 3                      | 1                      | -                           | -           | -                            | -                                        | XCV3971                       | 422/327                                  | -                   |
| 4564127                   | -      | 0.0008               | 4                      | 0                      | XCV3971                     | 0           | -                            | -                                        | -                             | -                                        | -                   |
| 4566249                   | -      | 0.0006               | 6                      | 0                      | XCV3976                     | 71          | -                            | -                                        | -                             | -                                        | -                   |
| 4578759                   | -      | 0.0060               | 3                      | 0                      | XCV3988                     | 27          | -                            | -                                        | -                             | -                                        | -                   |
| 4580486                   | -      | 0.0047               | 3                      | 0                      | XCV3990                     | 23          | -                            | -                                        | -                             | -                                        | -                   |
| 4580654                   | +      | 0.0015               | 22                     | 14                     | XCV3991                     | 88          | -                            | -                                        | -                             | -                                        | -                   |
| 4583277                   | +      | 0.0041               | 6                      | 2                      | XCV3994                     | 0           | -                            | -                                        | -                             | -                                        | -                   |
| 4585144                   | +      | 0.0165               | 3                      | 0                      | -                           | -           | XCV3995                      | 114/1034                                 | -                             | -                                        | -                   |
| 4587148                   | +      | 0.0089               | 4                      | 1                      | -                           | -           | XCV3996                      | 796/781                                  | -                             | -                                        | -                   |
| 4589368                   | -      | 0.0000               | 8                      | 0                      | -                           | -           | XCV3998                      | 862/298                                  | -                             | -                                        | -                   |
| 4590816                   | -      | 0.0271               | 9                      | 5                      | XCV3999                     | 0           | -                            | -                                        | -                             | -                                        | -                   |
| 4596722                   | -      | 0.0000               | 22                     | 4                      | -                           | -           | XCV4007                      | 147/500                                  | -                             | -                                        | -                   |
| 4596940                   | +      | 0.0002               | 14                     | 5                      | XCV4008                     | 21          | -                            | -                                        | XCV4007                       | 71/718                                   | -                   |
| 4606228                   | +      | 0.0261               | 5                      | 0                      | -                           | -           | -                            | -                                        | -                             | -                                        | +                   |
| 4606630                   | -      | 0.0003               | 7                      | 1                      | -                           | -           | -                            | -                                        | -                             | -                                        | +                   |
| 4608071                   | -      | 0.0000               | 11                     | 2                      | XCV4010                     | 33          | -                            | -                                        | -                             | -                                        | -                   |
| 4608171                   | +      | 0.0000               | 21                     | 4                      | XCV4011                     | 38          | -                            | -                                        | -                             | -                                        | -                   |
| 4615446                   | +      | 0.0000               | 12                     | 0                      | XCV4018                     | 30          | -                            | -                                        | -                             | -                                        | -                   |
| 4626132                   | +      | 0.0272               | 3                      | 1                      | XCV4029                     | 1           | -                            | -                                        | -                             | -                                        | -                   |
| 4627723                   | +      | 0.0051               | 9                      | 4                      | XCV4030                     | 299         | XCV4029                      | 1590/116                                 | -                             | -                                        | -                   |
| 4628082                   | +      | 0.0415               | 5                      | 2                      | -                           | -           | XCV4030                      | 60/821                                   | -                             | -                                        | -                   |
| 4634680                   | +      | 0.0206               | 3                      | 0                      | -                           | -           | -                            | -                                        | XCV4035                       | 178/1606                                 | -                   |
| 4636053                   | +      | 0.0000               | 17                     | 3                      | -                           | -           | -                            | -                                        | XCV4036                       | 1018/1186                                | -                   |
| 4641920                   | -      | 0.0001               | 8                      | 0                      | XCV4040                     | 31          | -                            | -                                        | -                             | -                                        | -                   |
| 4646308                   | -      | 0.0070               | 4                      | 1                      | XCV4043                     | 27          | -                            | -                                        | -                             | -                                        | -                   |
| 4647214                   | +      | 0.0010               | 6                      | 0                      | XCV4046                     | 73          | -                            | -                                        | -                             | -                                        | -                   |
| 4649419                   | +      | 0.0057               | 3                      | 0                      | -                           | -           | XCV4048                      | 26/528                                   | -                             | -                                        | -                   |
| 4652571                   | -      | 0.0001               | 4                      | 0                      | -                           | -           | XCV4052                      | 907/211                                  | -                             | -                                        | -                   |
| 4654564                   | -      | 0.0343               | 9                      | 6                      | -                           | -           | XCV4053                      | 18/1073                                  | XCV4054                       | 93/737                                   | -                   |
| 4654612                   | +      | 0.0110               | 3                      | 0                      | XCV4054                     | 45          | -                            | -                                        | XCV4053                       | 30/1121                                  | -                   |
| 4664567                   | +      | 0.0141               | 3                      | 0                      | XCV4067                     | 173         | -                            | -                                        | -                             | -                                        | -                   |
| 4665917                   | +      | 0.0024               | 3                      | 0                      | -                           | -           | XCV4068                      | 143/519                                  | -                             | -                                        | -                   |
| 4670222                   | -      | 0.0002               | 6                      | 0                      | XCV4073                     | 78          | -                            | -                                        | -                             | -                                        | -                   |
| 4674977                   | +      | 0.0001               | 13                     | 3                      | XCV4079                     | 0           | -                            | -                                        | -                             | -                                        | -                   |
| 4676672                   | +      | 0.0078               | 3                      | 0                      | -                           | -           | XCV4080                      | 916/451                                  | -                             | -                                        | -                   |
| 4691793                   | -      | 0.0012               | 4                      | 0                      | XCV4094                     | 27          | -                            | -                                        | XCV4095                       | 20/523                                   | -                   |
| 4694340                   | -      | 0.0000               | 28                     | 4                      | XCV4096                     | 32          | -                            | -                                        | -                             | -                                        | -                   |
| 4694851                   | +      | 0.0043               | 3                      | 0                      | -                           | -           | -                            | -                                        | XCV4097                       | 880/139                                  | -                   |
| 4697095                   | -      | 0.0028               | 3                      | 0                      | XCV4098                     | 24          | -                            | -                                        | -                             | -                                        | -                   |
| 4698077                   | -      | 0.0000               | 105                    | 8                      | XCV4100<br>XCV4101          | 268<br>41   | -                            | -                                        | -                             | -                                        | -                   |
| 4699089                   | -      | 0.0000               | 14                     | 1                      | XCV4102                     | 23          | -                            | -                                        | -                             | -                                        | -                   |

<sup>a</sup>, TSS position on the *Xcv* chromosome and the plasmid (pXCV183; marked with #), respectively. <sup>b</sup>, p-value indicates the significance of the annotated TSS (see METHODS). <sup>c</sup>, number of read starts at TSS position. <sup>d</sup>, TSS classification and the corresponding CDS. <sup>e</sup>, distance of the TSS to annotated start and stop codon of the corresponding CDS. <sup>f</sup>, a TSS is classified as orphan (+) if it is neither classified as primary, internal nor antisense TSS.

| TSS position <sup>a</sup> | Strand | p-value <sup>b</sup> | Library 2 <sup>c</sup> | Library 1 <sup>c</sup> | Primary <sup>d</sup> to CDS | 5' UTR (bp) | Internal <sup>d</sup> to CDS | Distance to start/stop <sup>e</sup> (bp) | Antisense <sup>d</sup> to CDS | Distance to start/stop <sup>e</sup> (bp) | Orphan <sup>f</sup> |
|---------------------------|--------|----------------------|------------------------|------------------------|-----------------------------|-------------|------------------------------|------------------------------------------|-------------------------------|------------------------------------------|---------------------|
| 4701994                   | -      | 0.0000               | 23                     | 7                      | -                           | -           | -                            | -                                        | XCV4106                       | 81/257                                   | -                   |
| 4706354                   | +      | 0.0070               | 4                      | 1                      | -                           | -           | XCV4111                      | 10/301                                   | -                             | -                                        | -                   |
| 4711085                   | +      | 0.0206               | 3                      | 0                      | -                           | -           | -                            | -                                        | XCV4115                       | 902/510                                  | -                   |
| 4714461                   | -      | 0.0015               | 4                      | 0                      | XCV4118                     | 44          | -                            | -                                        | -                             | -                                        | -                   |
| 4715131                   | -      | 0.0000               | 43                     | 10                     | XCV4119                     | 29          | -                            | -                                        | XCV4120                       | 31/573                                   | -                   |
| 4720514                   | -      | 0.0088               | 4                      | 0                      | XCV4123                     | 1           | -                            | -                                        | -                             | -                                        | -                   |
| 4727508                   | -      | 0.0162               | 4                      | 1                      | -                           | -           | -                            | -                                        | -                             | -                                        | +                   |
| 4728553                   | -      | 0.0000               | 15                     | 1                      | XCV4131                     | 20          | -                            | -                                        | -                             | -                                        | -                   |
| 4729028                   | -      | 0.0051               | 6                      | 2                      | XCV4132                     | 22          | -                            | -                                        | -                             | -                                        | -                   |
| 4731606                   | -      | 0.0104               | 3                      | 0                      | -                           | -           | XCV4134                      | 17/1809                                  | -                             | -                                        | -                   |
| 4735763                   | -      | 0.0011               | 7                      | 2                      | XCV4137                     | 177         | -                            | -                                        | -                             | -                                        | -                   |
| 4735903                   | +      | 0.0000               | 23                     | 2                      | XCV4138                     | 67          | -                            | -                                        | -                             | -                                        | -                   |
| 4736549                   | +      | 0.0008               | 6                      | 0                      | -                           | -           | XCV4138                      | 579/2432                                 | -                             | -                                        | -                   |
| 4737286                   | +      | 0.0422               | 3                      | 0                      | -                           | -           | XCV4138                      | 1316/1695                                | -                             | -                                        | -                   |
| 4738388                   | +      | 0.0401               | 5                      | 4                      | -                           | -           | XCV4138                      | 2418/593                                 | -                             | -                                        | -                   |
| 4738712                   | +      | 0.0402               | 4                      | 0                      | -                           | -           | XCV4138                      | 2742/269                                 | -                             | -                                        | -                   |
| 4740424                   | +      | 0.0070               | 3                      | 0                      | -                           | -           | XCV4140                      | 560/450                                  | -                             | -                                        | -                   |
| 4748322                   | -      | 0.0132               | 5                      | 1                      | XCV4147                     | 160         | -                            | -                                        | -                             | -                                        | -                   |
| 4748727                   | -      | 0.0177               | 3                      | 0                      | -                           | -           | -                            | -                                        | XCV4148                       | 153/317                                  | -                   |
| 4751394                   | -      | 0.0007               | 4                      | 0                      | -                           | -           | XCV4151                      | 23/801                                   | XCV4152                       | 60/1052                                  | -                   |
| 4751412                   | +      | 0.0006               | 7                      | 1                      | XCV4152                     | 42          | -                            | -                                        | XCV4151                       | 5/819                                    | -                   |
| 4757260                   | +      | 0.0000               | 21                     | 2                      | -                           | -           | -                            | -                                        | -                             | -                                        | +                   |
| 4757357                   | -      | 0.0000               | 12                     | 3                      | -                           | -           | -                            | -                                        | -                             | -                                        | +                   |
| 4761503                   | -      | 0.0156               | 4                      | 1                      | -                           | -           | -                            | -                                        | -                             | -                                        | +                   |
| 4768772                   | +      | 0.0000               | 14                     | 1                      | XCV4166                     | 17          | -                            | -                                        | -                             | -                                        | -                   |
| 4775972                   | -      | 0.0100               | 3                      | 0                      | -                           | -           | XCV4167                      | 36/4274                                  | -                             | -                                        | -                   |
| 4776441                   | -      | 0.0000               | 37                     | 12                     | -                           | -           | -                            | -                                        | -                             | -                                        | +                   |
| 4784392                   | -      | 0.0001               | 13                     | 3                      | XCV4170<br>XCV4171          | 287<br>34   | -                            | -                                        | -                             | -                                        | -                   |
| 4788659                   | -      | 0.0193               | 3                      | 1                      | -                           | -           | -                            | -                                        | XCV4175                       | 1294/325                                 | -                   |
| 4793007                   | -      | 0.0025               | 3                      | 0                      | -                           | -           | XCV4181                      | 2017/346                                 | -                             | -                                        | -                   |
| 4796313                   | +      | 0.0079               | 3                      | 0                      | -                           | -           | -                            | -                                        | XCV4184<br>XCV4185            | 69/713<br>829/142                        | -                   |
| 4798298                   | -      | 0.0023               | 7                      | 2                      | XCV4187                     | 111         | XCV4188                      | 689/54                                   | -                             | -                                        | -                   |
| 4799322                   | -      | 0.0160               | 3                      | 0                      | XCV4189                     | 13          | -                            | -                                        | -                             | -                                        | -                   |
| 4804093                   | +      | 0.0039               | 3                      | 0                      | XCV4194                     | 26          | -                            | -                                        | -                             | -                                        | -                   |
| 4808258                   | -      | 0.0073               | 5                      | 1                      | -                           | -           | -                            | -                                        | XCV4197                       | 626/36                                   | -                   |
| 4808628                   | +      | 0.0000               | 17                     | 1                      | XCV4198                     | 0           | -                            | -                                        | -                             | -                                        | -                   |
| 4813172                   | -      | 0.0110               | 6                      | 3                      | XCV4200                     | 0           | -                            | -                                        | XCV4201                       | 77/364                                   | -                   |
| 4857728                   | -      | 0.0087               | 3                      | 0                      | XCV4227                     | 23          | -                            | -                                        | -                             | -                                        | -                   |
| 4863179                   | +      | 0.0000               | 19                     | 2                      | -                           | -           | XCV4235                      | 817/13                                   | -                             | -                                        | -                   |
| 4882281                   | -      | 0.0001               | 7                      | 0                      | -                           | -           | XCV4251                      | 86/1434                                  | -                             | -                                        | -                   |
| 4887536                   | -      | 0.0000               | 15                     | 2                      | XCV4257                     | 162         | -                            | -                                        | -                             | -                                        | -                   |
| 4891644                   | +      | 0.0008               | 8                      | 2                      | -                           | -           | -                            | -                                        | -                             | -                                        | +                   |
| 4895203                   | -      | 0.0000               | 14                     | 2                      | XCV4262                     | 0           | -                            | -                                        | -                             | -                                        | -                   |
| 4898418                   | -      | 0.0007               | 8                      | 2                      | XCV4264                     | 0           | -                            | -                                        | -                             | -                                        | -                   |
| 4902712                   | +      | 0.0151               | 3                      | 0                      | XCV4268                     | 41          | -                            | -                                        | XCV4267                       | 53/679                                   | -                   |
| 4904300                   | -      | 0.0041               | 5                      | 1                      | XCV4270                     | 9           | -                            | -                                        | -                             | -                                        | -                   |
| 4906974                   | +      | 0.0031               | 4                      | 0                      | -                           | -           | -                            | -                                        | XCV4273                       | 40/274                                   | -                   |
| 4913268                   | +      | 0.0000               | 10                     | 1                      | XCV4279                     | 23          | -                            | -                                        | -                             | -                                        | -                   |
| 4914278                   | -      | 0.0017               | 6                      | 1                      | -                           | -           | -                            | -                                        | -                             | -                                        | +                   |
| 4923729                   | -      | 0.0000               | 10                     | 0                      | XCV4289                     | 42          | -                            | -                                        | -                             | -                                        | -                   |
| 4946992                   | -      | 0.0000               | 9                      | 0                      | XCV4306                     | 0           | -                            | -                                        | -                             | -                                        | -                   |
| 4955269                   | -      | 0.0002               | 7                      | 1                      | XCV4311                     | 25          | -                            | -                                        | XCV4312                       | 65/1876                                  | -                   |

<sup>a</sup>, TSS position on the *Xcv* chromosome and the plasmid (pXCV183; marked with #), respectively. <sup>b</sup>, p-value indicates the significance of the annotated TSS (see METHODS). <sup>c</sup>, number of read starts at TSS position. <sup>d</sup>, TSS classification and the corresponding CDS. <sup>e</sup>, distance of the TSS to annotated start and stop codon of the corresponding CDS. <sup>f</sup>, a TSS is classified as orphan (+) if it is neither classified as primary, internal nor antisense TSS.

| TSS position <sup>a</sup> | Strand | p-value <sup>b</sup> | Library 2 <sup>c</sup> | Library 1 <sup>c</sup> | Primary <sup>d</sup> to CDS | 5' UTR (bp) | Internal <sup>d</sup> to CDS | Distance to start/stop <sup>e</sup> (bp) | Antisense <sup>d</sup> to CDS | Distance to start/stop <sup>e</sup> (bp) | Orphan <sup>f</sup> |
|---------------------------|--------|----------------------|------------------------|------------------------|-----------------------------|-------------|------------------------------|------------------------------------------|-------------------------------|------------------------------------------|---------------------|
| 4966194                   | -      | 0.0004               | 8                      | 2                      | -                           | -           | XCV4315                      | 42/1799                                  | -                             | -                                        | -                   |
| 4968288                   | -      | 0.0126               | 3                      | 0                      | -                           | -           | -                            | -                                        | XCV4318                       | 845/84                                   | -                   |
| 4970190                   | -      | 0.0000               | 21                     | 2                      | XCV4320<br>XCV4321          | 270<br>27   | -                            | -                                        | -                             | -                                        | -                   |
| 4971181                   | -      | 0.0000               | 20                     | 0                      | XCV4322                     | 37          | -                            | -                                        | -                             | -                                        | -                   |
| 4971307                   | +      | 0.0006               | 6                      | 1                      | -                           | -           | XCV4323                      | 9/953                                    | -                             | -                                        | -                   |
| 4973545                   | -      | 0.0041               | 4                      | 0                      | -                           | -           | -                            | -                                        | -                             | -                                        | +                   |
| 4980145                   | -      | 0.0129               | 5                      | 0                      | XCV4332                     | 86          | -                            | -                                        | XCV4333                       | 50/2283                                  | -                   |
| 4994114                   | -      | 0.0156               | 3                      | 0                      | XCV4342                     | 22          | -                            | -                                        | -                             | -                                        | -                   |
| 4994366                   | +      | 0.0134               | 3                      | 0                      | XCV4343                     | 22          | -                            | -                                        | -                             | -                                        | -                   |
| 5006692                   | -      | 0.0001               | 6                      | 0                      | XCV4353                     | 22          | -                            | -                                        | -                             | -                                        | -                   |
| 5010792                   | +      | 0.0013               | 13                     | 0                      | -                           | -           | -                            | -                                        | XCV4356                       | 93/2675                                  | -                   |
| 5012026                   | +      | 0.0135               | 5                      | 0                      | -                           | -           | -                            | -                                        | XCV4357                       | 362/1053                                 | -                   |
| 5019614                   | +      | 0.0206               | 3                      | 0                      | XCV4363                     | 39          | -                            | -                                        | -                             | -                                        | -                   |
| 5024943                   | +      | 0.0000               | 9                      | 0                      | -                           | -           | XCV4369                      | 15/200                                   | -                             | -                                        | -                   |
| 5031007                   | +      | 0.0000               | 17                     | 4                      | XCV4373                     | 137         | -                            | -                                        | -                             | -                                        | -                   |
| 5032259                   | +      | 0.0000               | 24                     | 1                      | XCV4374                     | 105         | -                            | -                                        | -                             | -                                        | -                   |
| 5036212                   | -      | 0.0257               | 3                      | 0                      | -                           | -           | -                            | -                                        | XCV4375                       | 493/637                                  | -                   |
| 5042497                   | -      | 0.0288               | 3                      | 1                      | -                           | -           | XCV4379                      | 311/978                                  | -                             | -                                        | -                   |
| 5045604                   | -      | 0.0003               | 5                      | 0                      | XCV4382                     | 48          | -                            | -                                        | -                             | -                                        | -                   |
| 5047832                   | +      | 0.0013               | 11                     | 4                      | XCV4384                     | 0           | -                            | -                                        | -                             | -                                        | -                   |
| 5047838                   | -      | 0.0096               | 3                      | 0                      | XCV4383                     | 212         | -                            | -                                        | XCV4384                       | 6/620                                    | -                   |
| 5051823                   | -      | 0.0000               | 15                     | 0                      | -                           | -           | XCV4387                      | 28/1621                                  | -                             | -                                        | -                   |
| 5060407                   | +      | 0.0261               | 5                      | 0                      | -                           | -           | -                            | -                                        | -                             | -                                        | +                   |
| 5060810                   | -      | 0.0086               | 5                      | 1                      | -                           | -           | -                            | -                                        | -                             | -                                        | +                   |
| 5068657                   | -      | 0.0001               | 8                      | 0                      | XCV4395                     | 63          | -                            | -                                        | -                             | -                                        | -                   |
| 5070952                   | -      | 0.0002               | 6                      | 0                      | -                           | -           | XCV4399                      | 3606/446                                 | -                             | -                                        | -                   |
| 5084851                   | -      | 0.0027               | 3                      | 0                      | XCV4408                     | 27          | -                            | -                                        | -                             | -                                        | -                   |
| 5086838                   | +      | 0.0032               | 3                      | 0                      | -                           | -           | XCV4411                      | 726/1118                                 | -                             | -                                        | -                   |
| 5087567                   | -      | 0.0028               | 3                      | 0                      | -                           | -           | -                            | -                                        | XCV4411                       | 1455/389                                 | -                   |
| 5088118                   | +      | 0.0132               | 4                      | 0                      | XCV4412                     | 38          | -                            | -                                        | -                             | -                                        | -                   |
| 5094547                   | -      | 0.0008               | 6                      | 0                      | -                           | -           | -                            | -                                        | -                             | -                                        | +                   |
| 5102472                   | +      | 0.0003               | 4                      | 0                      | -                           | -           | XCV4425                      | 136/127                                  | -                             | -                                        | -                   |
| 5103051                   | +      | 0.0028               | 3                      | 0                      | XCV4426                     | 18          | -                            | -                                        | -                             | -                                        | -                   |
| 5105859                   | +      | 0.0000               | 10                     | 1                      | -                           | -           | -                            | -                                        | XCV4430                       | 391/94                                   | -                   |
| 5106753                   | -      | 0.0061               | 4                      | 1                      | -                           | -           | XCV4431                      | 457/16                                   | -                             | -                                        | -                   |
| 5108588                   | +      | 0.0068               | 4                      | 0                      | XCV4434                     | 28          | -                            | -                                        | XCV4433                       | 4/625                                    | -                   |
| 5110351                   | -      | 0.0466               | 4                      | 0                      | -                           | -           | XCV4435                      | 195/626                                  | -                             | -                                        | -                   |
| 5110576                   | -      | 0.0061               | 5                      | 0                      | XCV4435                     | 30          | -                            | -                                        | -                             | -                                        | -                   |
| 5110677                   | +      | 0.0008               | 4                      | 0                      | XCV4436                     | 130         | -                            | -                                        | -                             | -                                        | -                   |
| 5116206                   | -      | 0.0185               | 11                     | 0                      | XCV4440                     | 222         | XCV4441                      | 2272/100                                 | -                             | -                                        | -                   |
| 5126147                   | -      | 0.0050               | 4                      | 1                      | -                           | -           | XCV4443                      | 137/3414                                 | -                             | -                                        | -                   |
| 5131412                   | -      | 0.0017               | 7                      | 0                      | XCV4444                     | 107         | -                            | -                                        | -                             | -                                        | -                   |
| 5134201                   | -      | 0.0000               | 10                     | 1                      | XCV4449                     | 25          | -                            | -                                        | -                             | -                                        | -                   |
| 5134535                   | +      | 0.0000               | 17                     | 5                      | XCV4450                     | 24          | -                            | -                                        | -                             | -                                        | -                   |
| 5139920                   | -      | 0.0007               | 5                      | 0                      | XCV4457                     | 21          | -                            | -                                        | -                             | -                                        | -                   |
| 5142226                   | -      | 0.0414               | 10                     | 0                      | XCV4459                     | 138         | -                            | -                                        | -                             | -                                        | -                   |
| 5146436                   | +      | 0.0002               | 6                      | 0                      | XCV4466                     | 26          | -                            | -                                        | -                             | -                                        | -                   |
| 5153717                   | -      | 0.0193               | 3                      | 0                      | XCV4468                     | 112         | -                            | -                                        | -                             | -                                        | -                   |
| 5154683                   | -      | 0.0047               | 3                      | 0                      | XCV4469                     | 22          | -                            | -                                        | -                             | -                                        | -                   |
| 5156544                   | -      | 0.0002               | 8                      | 0                      | -                           | -           | XCV4470                      | 25/1768                                  | -                             | -                                        | -                   |
| 5164171                   | -      | 0.0166               | 3                      | 1                      | XCV4476                     | 0           | -                            | -                                        | -                             | -                                        | -                   |
| 5164230                   | +      | 0.0072               | 3                      | 0                      | XCV4477                     | 206         | -                            | -                                        | XCV4476                       | 59/1222                                  | -                   |
| 5165820                   | +      | 0.0130               | 4                      | 1                      | XCV4478                     | 0           | -                            | -                                        | -                             | -                                        | -                   |

<sup>a</sup>, TSS position on the *Xcv* chromosome and the plasmid (pXCV183; marked with #), respectively. <sup>b</sup>, p-value indicates the significance of the annotated TSS (see METHODS). <sup>c</sup>, number of read starts at TSS position. <sup>d</sup>, TSS classification and the corresponding CDS. <sup>e</sup>, distance of the TSS to annotated start and stop codon of the corresponding CDS. <sup>f</sup>, a TSS is classified as orphan (+) if it is neither classified as primary, internal nor antisense TSS.

| TSS position <sup>a</sup> | Strand | p-value <sup>b</sup> | Library 2 <sup>c</sup> | Library 1 <sup>c</sup> | Primary <sup>d</sup> to CDS | 5' UTR (bp) | Internal <sup>d</sup> to CDS | Distance to start/stop <sup>e</sup> (bp) | Antisense <sup>d</sup> to CDS | Distance to start/stop <sup>e</sup> (bp) | Orphan <sup>f</sup> |
|---------------------------|--------|----------------------|------------------------|------------------------|-----------------------------|-------------|------------------------------|------------------------------------------|-------------------------------|------------------------------------------|---------------------|
| 5170524                   | +      | 0.0000               | 14                     | 0                      | XCV4482                     | 28          | -                            | -                                        | -                             | -                                        | -                   |
| 5178255                   | -      | 0.0000               | 293                    | 20                     | XCV4486<br>XCV4487          | 210<br>31   | -                            | -                                        | -                             | -                                        | -                   |
| 5178392                   | +      | 0.0000               | 23                     | 2                      | -                           | -           | -                            | -                                        | -                             | -                                        | +                   |

## Reference

1. Thieme, F., Koebnik, R., Bekel, T., Berger, C., Boch, J., Büttner, D., Caldana, C., Gaigalat, L., Goesmann, A., Kay, S. *et al.* (2005) Insights into genome plasticity and pathogenicity of the plant pathogenic bacterium *Xanthomonas campestris* pv. *vesicatoria* revealed by the complete genome sequence. *J. Bacteriol.*, **187**, 7254-7266.

<sup>a</sup>, TSS position on the *Xcv* chromosome and the plasmid (pXCV183; marked with #), respectively. <sup>b</sup>, p-value indicates the significance of the annotated TSS (see METHODS). <sup>c</sup>, number of read starts at TSS position. <sup>d</sup>, TSS classification and the corresponding CDS. <sup>e</sup>, distance of the TSS to annotated start and stop codon of the corresponding CDS. <sup>f</sup>, a TSS is classified as orphan (+) if it is neither classified as primary, internal nor antisense TSS.

**Table S3.** Putative chromosomal TSSs within the first 50 bp of annotated CDSs (1).

| CDS     | Strand | Annotated translation start | TSS position | Library 2 <sup>a</sup> | Library 1 <sup>a</sup> | Distance of annotated start codon and TSS (bp) |
|---------|--------|-----------------------------|--------------|------------------------|------------------------|------------------------------------------------|
| XCV0016 | +      | 17004                       | 17027        | 42                     | 18                     | 24                                             |
| XCV0022 | +      | 23353                       | 23398        | 13                     | 1                      | 46                                             |
| XCV0035 | -      | 38772                       | 38760        | 13                     | 0                      | 13                                             |
| XCV0117 | +      | 133981                      | 133989       | 3                      | 1                      | 9                                              |
| XCV0209 | +      | 244583                      | 244587       | 15                     | 2                      | 5                                              |
| XCV0322 | +      | 369633                      | 369663       | 3                      | 0                      | 31                                             |
| XCV0327 | -      | 375518                      | 375494       | 3                      | 0                      | 25                                             |
| XCV0383 | +      | 436658                      | 436669       | 4                      | 0                      | 12                                             |
| XCV0387 | -      | 441649                      | 441623       | 4                      | 0                      | 27                                             |
| XCV0493 | +      | 557939                      | 557964       | 3                      | 0                      | 26                                             |
| XCV0522 | -      | 589469                      | 589427       | 10                     | 0                      | 43                                             |
| XCV0537 | +      | 602285                      | 602321       | 16                     | 1                      | 37                                             |
| XCV0579 | +      | 656595                      | 656637       | 6                      | 2                      | 43                                             |
| XCV0632 | -      | 713619                      | 713610       | 3                      | 0                      | 10                                             |
| XCV0648 | +      | 732783                      | 732826       | 4                      | 0                      | 44                                             |
| XCV0653 | -      | 736984                      | 736976       | 3                      | 0                      | 9                                              |
| XCV0781 | +      | 893350                      | 893392       | 6                      | 0                      | 43                                             |
| XCV0816 | -      | 931162                      | 931121       | 3                      | 0                      | 42                                             |
| XCV0821 | -      | 936169                      | 936154       | 12                     | 1                      | 16                                             |
| XCV1073 | -      | 1206623                     | 1206581      | 3                      | 0                      | 43                                             |
| XCV1074 | +      | 1206680                     | 1206687      | 11                     | 1                      | 8                                              |
| XCV1141 | +      | 1270899                     | 1270936      | 47                     | 4                      | 38                                             |
| XCV1155 | -      | 1284633                     | 1284606      | 4                      | 1                      | 28                                             |
| XCV1239 | -      | 1391023                     | 1390988      | 3                      | 0                      | 36                                             |
| XCV1332 | -      | 1498481                     | 1498473      | 8                      | 0                      | 9                                              |
| XCV1400 | -      | 1581081                     | 1581048      | 5                      | 1                      | 34                                             |
| XCV1465 | -      | 1648439                     | 1648431      | 5                      | 0                      | 9                                              |
| XCV1499 | +      | 1690119                     | 1690128      | 3                      | 0                      | 10                                             |
| XCV1586 | -      | 1793475                     | 1793470      | 7                      | 0                      | 6                                              |
| XCV1611 | -      | 1825244                     | 1825238      | 8                      | 1                      | 7                                              |
| XCV1617 | -      | 1830765                     | 1830728      | 3                      | 0                      | 38                                             |
| XCV1654 | +      | 1864564                     | 1864572      | 7                      | 0                      | 9                                              |
| XCV1922 | +      | 2173724                     | 2173764      | 3                      | 1                      | 41                                             |
| XCV2017 | -      | 2299645                     | 2299637      | 29                     | 3                      | 9                                              |
| XCV2073 | +      | 2363433                     | 2363454      | 8                      | 0                      | 22                                             |
| XCV2207 | +      | 2536959                     | 2536986      | 11                     | 2                      | 28                                             |
| XCV2320 | +      | 2651486                     | 2651497      | 151                    | 12                     | 12                                             |
| XCV2329 | -      | 2660238                     | 2660227      | 151                    | 14                     | 12                                             |
| XCV2340 | -      | 2672433                     | 2672422      | 151                    | 14                     | 12                                             |
| XCV2341 | -      | 2673253                     | 2672422      | 151                    | 14                     | 12                                             |
| XCV2353 | +      | 2682750                     | 2682761      | 151                    | 12                     | 12                                             |
| XCV2482 | +      | 2801007                     | 2801025      | 5                      | 0                      | 19                                             |
| XCV2535 | +      | 2859384                     | 2859395      | 5                      | 1                      | 12                                             |
| XCV2729 | -      | 3103384                     | 3103362      | 3                      | 0                      | 23                                             |
| XCV2750 | +      | 3130305                     | 3130321      | 5                      | 0                      | 17                                             |
| XCV2770 | -      | 3151135                     | 3151089      | 4                      | 0                      | 47                                             |
| XCV2971 | -      | 3379738                     | 3379701      | 7                      | 1                      | 38                                             |
| XCV2972 | -      | 3380697                     | 3380658      | 4                      | 0                      | 40                                             |
| XCV2974 | -      | 3385412                     | 3385409      | 12                     | 1                      | 4                                              |
| XCV3037 | -      | 3459123                     | 3459115      | 10                     | 5                      | 9                                              |
| XCV3065 | +      | 3488846                     | 3488858      | 8                      | 0                      | 13                                             |
| XCV3123 | +      | 3539930                     | 3539954      | 11                     | 0                      | 25                                             |
| XCV3188 | -      | 3624084                     | 3624042      | 14                     | 2                      | 43                                             |
| XCV3257 | +      | 3725390                     | 3725397      | 7                      | 0                      | 8                                              |
| XCV3392 | -      | 3880185                     | 3880139      | 52                     | 3                      | 47                                             |
| XCV3491 | -      | 3999770                     | 3999749      | 3                      | 0                      | 22                                             |
| XCV3532 | +      | 4042171                     | 4042199      | 3                      | 0                      | 29                                             |
| XCV3625 | -      | 4171917                     | 4171902      | 5                      | 1                      | 16                                             |

<sup>a</sup>, number of read starts at TSS position.

| CDS     | Strand | Annotated translation start | TSS position | Library 2 <sup>a</sup> | Library 1 <sup>a</sup> | Distance of annotated start codon and TSS (bp) |
|---------|--------|-----------------------------|--------------|------------------------|------------------------|------------------------------------------------|
| XCV3746 | +      | 4328075                     | 4328091      | 13                     | 3                      | 17                                             |
| XCV3949 | -      | 4533871                     | 4533862      | 86                     | 11                     | 10                                             |
| XCV4048 | +      | 4649393                     | 4649419      | 3                      | 0                      | 27                                             |
| XCV4053 | -      | 4654582                     | 4654564      | 9                      | 6                      | 19                                             |
| XCV4111 | +      | 4706344                     | 4706354      | 4                      | 1                      | 11                                             |
| XCV4134 | -      | 4731623                     | 4731606      | 3                      | 0                      | 18                                             |
| XCV4151 | -      | 4751417                     | 4751394      | 4                      | 0                      | 24                                             |
| XCV4167 | -      | 4776008                     | 4775972      | 3                      | 0                      | 37                                             |
| XCV4315 | -      | 4966236                     | 4966194      | 8                      | 2                      | 43                                             |
| XCV4323 | +      | 4971298                     | 4971307      | 6                      | 1                      | 10                                             |
| XCV4369 | +      | 5024928                     | 5024943      | 9                      | 0                      | 16                                             |
| XCV4387 | -      | 5051851                     | 5051823      | 15                     | 0                      | 29                                             |
| XCV4470 | -      | 5156569                     | 5156544      | 8                      | 0                      | 26                                             |

### Reference

1. Thieme, F., Koebnik, R., Bekel, T., Berger, C., Boch, J., Büttner, D., Caldana, C., Gaigalat, L., Goesmann, A., Kay, S. *et al.* (2005) Insights into genome plasticity and pathogenicity of the plant pathogenic bacterium *Xanthomonas campestris* pv. *vesicatoria* revealed by the complete genome sequence. *J. Bacteriol.*, **187**, 7254-7266.

<sup>a</sup>, number of read starts at TSS position.



**Table S4.** Predicted antisense TSSs located close to the 3' end of annotated CDSs (+/- 100 bp) (1).

| TSS position <sup>a</sup> | Strand | Library 2 <sup>b</sup> | Library 1 <sup>b</sup> | Distance of CDS end to TSS <sup>c</sup> (bp) | Gene product                                                          |
|---------------------------|--------|------------------------|------------------------|----------------------------------------------|-----------------------------------------------------------------------|
| 81749#                    | -      | 9                      | 2                      | 43                                           | XCVd0073: hypothetical protein                                        |
| 109851#                   | +      | 35                     | 6                      | -99                                          | XCVd0099: putative zeta toxin of the postsegregational killing system |
| 127227#                   | -      | 4                      | 2                      | -62                                          | XCVd0115: Tn5044 transposase                                          |
| 159633#                   | +      | 3                      | 0                      | -74                                          | XCVd0154: hypothetical protein                                        |
| 180140#                   | +      | 3                      | 0                      | -86                                          | XCVd0171: hypothetical protein                                        |
| 11675                     | -      | 6                      | 0                      | -72                                          | XCV0008: energy transducer TonB protein                               |
| 78522                     | +      | 23                     | 2                      | -46                                          | XCV0067: hypothetical protein                                         |
| 204493                    | +      | 12                     | 2                      | -71                                          | XCV0172: indolepyruvate ferredoxin oxidoreductase                     |
| 261741                    | -      | 15                     | 1                      | 3                                            | XCV0221: hypothetical protein                                         |
| 321787                    | -      | 7                      | 0                      | -77                                          | XCV0275: putative DNA-binding protein                                 |
| 485143                    | -      | 13                     | 0                      | -94                                          | XCV0435: HrcC protein                                                 |
| 533893                    | +      | 6                      | 0                      | -36                                          | XCV0472: hypothetical protein                                         |
| 558968                    | -      | 8                      | 1                      | -82                                          | XCV0493: hypothetical protein                                         |
| 590048                    | -      | 10                     | 0                      | -13                                          | XCV0523: 50S ribosomal protein L13                                    |
| 707695                    | +      | 4                      | 1                      | -8                                           | XCV0625: IS1477 transposase                                           |
| 799920                    | -      | 6                      | 2                      | -49                                          | XCV0704: hypothetical protein                                         |
| 1041488                   | -      | 3                      | 1                      | 21                                           | XCV0911: putative secreted protein                                    |
| 1095646                   | -      | 4                      | 0                      | -86                                          | XCV0964: hypothetical protein                                         |
| 1454260                   | -      | 3                      | 1                      | -15                                          | XCV1295: putative phage replication protein                           |
| 1618915                   | +      | 4                      | 0                      | -35                                          | XCV1441: methionyl-tRNA synthetase                                    |
| 1659403                   | +      | 4                      | 0                      | 93                                           | XCV1477: putative signal transduction protein                         |
| 1750856                   | +      | 21                     | 2                      | -46                                          | XCV1552: hypothetical protein                                         |
| 1783909                   | +      | 5                      | 0                      | -52                                          | XCV1579: hypothetical protein                                         |
| 1875752                   | -      | 6                      | 0                      | -78                                          | XCV1666: hypothetical protein                                         |
| 1880820                   | -      | 3                      | 0                      | -42                                          | XCV1669: lysyl-tRNA synthetase                                        |
| 2078061                   | +      | 4                      | 1                      | -8                                           | XCV1840: IS1477 transposase                                           |
| 2081955                   | +      | 3                      | 0                      | -76                                          | XCV1846: ISxcC1 transposase                                           |
| 2191418                   | +      | 4                      | 0                      | 54                                           | XCV1936: hypothetical protein                                         |
| 2192469                   | +      | 3                      | 0                      | 20                                           | XCV1937: hypothetical protein                                         |
| 2484379                   | -      | 210                    | 29                     | -75                                          | XCV2161: conjugal transfer protein TrbL                               |
| 2580164                   | +      | 3                      | 0                      | -29                                          | XCV2250: putative secreted protein                                    |
| 2595113                   | -      | 5                      | 1                      | -68                                          | XCV2261: phage-related integrase                                      |
| 2656549                   | +      | 8                      | 4                      | -35                                          | XCV2325: streptomycin 6-kinase                                        |
| 2768989                   | -      | 10                     | 3                      | -67                                          | XCV2436: IS1595 transposase                                           |
| 2799097                   | +      | 5                      | 1                      | -68                                          | XCV2479: putative replication protein C (fragment)                    |
| 2813614                   | +      | 3                      | 0                      | -90                                          | XCV2492: glycosyltransferase                                          |
| 2885613                   | -      | 6                      | 1                      | 43                                           | XCV2557: hypothetical protein                                         |
| 3151886                   | +      | 4                      | 1                      | -8                                           | XCV2772: IS1477 transposase                                           |
| 3206053                   | +      | 4                      | 1                      | -8                                           | XCV2816: IS1477 transposase                                           |
| 3845146                   | -      | 3                      | 1                      | 84                                           | XCV3357: putative secreted protein                                    |
| 3873924                   | +      | 20                     | 2                      | -46                                          | XCV3388: hypothetical protein                                         |
| 3899941                   | -      | 5                      | 0                      | -64                                          | XCV3412: ISxac2 transposase                                           |
| 4027759                   | -      | 3                      | 0                      | -55                                          | XCV3514: ribonuclease PH                                              |
| 4367233                   | -      | 11                     | 0                      | -77                                          | XCV3782: OmpW family outer membrane protein                           |
| 4367880                   | -      | 8                      | 1                      | 47                                           | XCV3783: putative secreted protein                                    |
| 4492830                   | +      | 3                      | 0                      | -56                                          | XCV3913: D-tyrosyl-tRNA(Tyr) deacylase                                |
| 4808258                   | -      | 5                      | 1                      | -36                                          | XCV4197: hypothetical protein                                         |
| 4968288                   | -      | 3                      | 0                      | 84                                           | XCV4318: hypothetical protein                                         |
| 5105859                   | +      | 10                     | 1                      | 94                                           | XCV4430: hypothetical protein                                         |

<sup>a</sup>, TSS position on the *Xcv* chromosome and the plasmid (pXCV183; marked with #), respectively. <sup>b</sup>, number of read starts at TSS position.

<sup>c</sup>, positive and negative sign indicates TSS within and downstream the CDS, respectively.

## Reference

1. Thieme, F., Koebnik, R., Bekel, T., Berger, C., Boch, J., Büttner, D., Caldana, C., Gaigalat, L., Goesmann, A., Kay, S. *et al.* (2005) Insights into genome plasticity and pathogenicity of the plant pathogenic bacterium *Xanthomonas campestris* pv. *vesicatoria* revealed by the complete genome sequence. *J. Bacteriol.*, **187**, 7254-7266.

**Table S5.** 5' UTRs of type III effector genes, leaderless genes with TSSs  $\leq 10$  bp upstream of the annotated start codon and genes containing long 5' UTRs (150 to 300 bp) referring to the annotated genome sequence of *Xcv* strain 85-10 (1). TSSs marked with # are located on pXCV183. TSSs of type III effector genes marked in bold exhibit a PIP box and -10 T/A-rich element as previously described (2). The PIP box of the type III effector gene *XCV2280* was identified in this study and is shown in brackets.

| TSS position                         | Strand | Library 2 <sup>a</sup> | Library 1 <sup>a</sup> | 5' UTR (bp) | Gene product                                                                  |
|--------------------------------------|--------|------------------------|------------------------|-------------|-------------------------------------------------------------------------------|
| <b>5' UTRs of Type III Effectors</b> |        |                        |                        |             |                                                                               |
| 114827#                              | -      | 11                     | 0                      | 375         | XCVd0104: avirulence protein AvrBs1                                           |
| <b>62304</b>                         | +      | 3                      | 0                      | 23          | XCV0052: avirulence protein AvrBs2                                            |
| <b>486511</b>                        | +      | 5                      | 0                      | 678         | XCV0437: xanthomonas outer protein D (XopD)                                   |
| <b>532770</b>                        | +      | 8                      | 1                      | 0           | XCV0471: avirulence protein AvrRxv                                            |
| <b>660302</b>                        | +      | 12                     | 2                      | 341         | XCV0581: xanthomonas outer protein B (XopB)                                   |
| <b>1184957</b>                       | +      | 12                     | 1                      | 25          | XCV1055: xanthomonas outer protein O (XopO)                                   |
| <b>2480236</b>                       | -      | 183                    | 10                     | 22          | XCV2156: xanthomonas outer protein J1 (XopJ1)                                 |
| 2613410<br>(2613343-2613403)         | +      | 33                     | 2                      | 23          | XCV2280: xanthomonas outer protein E2 (XopE2)                                 |
| <b>2767760</b>                       | -      | 8                      | 1                      | 187         | XCV2435: xanthomonas outer protein C (XopC)                                   |
| 3348398                              | +      | 12                     | 3                      | 173         | XCV2944: xanthomonas outer protein N (XopN)                                   |
| <b>4371772</b>                       | -      | 68                     | 5                      | 477         | XCV3785: xanthomonas outer protein AA (XopAA)                                 |
| <b>Leaderless Transcripts</b>        |        |                        |                        |             |                                                                               |
| 193010                               | +      | 9                      | 2                      | 0           | XCV0161: putative amidase/aminoacylase/peptidase family protein               |
| 201827                               | -      | 7                      | 2                      | 0           | XCV0168: putative secreted protein                                            |
| 238550                               | -      | 7                      | 0                      | 0           | XCV0201: uroporphyrinogen-III synthase                                        |
| 278015                               | -      | 6                      | 0                      | 0           | XCV0236: predicted rRNA methylase                                             |
| 283462                               | +      | 4                      | 0                      | 0           | XCV0243: acyl-CoA synthetase                                                  |
| 288111                               | +      | 10                     | 5                      | 0           | XCV0247: hypothetical protein                                                 |
| 332993                               | +      | 9                      | 1                      | 0           | XCV0287: predicted hydrolase of the alpha/beta superfamily                    |
| 377721                               | +      | 4                      | 0                      | 3           | XCV0330: putative NADH flavin oxidoreductase                                  |
| 411941                               | +      | 3                      | 1                      | 6           | XCV0359: predicted Fe-S-cluster oxidoreductase                                |
| <b>532770</b>                        | +      | 8                      | 1                      | 0           | XCV0471: avirulence protein AvrRxv                                            |
| 585332                               | +      | 8                      | 5                      | 0           | XCV0518: phosphoserine phosphatase                                            |
| 599405                               | +      | 18                     | 5                      | 0           | XCV0534: putative Iron-sulfur cluster assembly accessory protein              |
| 770365                               | +      | 4                      | 0                      | 0           | XCV0679: porphobilinogen deaminase                                            |
| 779535                               | -      | 8                      | 3                      | 0           | XCV0686: aspartate/tyrosine/aromatic aminotransferase                         |
| 782120                               | +      | 7                      | 0                      | 0           | XCV0688: hypothetical protein                                                 |
| 823961                               | +      | 4                      | 0                      | 0           | XCV0723: membrane-bound lytic transglycosylase                                |
| 851592                               | +      | 8                      | 0                      | 0           | XCV0747: 2-amino-4-hydroxy-6-hydroxymethylidihydropteridine pyrophosphokinase |
| 884284                               | -      | 4                      | 0                      | 0           | XCV0773: tRNA nucleotidyltransferase/poly(A) polymerase                       |
| 959187                               | +      | 9                      | 2                      | 0           | XCV0840: thiamine monophosphate synthase                                      |
| 997844                               | -      | 21                     | 0                      | 0           | XCV0868: tRNA-dihydrouridine synthase                                         |
| 1028253                              | -      | 3                      | 0                      | 0           | XCV0899: hypothetical protein                                                 |
| 1029078                              | -      | 5                      | 0                      | 0           | XCV0900: dimethyladenosine transferase (rRNA methylation)                     |
| 1036560                              | +      | 6                      | 0                      | 0           | XCV0907: 2-octaprenyl-6-methoxyphenyl hydroxylase                             |
| 1102907                              | -      | 3                      | 1                      | 0           | XCV0973: molybdenum cofactor biosynthesis protein B                           |
| 1265655                              | -      | 3                      | 1                      | 0           | XCV1134: MoxR-like ATPase                                                     |
| 1419087                              | +      | 8                      | 1                      | 0           | XCV1260: two-component system sensor protein                                  |
| 1450021                              | +      | 8                      | 1                      | 0           | XCV1292: 4-hydroxy-3-methylbut-2-enyl diphosphate reductase                   |
| 1504286                              | -      | 15                     | 0                      | 0           | XCV1337: putative cytochrome C assembly protein                               |
| 1601206                              | +      | 5                      | 2                      | 0           | XCV1423: hypothetical protein                                                 |
| 1631636                              | -      | 3                      | 0                      | 8           | XCV1452: hypothetical protein                                                 |
| 1631992                              | +      | 3                      | 1                      | 10          | XCV1453: hypothetical protein                                                 |
| 1669473                              | +      | 12                     | 1                      | 0           | XCV1485: methionine aminopeptidase                                            |
| 1712207                              | -      | 4                      | 0                      | 0           | XCV1516: ABC transporter permease and ATP-binding protein                     |
| 1719682                              | +      | 20                     | 2                      | 0           | XCV1525: NAD/FAD-binding protein                                              |
| 1756686                              | -      | 27                     | 2                      | 0           | XCV1556: tmRNA-binding protein SmpB                                           |
| 1816736                              | +      | 17                     | 0                      | 1           | XCV1607: RNase R                                                              |

<sup>a</sup>, number of read starts at the TSS position.

| TSS position | Strand | Library 2 <sup>a</sup> | Library 1 <sup>a</sup> | 5' UTR (bp) | Gene product                                                      |
|--------------|--------|------------------------|------------------------|-------------|-------------------------------------------------------------------|
| 1843191      | +      | 5                      | 0                      | 0           | XCV1631: hypothetical protein                                     |
| 1859472      | -      | 7                      | 2                      | 0           | XCV1646: carbonic anhydrase                                       |
| 1988882      | +      | 9                      | 2                      | 9           | XCV1768: RNA-binding protein Hfq                                  |
| 1993650      | +      | 4                      | 1                      | 0           | XCV1772: LexA repressor                                           |
| 2046910      | +      | 3                      | 0                      | 10          | XCV1814: tRNA nucleotidyltransferase/poly(A) polymerase           |
| 2056210      | +      | 3                      | 0                      | 3           | XCV1823: Glucan 1,4-beta-glucosidase precursor                    |
| 2066165      | -      | 6                      | 3                      | 0           | XCV1828: two-component system sensor protein                      |
| 2066489      | +      | 7                      | 0                      | 0           | XCV1829: 4-hydroxy-3-methylbut-2-en-1-yl diphosphate synthase     |
| 2133276      | -      | 11                     | 2                      | 0           | XCV1886: methylthioribulose-1-phosphate dehydratase               |
| 2316851      | -      | 7                      | 0                      | 0           | XCV2034: chemotaxis signal transduction protein                   |
| 2349615      | +      | 5                      | 0                      | 0           | XCV2060: putative ATPase                                          |
| 2363433      | +      | 8                      | 0                      | 0           | XCV2073: molybdopterin biosynthesis protein                       |
| 2411526      | -      | 3                      | 0                      | 0           | XCV2105: two-component system sensor kinase                       |
| 2534689      | +      | 11                     | 4                      | 0           | XCV2204: hypothetical protein                                     |
| 2646914      | +      | 3                      | 0                      | 1           | XCV2314: ArsR family transcriptional regulator                    |
| 2744537      | -      | 3                      | 0                      | 9           | XCV2419: FKBP-type peptidyl-prolyl cis-trans isomerase            |
| 2744576      | +      | 7                      | 4                      | 0           | XCV2420: putative membrane protein                                |
| 2745041      | +      | 4                      | 0                      | 0           | XCV2421: predicted sulfurtransferase                              |
| 2756332      | +      | 14                     | 3                      | 0           | XCV2429: thioredoxin-like protein                                 |
| 2843374      | +      | 8                      | 0                      | 0           | XCV2519: glutamine cyclotransferase                               |
| 2853818      | +      | 8                      | 1                      | 0           | XCV2531: homoserine O-acetyltransferase                           |
| 2915414      | -      | 21                     | 2                      | 0           | XCV2586: ABC transporter ATPase                                   |
| 2915525      | +      | 5                      | 1                      | 0           | XCV2587: ATP-dependent RNA helicase                               |
| 2927298      | +      | 3                      | 0                      | 4           | XCV2597: glutamyl-tRNA synthetase                                 |
| 2935603      | -      | 17                     | 4                      | 0           | XCV2603: N-acetylmuramoyl-L-alanine amidase precursor             |
| 2937657      | -      | 4                      | 1                      | 0           | XCV2605: hypothetical protein                                     |
| 2966234      | -      | 8                      | 1                      | 0           | XCV2630: stringent starvation protein B                           |
| 2971502      | -      | 31                     | 4                      | 0           | XCV2635: putative soluble lytic murein transglycosylase precursor |
| 3024425      | +      | 3                      | 0                      | 0           | XCV2675: TetR family transcriptional regulator                    |
| 3065332      | -      | 14                     | 0                      | 0           | XCV2704: cellulase precursor                                      |
| 3129258      | -      | 71                     | 9                      | 0           | XCV2748: proline racemase                                         |
| 3142239      | +      | 3                      | 0                      | 4           | XCV2763: HNH endonuclease family protein                          |
| 3304605      | -      | 3                      | 0                      | 0           | XCV2902: putative 6-O-methylguanine-DNA methyltransferase         |
| 3317782      | +      | 48                     | 8                      | 0           | XCV2915: exodeoxyribonuclease VII small subunit                   |
| 3325124      | -      | 8                      | 3                      | 0           | XCV2923: putative modulator of DNA gyrase                         |
| 3334516      | -      | 17                     | 1                      | 0           | XCV2931: rRNA large subunit methyltransferase                     |
| 3339362      | -      | 14                     | 0                      | 0           | XCV2936: rare lipoprotein B                                       |
| 3377499      | +      | 8                      | 0                      | 0           | XCV2970: hypothetical protein                                     |
| 3390399      | +      | 3                      | 0                      | 0           | XCV2983: 3-methyladenine DNA glycosylase                          |
| 3410761      | +      | 15                     | 3                      | 6           | XCV3000: LysR family transcriptional regulator                    |
| 3429740      | +      | 4                      | 0                      | 0           | XCV3016: hypothetical protein                                     |
| 3450047      | +      | 4                      | 1                      | 0           | XCV3030: deoxyribonuclease V                                      |
| 3487971      | -      | 7                      | 0                      | 0           | XCV3063: hypothetical protein                                     |
| 3505699      | +      | 18                     | 4                      | 0           | XCV3083: acetyltransferase (GNAT) family protein                  |
| 3518387      | -      | 994                    | 98                     | 0           | XCV3096: ComEA-related DNA uptake protein                         |
| 3533944      | +      | 4                      | 1                      | 2           | XCV3116: putative secreted protein                                |
| 3539930      | +      | 24                     | 15                     | 0           | XCV3123: putative enzyme II of the phosphotransferase system      |
| 3583485      | +      | 5                      | 1                      | 0           | XCV3162: hypothetical protein                                     |
| 3601849      | +      | 8                      | 3                      | 0           | XCV3169: hypothetical protein                                     |
| 3639271      | +      | 16                     | 2                      | 0           | XCV3202: adenosylmethionine--8-amino-7-oxononoate transaminase    |
| 3744037      | -      | 6                      | 1                      | 0           | XCV3277: Holliday junction DNA helicase                           |
| 3862413      | +      | 7                      | 3                      | 0           | XCV3376: hypothetical protein                                     |
| 3903440      | +      | 13                     | 1                      | 0           | XCV3416: thiamin S sulphur transfer protein                       |
| 3963400      | +      | 26                     | 4                      | 0           | XCV3461: hypothetical protein                                     |
| 3991134      | +      | 3                      | 0                      | 0           | XCV3486: putative secreted protein                                |
| 4007577      | -      | 28                     | 2                      | 0           | XCV3496: MoxR-like ATPase                                         |
| 4024561      | -      | 9                      | 1                      | 0           | XCV3510: guanosine-3',5'-bis(diphosphate) 3'-pyrophosphohydrolase |

<sup>a</sup>, number of read starts at the TSS position.

| TSS position | Strand | Library 2 <sup>a</sup> | Library 1 <sup>a</sup> | 5' UTR (bp) | Gene product                                                           |
|--------------|--------|------------------------|------------------------|-------------|------------------------------------------------------------------------|
| 4064199      | +      | 5                      | 1                      | 0           | XCV3548: putative membrane-associated phospholipid phosphatase         |
| 4069816      | -      | 7                      | 1                      | 0           | XCV3552: UDP-N-acetylmuramate--L-alanine ligase                        |
| 4122387      | +      | 8                      | 2                      | 0           | XCV3589: TetR family transcriptional regulator                         |
| 4199423      | -      | 6                      | 0                      | 2           | XCV3647: nicotinate phosphoribosyltransferase                          |
| 4264986      | -      | 16                     | 5                      | 0           | XCV3690: CDP-diacylglycerol--serine O-phosphatidyltransferase          |
| 4318420      | +      | 7                      | 1                      | 0           | XCV3737: putative signal transduction protein                          |
| 4411740      | -      | 7                      | 1                      | 0           | XCV3826: hypothetical protein                                          |
| 4526218      | +      | 4                      | 0                      | 0           | XCV3943: primosomal protein N                                          |
| 4537266      | -      | 8                      | 0                      | 0           | XCV3953: ABC transporter ATP-binding protein involved in cell division |
| 4550453      | -      | 7                      | 1                      | 0           | XCV3963: hypothetical protein                                          |
| 4564127      | -      | 4                      | 0                      | 0           | XCV3971: HAD superfamily hydrolase                                     |
| 4583277      | +      | 6                      | 2                      | 0           | XCV3994: DNA primase                                                   |
| 4590816      | -      | 9                      | 5                      | 0           | XCV3999: hypothetical protein                                          |
| 4626132      | +      | 3                      | 1                      | 1           | XCV4029: arginyl-tRNA synthetase                                       |
| 4674977      | +      | 13                     | 3                      | 0           | XCV4079: predicted hydrolase (HAD superfamily)                         |
| 4720514      | -      | 4                      | 0                      | 1           | XCV4123: ATP-dependent DNA helicase                                    |
| 4808628      | +      | 17                     | 1                      | 0           | XCV4198: coproporphyrinogen III oxidase                                |
| 4813172      | -      | 6                      | 3                      | 0           | XCV4200: DNA polymerase I                                              |
| 4895203      | -      | 14                     | 2                      | 0           | XCV4262: putative secreted protein                                     |
| 4898418      | -      | 8                      | 2                      | 0           | XCV4264: methyltransferase                                             |
| 4904300      | -      | 5                      | 1                      | 9           | XCV4270: exodeoxyribonuclease III                                      |
| 4946992      | -      | 9                      | 0                      | 0           | XCV4306: putative outer membrane protein                               |
| 5047832      | +      | 11                     | 4                      | 0           | XCV4384: thymidine kinase                                              |
| 5164171      | -      | 3                      | 1                      | 0           | XCV4476: hypothetical protein                                          |
| 5165820      | +      | 4                      | 1                      | 0           | XCV4478: putative membrane protein                                     |

#### long 5' UTRs

|         |   |    |    |     |                                                                 |
|---------|---|----|----|-----|-----------------------------------------------------------------|
| 101600# | + | 5  | 0  | 287 | XCVd0093: putative secreted protein                             |
| 116378# | + | 80 | 8  | 277 | XCVd0107: ISxac2 transposase (fragment)                         |
| 118654# | + | 8  | 1  | 201 | XCVd0110: hypothetical protein                                  |
| 123136# | + | 5  | 0  | 218 | XCVd0114: putative cointegrate resolution protein S             |
| 1404    | + | 15 | 1  | 202 | XCV0002: DNA polymerase III subunit beta chain                  |
| 78978   | - | 8  | 5  | 225 | XCV0067: hypothetical protein                                   |
| 81973   | - | 6  | 2  | 270 | XCV0069: putative secreted protein                              |
| 117077  | - | 4  | 0  | 274 | XCV0099: putative secreted protein                              |
| 155750  | + | 11 | 2  | 227 | XCV0131: hypothetical protein                                   |
| 253127  | - | 25 | 10 | 203 | XCV0214: putative transposase                                   |
| 304274  | + | 5  | 0  | 150 | XCV0264: malate synthase                                        |
| 320398  | + | 6  | 1  | 234 | XCV0274: TetR family transcriptional regulator                  |
| 448950  | + | 3  | 0  | 226 | XCV0395: hypothetical protein                                   |
| 532651  | - | 5  | 0  | 151 | XCV0470: ATP-dependent RNA helicase                             |
| 647837  | + | 18 | 0  | 192 | XCV0574: phospho-2-dehydro-3-deoxyheptonate aldolase            |
| 765474  | + | 3  | 0  | 282 | XCV0675: glucans biosynthesis glucosyltransferase H             |
| 765583  | + | 3  | 0  | 173 | XCV0675: glucans biosynthesis glucosyltransferase H             |
| 782575  | + | 13 | 2  | 244 | XCV0689: diaminopimelate epimerase                              |
| 829714  | + | 24 | 4  | 266 | XCV0728: lipoate-protein ligase B                               |
| 951830  | + | 10 | 2  | 181 | XCV0835: cell division protein FtsZ                             |
| 1042407 | + | 7  | 1  | 180 | XCV0913: protocatechuate 4,5-dioxygenase beta chain             |
| 1116481 | + | 7  | 2  | 259 | XCV0986: transcription antitermination factor                   |
| 1137159 | + | 79 | 14 | 180 | XCV1002: 50S ribosomal protein L2                               |
| 1137964 | + | 9  | 2  | 209 | XCV1003: 30S ribosomal protein S19                              |
| 1149059 | + | 4  | 1  | 233 | XCV1024: 50S ribosomal protein L17                              |
| 1149619 | + | 3  | 0  | 180 | XCV1025: hypothetical protein                                   |
| 1164003 | - | 5  | 0  | 163 | XCV1036: hypothetical protein                                   |
| 1190312 | + | 8  | 2  | 228 | XCV1061: Glutamine phosphoribosylpyrophosphate amidotransferase |
| 1250212 | + | 5  | 1  | 153 | XCV1120: hypothetical protein                                   |
| 1340207 | + | 6  | 1  | 233 | XCV1198: hypothetical protein                                   |
| 1399557 | - | 4  | 2  | 291 | XCV1243: glycine cleavage system P-protein                      |

<sup>a</sup>, number of read starts at the TSS position.

| TSS position   | Strand | Library 2 <sup>a</sup> | Library 1 <sup>a</sup> | 5' UTR (bp) | Gene product                                                                           |
|----------------|--------|------------------------|------------------------|-------------|----------------------------------------------------------------------------------------|
| 1424474        | -      | 4                      | 0                      | 171         | XCV1265: putative D-alanyl-D-alanine carboxypeptidase                                  |
| 1549864        | +      | 6                      | 1                      | 189         | XCV1370: RNA polymerase ECF-type sigma factor RpoE2                                    |
| 1555991        | +      | 7                      | 2                      | 180         | XCV1375: putative membrane protein                                                     |
| 1580759        | -      | 6                      | 1                      | 248         | XCV1399: putative secreted protein                                                     |
| 1591652        | -      | 5                      | 1                      | 154         | XCV1410: hypothetical protein                                                          |
| 1653692        | -      | 18                     | 6                      | 209         | XCV1470: outer membrane antigen                                                        |
| 1663194        | -      | 15                     | 4                      | 242         | XCV1479: 30S ribosomal protein S2                                                      |
| 1676072        | +      | 7                      | 0                      | 220         | XCV1490: asparagine synthetase B                                                       |
| 1797706        | -      | 9                      | 0                      | 280         | XCV1591: GntR family transcriptional regulator                                         |
| 1998924        | +      | 18                     | 1                      | 249         | XCV1776: carbon storage regulator                                                      |
| 2011844        | -      | 4                      | 0                      | 264         | XCV1789: hypothetical protein                                                          |
| 2081259        | +      | 5                      | 1                      | 156         | XCV1845: putative membrane protein                                                     |
| 2109973        | +      | 20                     | 2                      | 151         | XCV1864: hypothetical protein                                                          |
| 2111307        | +      | 17                     | 4                      | 226         | XCV1866: bifunctional aspartokinase/homoserine dehydrogenase I                         |
| 2136615        | -      | 4                      | 0                      | 270         | XCV1888: amino acid-polyamine-organocation superfamily protein                         |
| 2236742        | -      | 5                      | 0                      | 157         | XCV1962: Flagellar motor component MotA                                                |
| 2339660        | +      | 10                     | 1                      | 270         | XCV2056: cell division protein FtsK                                                    |
| 2350997        | +      | 5                      | 2                      | 171         | XCV2061: Putative membrane-associated chromosome condensation protein                  |
| 2399163        | +      | 17                     | 2                      | 185         | XCV2103: putative filamentous hemagglutinin-like protein                               |
| 2630585        | +      | 5                      | 1                      | 207         | XCV2297: ISxac2 transposase                                                            |
| 2631738        | +      | 5                      | 1                      | 211         | XCV2298: phage-related integrase                                                       |
| 2676073        | +      | 17                     | 4                      | 205         | XCV2345: putative cytosine-specific DNA methylase                                      |
| <b>2767760</b> | -      | 8                      | 1                      | 187         | XCV2435: xanthomonas outer protein C (XopC)                                            |
| 2803838        | -      | 24                     | 7                      | 162         | XCV2484: phage-related integrase                                                       |
| 2811009        | -      | 3                      | 1                      | 296         | XCV2489: glutathione-regulated potassium efflux protein B                              |
| 2833387        | -      | 5                      | 1                      | 242         | XCV2509: putative secreted protein                                                     |
| 2880224        | -      | 36                     | 5                      | 264         | XCV2551: N-acetylornithine carbamoyltransferase                                        |
| 2894891        | +      | 45                     | 4                      | 229         | XCV2568: putative secreted protein                                                     |
| 2894892        | +      | 30                     | 0                      | 228         | XCV2568: putative secreted protein                                                     |
| 2921819        | -      | 349                    | 6                      | 157         | XCV2592: major cold shock protein                                                      |
| 2953268        | +      | 16                     | 2                      | 279         | XCV2620: putative DNA-binding protein                                                  |
| 2959110        | +      | 3                      | 0                      | 290         | XCV2626: 3-methyladenine DNA glycosylase                                               |
| 3011678        | +      | 3                      | 0                      | 212         | XCV2671: two-component system sensor histidine kinase-response regulator hybridprotein |
| 3045902        | -      | 5                      | 1                      | 242         | XCV2688: hypothetical protein                                                          |
| 3094539        | -      | 8                      | 0                      | 242         | XCV2725: TonB-dependent outer membrane receptor                                        |
| 3106814        | -      | 16                     | 1                      | 214         | XCV2730: TonB-dependent outer membrane receptor                                        |
| 3174731        | -      | 7                      | 1                      | 263         | XCV2794: translation initiation factor IF-3                                            |
| 3196040        | -      | 12                     | 1                      | 257         | XCV2809: putative secreted protein                                                     |
| 3247561        | -      | 10                     | 1                      | 185         | XCV2854: preprotein translocase subunit SecG                                           |
| 3259835        | -      | 5                      | 1                      | 289         | XCV2865: tryptophan synthase subunit alpha                                             |
| 3348398        | +      | 12                     | 3                      | 173         | XCV2944: xanthomonas outer protein N (XopN)                                            |
| 3426246        | +      | 10                     | 2                      | 178         | XCV3013: putative cysteine protease precursor                                          |
| 3478034        | -      | 6                      | 0                      | 173         | XCV3053: UDP-N-acetylmuramoyl-L-alanyl-D-glutamate synthetase                          |
| 3496288        | +      | 13                     | 3                      | 199         | XCV3072: membrane-bound metalloendopeptidase                                           |
| 3531766        | -      | 12                     | 1                      | 281         | XCV3111: hypothetical protein                                                          |
| 3610521        | -      | 53                     | 4                      | 188         | XCV3177: homoserine O-acetyltransferase                                                |
| 3748830        | -      | 3                      | 0                      | 265         | XCV3281: Holliday junction resolvase                                                   |
| 3819837        | +      | 21                     | 0                      | 152         | XCV3337: glucose dehydrogenase                                                         |
| 3832104        | -      | 5                      | 0                      | 170         | XCV3345: NAD synthetase                                                                |
| 3872641        | -      | 20                     | 0                      | 179         | XCV3384: ISxac3 transposase                                                            |
| 3877920        | -      | 26                     | 2                      | 247         | XCV3391: hypothetical protein                                                          |
| 3886210        | +      | 17                     | 6                      | 173         | XCV3399: hypothetical protein                                                          |
| 3969443        | -      | 3                      | 0                      | 258         | XCV3465: phosphoglycerate kinase                                                       |
| 4012132        | -      | 6                      | 0                      | 174         | XCV3500: Tfp pilus assembly protein PilN                                               |
| 4037253        | +      | 14                     | 7                      | 218         | XCV3525: hypothetical protein                                                          |
| 4100738        | -      | 25                     | 1                      | 184         | XCV3575: thiamine biosynthesis protein ThiC                                            |

<sup>a</sup>, number of read starts at the TSS position.

| TSS position | Strand | Library 2 <sup>a</sup> | Library 1 <sup>a</sup> | 5' UTR (bp) | Gene product                                             |
|--------------|--------|------------------------|------------------------|-------------|----------------------------------------------------------|
| 4112499      | +      | 3                      | 0                      | 186         | XCV3583: 2-isopropylmalate synthase                      |
| 4258733      | +      | 4                      | 0                      | 283         | XCV3686: soluble lytic murein transglycosylase precursor |
| 4270597      | +      | 4                      | 0                      | 248         | XCV3696: ABC transporter ATP-binding protein             |
| 4282216      | -      | 7                      | 0                      | 260         | XCV3705: UDP-glucose dehydrogenase                       |
| 4309871      | -      | 9                      | 3                      | 186         | XCV3727: hypothetical protein                            |
| 4314757      | +      | 7                      | 2                      | 241         | XCV3733: ATP-dependent RNA helicase                      |
| 4326863      | -      | 3                      | 1                      | 182         | XCV3744: oligopeptidase A                                |
| 4413048      | -      | 4                      | 0                      | 252         | XCV3827: hypothetical protein                            |
| 4454565      | +      | 13                     | 1                      | 226         | XCV3871: hypothetical protein                            |
| 4480327      | -      | 6                      | 0                      | 262         | XCV3894: methionine aminopeptidase                       |
| 4485330      | -      | 11                     | 0                      | 218         | XCV3903: hypothetical protein                            |
| 4518620      | -      | 168                    | 23                     | 297         | XCV3936: tropinone reductase                             |
| 4627723      | +      | 9                      | 4                      | 299         | XCV4030: putative secreted protein                       |
| 4664567      | +      | 3                      | 0                      | 173         | XCV4067: hypothetical protein                            |
| 4735763      | -      | 7                      | 2                      | 177         | XCV4137: putative glutathione transferase                |
| 4748322      | -      | 5                      | 1                      | 160         | XCV4147: putative membrane protein                       |
| 4887536      | -      | 15                     | 2                      | 162         | XCV4257: 50S ribosomal protein L28                       |
| 5047838      | -      | 3                      | 0                      | 212         | XCV4383: ATP-dependent DNA helicase                      |
| 5116206      | -      | 11                     | 0                      | 222         | XCV4440: hypothetical protein                            |
| 5164230      | +      | 3                      | 0                      | 206         | XCV4477: tellurium resistance protein                    |

## References

1. Thieme, F., Koebnik, R., Bekel, T., Berger, C., Boch, J., Büttner, D., Caldana, C., Gaigalat, L., Goesmann, A., Kay, S. *et al.* (2005) Insights into genome plasticity and pathogenicity of the plant pathogenic bacterium *Xanthomonas campestris* pv. *vesicatoria* revealed by the complete genome sequence. *J. Bacteriol.*, **187**, 7254-7266.
2. Koebnik, R., Krüger, A., Thieme, F., Urban, A. and Bonas, U. (2006) Specific binding of the *Xanthomonas campestris* pv. *vesicatoria* AraC-type transcriptional activator HrpX to plant-inducible promoter boxes. *J. Bacteriol.*, **188**, 7652-7660.

<sup>a</sup>, number of read starts at the TSS position.

**Table S6.** Candidate riboswitches and widely conserved RNAs in *Xcv*.

| Riboswitch (Rfam entry) <sup>a</sup> | Chromosomal position (strand) <sup>b</sup> | TSS position <sup>c</sup> | Downstream CDS <sup>d</sup>                      |
|--------------------------------------|--------------------------------------------|---------------------------|--------------------------------------------------|
| FMN (RF00050)                        | 911608-911787 (+)                          | -                         | Riboflavin synthase subunit alpha (XCV0800)      |
| SAH (RF01057)                        | 976910-977023 (-)                          | 977026 (5/0)              | S-adenosyl-L-homocysteine hydrolase (XCV0856)    |
| Glycine (RF00504)                    | 1399365-1399480 (-)                        | 1399557 (4/2)             | Glycine dehydrogenase (XCV1243)                  |
|                                      | 1399482-1399550 (-)                        | -                         | Glycine dehydrogenase (XCV1243)                  |
| SAM (RF00162)                        | 3610402-3610523 (-)                        | 3610521 (53/4)            | Homoserine O-acetyltransferase (XCV3177)         |
| Cobalamin (RF00174)                  | 3801922-3802147 (-)                        | -                         | TonB-dependent outer membrane receptor (XCV3323) |
| TPP (RF00059)                        | 4100645-4100743 (-)                        | 4100738 (25/1)            | Thiamine biosynthesis protein ThiC (XCV3575)     |
| YybP-ykoY candidate (RF00080)        | 4924876-4924995 (+)                        | -                         | Hypothetical/putative membrane protein (XCV4291) |
| YybP-ykoY candidate (RF00080)        | 5164221-5164342 (+)                        | 5164230 (3/0)             | Tellurium resistance export protein (XCV4477)    |
| sRNA (Rfam entry) <sup>a</sup>       | Chromosomal position (strand) <sup>b</sup> | TSS position <sup>c</sup> | Chromosomal context <sup>e</sup>                 |
| RNaseP bacterial (RF00010)           | 933945-934295 (+)                          | 933943 (86/27)            | --> XCV0818 --> RNaseP --> XCV819                |
| RtT (RF00391)                        | 1235501-1235623 (+)                        | -                         | --> XCV1100 --> RtT --> XCV1101                  |
| SRP bacterial (RF00169)              | 1241912-1242175 (-)                        | 1242175 (91/11)           | --> XCV1109 <-- SRP <-- XCV1110                  |
| tmRNA (RF00023)                      | 1753051-1753447 (-)                        | 1753470 (31/1)            | <-- XCV1553 <-- tmRNA --> XCV1554                |
| 6S RNA (RF00013)                     | 4037865-4038049 (+)                        | 4037865 (2627/442)        | --> XCV3525 --> 6S RNA --> XCV3526               |

<sup>a</sup>, Putative riboswitches and widely conserved RNAs identified in *Rfam* database [see SI; (1)]. <sup>b</sup>, chromosomal position in *Xcv* corresponding to *Rfam* entry. <sup>c</sup>, TSS position in the *Xcv* chromosome (2). Numbers in brackets indicate read starts at TSS position (library 2/library 1). <sup>d</sup>, gene product of CDS annotated downstream of putative riboswitch (2). <sup>e</sup>, chromosomal orientation of sRNA gene and flanking CDSs indicated by arrows.

## References

- Gardner, P.P., Daub, J., Tate, J., Moore, B.L., Osuch, I.H., Griffiths-Jones, S., Finn, R.D., Nawrocki, E.P., Kolbe, D.L., Eddy, S.R. *et al.* (2010) Rfam: Wikipedia, clans and the "decimal" release. *Nucleic Acids Res.*, **39**, D141-145.
- Thieme, F., Koebnik, R., Bekel, T., Berger, C., Boch, J., Büttner, D., Caldana, C., Gaigalat, L., Goesmann, A., Kay, S. *et al.* (2005) Insights into genome plasticity and pathogenicity of the plant pathogenic bacterium *Xanthomonas campestris* pv. *vesicatoria* revealed by the complete genome sequence. *J. Bacteriol.*, **187**, 7254-7266.

**Table S7.** RNAcode prediction of novel chromosomal ORFs in *Xcv* (1, 2). Alternative start codons are listed under “chromosomal position”. RNAcode6 is highlighted in bold and corresponds to sX6 which was experimentally verified (see Figure 3).

| RNAcode prediction    | Chromosomal position (Strand) | Transcript Support <sup>a</sup> | TSS position <sup>b</sup> |
|-----------------------|-------------------------------|---------------------------------|---------------------------|
| RNAcode1              | 285154-285243 (+)             | 0/0                             | -                         |
| RNAcode2              | 465113-465232 (+)             | 0/0                             | -                         |
| RNAcode3              | 722692-722736 (+)             | 1/0                             | -                         |
| RNAcode4              | 1281664-1281846 (+)           | 1/1                             | -                         |
|                       | 1281757-1281846 (+)           |                                 |                           |
| RNAcode5              | 1435086-1435148 (+)           | 0/0                             | -                         |
|                       | 1435113-1435148 (+)           |                                 |                           |
| <b>RNAcode6 (sX6)</b> | <b>1971528-1971770 (+)</b>    | <b>15/1</b>                     | <b>1971505</b>            |
|                       | 1971591-1971770 (+)           |                                 |                           |
| RNAcode7              | 3457704-3457808 (+)           | 0/0                             | -                         |
|                       | 3457734-3457808 (+)           |                                 |                           |
| RNAcode8              | 3463701-3463796 (+)           | 3/4                             | -                         |
|                       | 3463743-3463796 (+)           |                                 |                           |
| RNAcode9              | 3727337-3727555 (+)           | 21/1                            | 3727405                   |
|                       | 3727361-3727555 (+)           |                                 |                           |
|                       | 3727445-3727555 (+)           |                                 |                           |
| RNAcode10             | 3848998-3849048 (+)           | 1/0                             | -                         |
| RNAcode11             | 4083126-4083464 (+)           | 0/0                             | -                         |
|                       | 4083348-4083464 (+)           |                                 |                           |
| RNAcode12             | 4368388-4368489 (+)           | 0/4                             | -                         |
| RNAcode13             | 4545859-4545918 (+)           | 0/0                             | -                         |
| RNAcode14             | 5098317-5098562 (+)           | 0/0                             | -                         |
|                       | 5098473-5098562 (+)           |                                 |                           |
| RNAcode15             | 644457-644513 (-)             | 0/0                             | -                         |
| RNAcode16             | 1219379-1219462 (-)           | 0/0                             | -                         |
|                       | 1219379-1219450 (-)           |                                 |                           |
| RNAcode17             | 1360037-1360129 (-)           | 0/0                             | -                         |
|                       | 1360037-1360120 (-)           |                                 |                           |
| RNAcode18             | 2429470-2429610 (-)           | 0/0                             | -                         |
|                       | 2429470-2429568 (-)           |                                 |                           |
| RNAcode19             | 2602554-2602655 (-)           | 0/0                             | -                         |
| RNAcode20             | 3215182-3215274 (-)           | 1/0                             | -                         |
|                       | 3215182-3215223 (-)           |                                 |                           |
| RNAcode21             | 3408680-3408883 (-)           | 4/0                             | 3408906                   |
| RNAcode22             | 3881142-3881246 (-)           | 2/0                             | -                         |
| RNAcode23             | 4104001-4104081 (-)           | 1/1                             | -                         |
|                       | 4104001-4104060 (-)           |                                 |                           |
| RNAcode24             | 5054413-5054448 (-)           | 1/0                             | -                         |

<sup>a</sup>, number of reads (library 2/library 1) mapped to the respective loci. <sup>b</sup>, automatically annotated TSS (see Table S2); “-“ no TSS identified.

## References

1. Thieme, F., Koebnik, R., Bekel, T., Berger, C., Boch, J., Büttner, D., Caldana, C., Gaigalat, L., Goesmann, A., Kay, S. *et al.* (2005) Insights into genome plasticity and pathogenicity of the plant pathogenic bacterium *Xanthomonas campestris* pv. vesicatoria revealed by the complete genome sequence. *J. Bacteriol.*, **187**, 7254-7266.
2. Washietl, S., Findeiß, S., Müller, S.A., Kalkhof, S., von Bergen, M., Hofacker, I.L., Stadler, P.F. and Goldman, N. (2011) RNAcode: Robust discrimination of coding and noncoding regions in comparative sequence data. *RNA*, **17**, 578-594.



**Table S8.** Genome sequences used for the calculation of multiple sequence alignments.

| NCBI ID     | Species name                                                                    |
|-------------|---------------------------------------------------------------------------------|
| NC_008752.1 | <i>Acidovorax avenae</i> subsp. <i>citrulli</i> AAC00-1, complete genome        |
| NC_004547.2 | <i>Erwinia carotovora</i> subsp. <i>atroseptica</i> SCRI1043, complete genome   |
| NC_010943.1 | <i>Stenotrophomonas maltophilia</i> K279a, complete genome                      |
| NC_011071.1 | <i>Stenotrophomonas maltophilia</i> R551-3, complete genome                     |
| NC_002516.2 | <i>Pseudomonas aeruginosa</i> PAO1, complete genome                             |
| NC_009656.1 | <i>Pseudomonas aeruginosa</i> PA7, complete genome                              |
| NC_008463.1 | <i>Pseudomonas aeruginosa</i> UCBPP-PA14, complete genome                       |
| NC_005773.3 | <i>Pseudomonas syringae</i> pv. <i>phaseolicola</i> 1448A, complete genome      |
| NC_007005.1 | <i>Pseudomonas syringae</i> pv. <i>syringae</i> B728a, complete genome          |
| NC_004578.1 | <i>Pseudomonas syringae</i> pv. <i>tomato</i> DC3000, complete genome           |
| NC_003295.1 | <i>Ralstonia solanacearum</i> GMI1000, complete genome                          |
| NC_003919.1 | <i>Xanthomonas axonopodis</i> pv. <i>citri</i> 306, complete genome             |
| NC_003902.1 | <i>Xanthomonas campestris</i> pv. <i>campestris</i> ATCC 33913, complete genome |
| NC_007086.1 | <i>Xanthomonas campestris</i> pv. <i>campestris</i> 8004, complete genome       |
| NC_007508.1 | <i>Xanthomonas campestris</i> pv. <i>vesicatoria</i> 85-10, complete genome     |
| NC_002488.3 | <i>Xylella fastidiosa</i> 9a5c, complete genome                                 |
| NC_004556.1 | <i>Xylella fastidiosa</i> Temecula1, complete genome                            |
| NC_006834.1 | <i>Xanthomonas oryzae</i> pv. <i>oryzae</i> KACC10331, complete genome          |
| NC_007705.1 | <i>Xanthomonas oryzae</i> pv. <i>oryzae</i> MAFF 311018, complete genome        |

**Table S9.** The extended two-by-two confusion matrix summarizes the predictive power of the automated TSS annotation approach. A subsample of the manually curated TSS map of *H. pylori* (1) was used as reference data set and evaluated with our method. The analyzed data-set contained 392 manually annotated TSSs. In total 566 genomic positions fulfilled the criteria (accumulation of at least three read starts) to be analyzed by our automated TSS annotation approach. According to Fawcett (2006), true positives (classified as TSS and also manually annotated) and false positives (classified as TSS but not manually annotated) as well as true negatives (neither classified as TSS nor manually annotated) and false negatives (not classified as TSS but manually annotated) were evaluated (2). Based on these values the calculated values for sensitivity, specificity as well as positive and negative predictive values are listed.

|                                      | Manually annotated TSSs<br>(392) |                      |                                   |
|--------------------------------------|----------------------------------|----------------------|-----------------------------------|
| Automatic<br>classification<br>(566) | True Positives: 321              | False Positives: 124 | Positive predictive<br>value: 72% |
|                                      | False Negatives: 71              | True Negatives: 50   | Negative predictive<br>value: 59% |
|                                      | Sensitivity: 82%                 | Specificity: 29%     |                                   |

## References

1. Sharma, C.M., Hoffmann, S., Darfeuille, F., Reignier, J., Findeiss, S., Sittka, A., Chabas, S., Reiche, K., Hackermüller, J., Reinhardt, R. *et al.* (2010) The primary transcriptome of the major human pathogen *Helicobacter pylori*. *Nature*, **464**, 250-255.
2. Fawcett, T. (2006) An introduction to ROC analysis. *Pattern recognition letters*, **27**, 861-874.
